# Supplementary material for: Novel Regioselective Synthesis of 1,3,4,5-Tetrasubstituted Pyrazoles and Biochemical Valuation on F1FO-ATPase and Mitochondrial Permeability Transition Pore Formation
Source: MDPI journal article supplement (doi:10.3390/pharmaceutics15020498), 2023-02-02
Supplement: s1 [file s1]

## ELECTRONIC SUPPORTING INFORMATION

# Novel regioselective synthesis of 1,3,4,5-tetrasubstituted pyrazoles and biochemical valuation on F<sub>1</sub>F<sub>0</sub>-ATPase and mitochondrial permeability transition pore formation

Vincenzo Algieri<sup>1,\*</sup>, Cristina Algieri<sup>2</sup>, Paola Costanzo<sup>1</sup>, Giulia Fiorani<sup>3</sup>, Antonio Jiritano<sup>1</sup>, Fabrizio Olivito<sup>1</sup>, Matteo Antonio Tallarida<sup>1</sup>, Fabiana Trombetti<sup>2</sup>, Loredana Maiuolo<sup>1</sup>, Antonio De Nino<sup>1,\*</sup> and Salvatore Nesci<sup>2</sup>

<sup>1</sup> Department of Chemistry and Chemical Technologies, University of Calabria, Via P. Bucci, Cubo 12C, 87036 Rende, CS, Italy

<sup>2</sup> Department of Veterinary Medical Sciences, Mitochondrial Biochemistry Lab, Via Tolara di Sopra, 50, 40064 Ozzano Emilia, BO, Italy

<sup>3</sup> Department Molecular Sciences and Nanosystems, University Ca' Foscari Venezia, Via Torino 155, 30172 Venezia Mestre, VE, Italy

\* Correspondence: Correspondence: vincenzo.algieri@unical.it (V.A.); denino@unical.it (A.D.N.)

|                                                                                   |      |
|-----------------------------------------------------------------------------------|------|
| General procedure for synthesis of benzoyl phenylhydrazines.....                  | S1   |
| General procedure for synthesis of hydrazonyl chlorides.....                      | S3   |
| General procedure for synthesis of [mPy]OTf.....                                  | S5   |
| Characterization spectra of benzoyl phenylhydrazines.....                         | S6   |
| Characterization spectra of hydrazonyl chlorides.....                             | S20  |
| Characterization spectra of 1,3,4,5-tetrasubstituted pyrazoles.....               | S34  |
| <sup>1</sup> H NMR spectra of crude reaction mixtures illustrated in Table 1..... | S93  |
| <sup>1</sup> H NMR spectra of crude reaction mixtures illustrated in Table 2..... | S104 |

## General procedure for synthesis of benzoyl phenylhydrazines

In according to the reaction described in **Scheme S1**, benzoyl phenylhydrazines were synthesized through a modified procedure reported in literature [1].

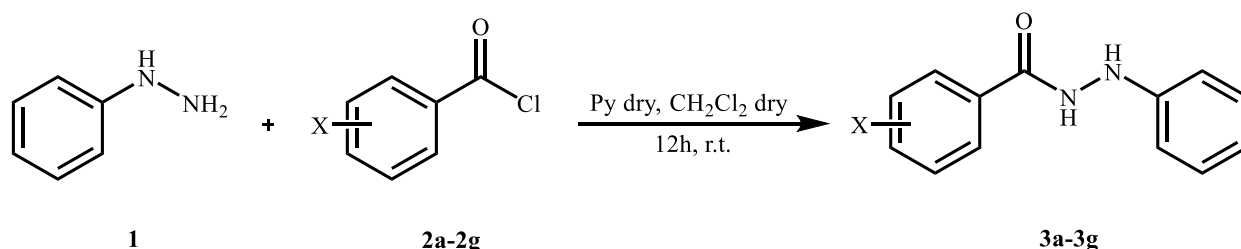

| Entry | X                  | Reagent   | Product   |
|-------|--------------------|-----------|-----------|
| 1     | H                  | <b>2a</b> | <b>3a</b> |
| 2     | 4-OCH <sub>3</sub> | <b>2b</b> | <b>3b</b> |
| 3     | 4-CH <sub>3</sub>  | <b>2c</b> | <b>3c</b> |
| 4     | 4-NO <sub>2</sub>  | <b>2d</b> | <b>3d</b> |
| 5     | 2-Cl               | <b>2e</b> | <b>3e</b> |
| 6     | 3-Cl               | <b>2f</b> | <b>3f</b> |
| 7     | 4-Cl               | <b>2g</b> | <b>3g</b> |

**Scheme S1.** Synthesis of variously substituted benzoyl phenylhydrazines **3a-3g**.

In a 500 ml three-necked round-bottomed flask, equipped with dropping funnel and magnetic stir bar, freshly distilled phenylhydrazine **1** (16.485 g, 0.1524 mol, 1 eq) was dissolved under nitrogen in dry CH<sub>2</sub>Cl<sub>2</sub> (100 ml) and fresh distilled dry pyridine (1.1 eq) was added dropwise at 0 °C for 30 min under vigorously stirring. Subsequently, temperature is kept at 0 °C and a solution of benzoyl chloride **2a-2g** (1.1 eq) in dry CH<sub>2</sub>Cl<sub>2</sub> (60 ml) was added dropwise for 3h. The reaction was gently warmed to room temperature and stirred for 16h. The mixture was extracted with CH<sub>2</sub>Cl<sub>2</sub> (3 x 100 ml) after addition of water (250 ml) and the combined organic layers were further washed with brine (3 x 30 ml), dried over anhydrous Na<sub>2</sub>SO<sub>4</sub> and the solvent was removed under reduced pressure. The crude solid was then purified by recrystallization with EtOH.

**N'-phenylbenzohydrazide (3a).** White solid. Yield 88%.

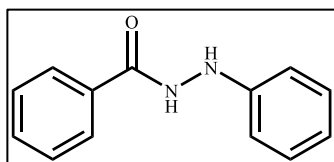

<sup>1</sup>H NMR (DMSO-d<sub>6</sub>, 300 MHz): δ (ppm) 6.67-6.76 (m, 1H, Ar), 6.76-6.88 (m, 2H, Ar), 7.10-7.22 (m, 2H, Ar), 7.43-7.64 (m, 3H, Ar), 7.84-8.06 (m, 3H, Ar and NH), 10.39 (s, 1H, NH).

<sup>13</sup>C NMR (DMSO-d<sub>6</sub>, 125 MHz): δ (ppm) 113.12, 119.56, 127.97, 129.22, 129.47, 132.41, 133.59, 150.06, 167.16.

**4-methoxy-*N'*-phenylbenzohydrazide (3b).** White solid. Yield 80%.

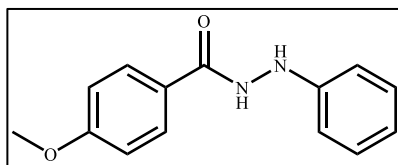

$^1\text{H}$  NMR (DMSO- $d_6$ , 300 MHz):  $\delta$  (ppm) 3.82 (s, 3H,  $\text{CH}_3$ ), 6.66-6.74 (m, 1H, Ar), 6.74-6.82 (m, 2H, Ar), 6.97-7.08 (m, 2H, Ar), 7.08-7.21 (m, 2H, Ar), 7.86 (d,  $J = 2.74\text{Hz}$ , 1H, NH), 7.88-7.97 (m, 2H, Ar), 10.24 (d,  $J = 2.74\text{Hz}$ , 1H, NH).

$^{13}\text{C}$  NMR (DMSO- $d_6$ , 125 MHz):  $\delta$  (ppm) 55.88, 112.82, 114.20, 119.06, 125.65, 129.21, 129.65, 150.20, 162.39, 166.34.

**4-methyl-*N'*-phenylbenzohydrazide (3c).** White solid. Yield 85%.

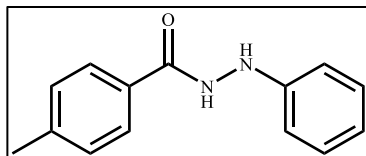

$^1\text{H}$  NMR (DMSO- $d_6$ , 300 MHz):  $\delta$  (ppm) 2.37 (s, 3H,  $\text{CH}_3$ ), 6.67-6.75 (m, 1H, Ar), 6.75-6.84 (m, 2H, Ar), 7.10-7.20 (m, 2H, Ar), 7.24-7.37 (m, 2H, Ar), 7.77-7.86 (m, 2H, Ar), 7.88 (d,  $J = 2.30\text{Hz}$ , 1H, NH), 10.30 (d,  $J = 2.30\text{Hz}$ , 1H, NH).

$^{13}\text{C}$  NMR (DMSO- $d_6$ , 125 MHz):  $\delta$  (ppm) 21.78, 113.17, 119.61, 128.09, 129.58, 129.86, 130.87, 142.58, 150.25, 167.35.

**4-nitro-*N'*-phenylbenzohydrazide (3d).** Orange solid. Yield 85%.

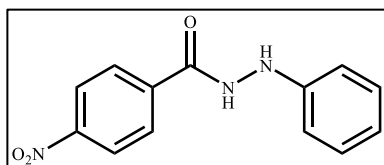

$^1\text{H}$  NMR (DMSO- $d_6$ , 300 MHz):  $\delta$  (ppm) 6.67-6.78 (m, 1H, Ar), 6.78-6.87 (m, 2H, Ar), 7.10-7.24 (m, 2H, Ar), 8.05 (bs, 1H, NH), 8.11-8.21 (m, 2H, Ar), 8.28-8.43 (m, 2H, Ar), 10.70 (s, 1H, NH).

$^{13}\text{C}$  NMR (DMSO- $d_6$ , 125 MHz):  $\delta$  (ppm) 112.88, 119.37, 124.16, 129.29, 129.35, 139.20, 149.57, 149.77, 165.30.

**2-chloro-*N'*-phenylbenzohydrazide (3e).** White solid. Yield 86%.

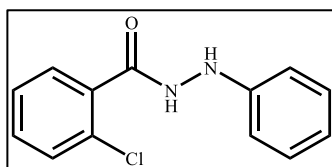

$^1\text{H}$  NMR (DMSO- $d_6$ , 300 MHz):  $\delta$  (ppm) 3.65 (bs, 1H, NH), 6.67-6.79 (m, 1H, Ar), 6.81-6.91 (m, 2H, Ar), 7.13-7.24 (m, 2H, Ar), 7.39-7.61 (m, 4H, Ar), 10.22 (s, 1H, NH).

$^{13}\text{C}$  NMR (DMSO- $d_6$ , 125 MHz):  $\delta$  (ppm) 112.82, 119.17, 127.75, 129.24, 129.68, 130.26, 130.75, 131.75, 135.76, 149.58, 166.77.

**3-chloro-*N'*-phenylbenzohydrazide (3f).** White solid. Yield 88%.

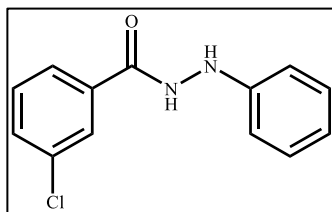

$^1\text{H}$  NMR (DMSO- $d_6$ , 300 MHz):  $\delta$  (ppm) 6.65-6.77 (m, 1H, Ar), 6.77-6.88 (m, 2H, Ar), 7.09-7.24 (m, 2H, Ar), 7.48-7.61 (m, 1H, Ar), 7.61-7.73 (m, 1H, Ar), 7.83-7.95 (m, 1H, Ar), 7.95-8.06 (m, 1H, Ar), 10.53 (s, 1H, NH).

$^{13}\text{C}$  NMR (DMSO- $d_6$ , 125 MHz):  $\delta$  (ppm) 112.86, 119.26, 126.54, 127.61, 129.25, 131.02, 131.99, 133.84, 135.48, 149.75, 165.47.

**4-chloro-*N'*-phenylbenzohydrazide (3g).** White solid. Yield 90%.

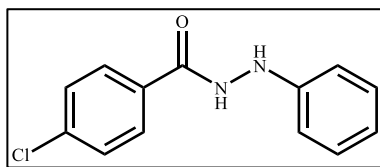

$^1\text{H}$  NMR (DMSO- $d_6$ , 300 MHz):  $\delta$  (ppm) 6.66-6.76 (m, 1H, Ar), 6.76-6.85 (m, 2H, Ar), 7.10-7.21 (m, 2H, Ar), 7.53-7.65 (m, 2H, Ar), 7.89-8.03 (m, 3H, Ar and NH), 10.47 (s, 1H, NH).

$^{13}\text{C}$  NMR (DMSO- $d_6$ , 125 MHz):  $\delta$  (ppm) 112.83, 119.22, 129.08, 129.25, 129.73, 132.25, 136.97, 149.85, 165.84.

## General procedure for synthesis of hydrazone chlorides

In according to the reaction depicted in **Scheme S2**, hydrazone chlorides were synthesized through a modified procedure reported in literature [2].

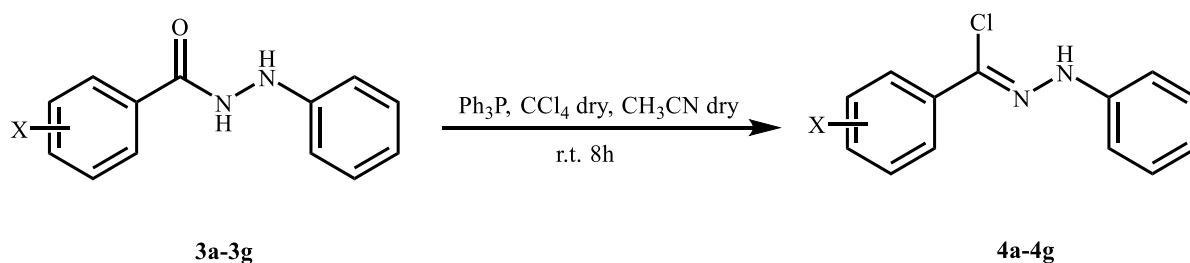

| Entry | R <sup>1</sup>     | Reagent   | Product   |
|-------|--------------------|-----------|-----------|
| 1     | H                  | <b>3a</b> | <b>4a</b> |
| 2     | 4-OCH <sub>3</sub> | <b>3b</b> | <b>4b</b> |
| 3     | 4-CH <sub>3</sub>  | <b>3c</b> | <b>4c</b> |
| 4     | 4-NO <sub>2</sub>  | <b>3d</b> | <b>4d</b> |
| 5     | 2-Cl               | <b>3e</b> | <b>4e</b> |
| 6     | 3-Cl               | <b>3f</b> | <b>4f</b> |
| 7     | 4-Cl               | <b>3g</b> | <b>4g</b> |

**Scheme S2.** Synthesis of variously substituted hydrazone chlorides **4a-4g**.

In 500 ml two-necked round-bottomed flask, equipped with magnetic stir bar, opportune benzoyl phenylhydrazine **3a-3g** (59.7 mmol, 1 eq) was suspended under nitrogen in dry acetonitrile (100 ml). Subsequently, triphenylphosphine (74.6 mmol, 1.25 eq) and dry carbon tetrachloride (89.6 mmol, 1.5 eq) were respectively added. The reaction mixture was stirred at room temperature for 4h. During the reaction course, suspended benzoyl phenylhydrazine completely dissolved and then, the formation of a solid was observed. At the end of the reaction, the solution was cooled in an ice-bath and the solid was recuperate by filtration and washed with small quantity of acetonitrile. The obtained solid was recrystallized with acetonitrile.

***N*-phenylbenzohydrazonyl chloride (4a).** White solid. Yield 80%.

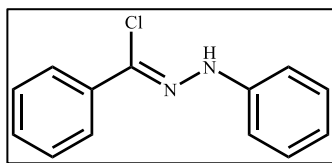

$^1\text{H}$  NMR (DMSO- $d_6$ , 300 MHz):  $\delta$  (ppm) 6.82-6.96 (m, 1H, Ar), 7.23-7.33 (m, 2H, Ar), 7.33-7.41 (m, 2H, Ar), 7.42-7.60 (m, 3H, Ar), 7.83-8.00 (m, 2H, Ar), 9.92 (s, 1H, NH).

$^{13}\text{C}$  NMR (DMSO- $d_6$ , 125 MHz):  $\delta$  (ppm) 114.06, 120.96, 122.73, 126.44, 129.22, 129.59, 129.65, 134.82, 144.61.

**4-methoxy-*N*-phenylbenzohydrazonyl chloride (4b).** White solid. Yield 88%.

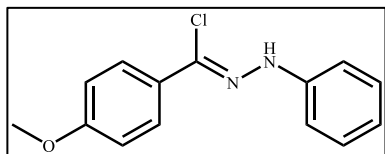

$^1\text{H}$  NMR ( $\text{CDCl}_3$ , 300 MHz):  $\delta$  (ppm) 3.84 (s, 3H,  $\text{CH}_3$ ), 6.86-6.98 (m, 3H, Ar), 7.11-7.20 (m, 2H, Ar), 7.25-7.35 (m, 2H, Ar), 7.80-7.89 (m, 2H, Ar), 7.93 (bs, 1H, NH).

$^{13}\text{C}$  NMR ( $\text{CDCl}_3$ , 125 MHz):  $\delta$  (ppm) 55.36, 113.27, 113.77, 120.83, 124.71, 127.15, 127.88, 129.31, 143.57, 160.54.

**4-methyl-*N*-phenylbenzohydrazonyl chloride (4c).** White solid. Yield 84%.

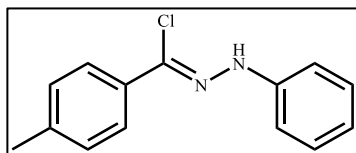

$^1\text{H}$  NMR ( $\text{CDCl}_3$ , 300 MHz):  $\delta$  (ppm) 2.38 (s, 3H,  $\text{CH}_3$ ), 6.87-6.98 (m, 1H, Ar), 7.11-7.25 (m, 4H, Ar), 7.25-7.36 (m, 2H, Ar), 7.75-7.87 (m, 2H, Ar), 7.98 (bs, 1H, NH).

$^{13}\text{C}$  NMR ( $\text{CDCl}_3$ , 125 MHz):  $\delta$  (ppm) 21.25, 113.35, 120.98, 124.93, 126.36, 129.09, 129.34, 131.76, 139.38, 143.46.

**4-nitro-*N*-phenylbenzohydrazonyl chloride (4d).** Red solid. Yield 80%.

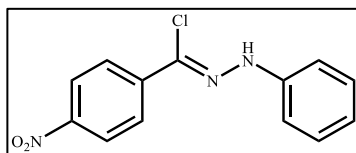

$^1\text{H}$  NMR ( $\text{CDCl}_3$ , 300 MHz):  $\delta$  (ppm) 6.95-7.08 (m, 1H, Ar), 7.16-7.24 (m, 2H, Ar), 7.30-7.41 (m, 2H, Ar), 8.00-8.10 (m, 2H, Ar), 8.19-8.33 (m, 3H, Ar and NH).

$^{13}\text{C}$  NMR ( $\text{CDCl}_3$ , 125 MHz):  $\delta$  (ppm) 113.79, 122.10, 122.22, 123.72, 126.58, 129.51, 140.14, 142.39, 147.60.

**2-chloro-*N*-phenylbenzohydrazonyl chloride (4e).** White solid. Yield 78%.

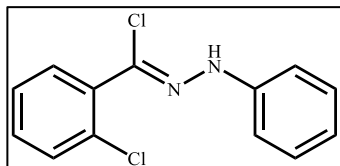

$^1\text{H}$  NMR ( $\text{CDCl}_3$ , 300 MHz):  $\delta$  (ppm) 6.88-6.99 (m, 1H, Ar), 7.09-7.19 (m, 2H, Ar), 7.21-7.37 (m, 4H, Ar), 7.40-7.50 (m, 1H, Ar), 7.55-7.64 (m, 1H, Ar), 8.07 (bs, 1H, NH).

$^{13}\text{C}$  NMR ( $\text{CDCl}_3$ , 125 MHz):  $\delta$  (ppm) 113.48, 120.41, 121.35, 126.68, 129.35, 130.24, 130.57, 131.24, 132.91, 134.19, 143.12.

**3-chloro-*N*-phenylbenzohydrazonyl chloride (4f).** White solid. Yield 83%.

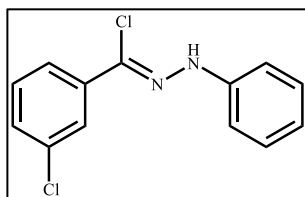

$^1\text{H}$  NMR ( $\text{CDCl}_3$ , 300 MHz):  $\delta$  (ppm) 6.90-7.01 (m, 1H, Ar), 7.12-7.21 (m, 2H, Ar), 7.26-7.38 (m, 4H, Ar), 7.74-7.83 (m, 1H, Ar), 7.85-7.94 (m, 1H, Ar), 8.06 (bs, 1H, NH).

$^{13}\text{C}$  NMR ( $\text{CDCl}_3$ , 125 MHz):  $\delta$  (ppm) 113.53, 121.51, 122.97, 124.41, 126.22, 129.03, 129.41, 129.56, 134.52, 136.15, 142.96.

**4-chloro-*N*-phenylbenzohydrazonyl chloride (4g).** White solid. Yield 84%.

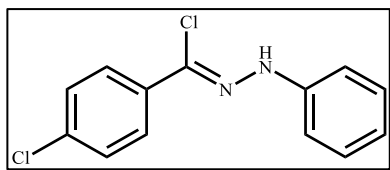

$^1\text{H}$  NMR ( $\text{CDCl}_3$ , 300 MHz):  $\delta$  (ppm) 6.90-7.00 (m, 1H, Ar), 7.12-7.21 (m, 2H, Ar), 7.26-7.41 (m, 4H, Ar), 7.79-7.89 (m, 2H, Ar), 8.03 (bs, 1H, NH).

$^{13}\text{C}$ -NMR ( $\text{CDCl}_3$ , 125 MHz):  $\delta$  (ppm) 113.46, 121.38, 123.47, 127.49, 128.59, 129.39, 132.94, 135.10, 143.09.

### General procedure for synthesis of [mPy]OTf

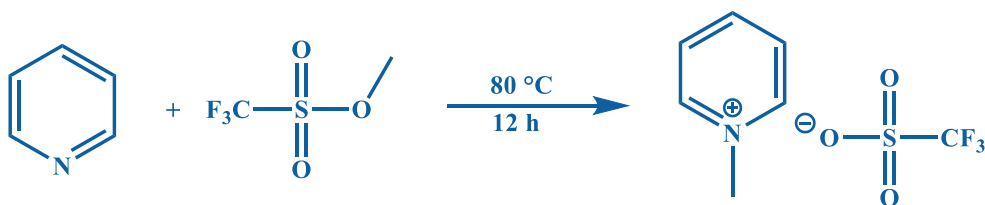

The ionic liquid [mPy][OTf] was prepared in total halide free direct synthesis in according to literature procedure [3]. Specifically, 0.29 mols of dry pyridine was placed in a two-necked flask and 0.30 mols of methyltrifluoromethanesulfonate dropwise was added. The mixture was reacted at 80 °C for 12 hours. The crude product was washed with diethyl ether and dried under vacuum, providing 68.04 gr (yield 96%) of pure ionic liquid.

## Characterization spectra of benzoyl phenylhydrazines

### N'-phenylbenzohydrazide (3a)

#### $^1\text{H}$ NMR

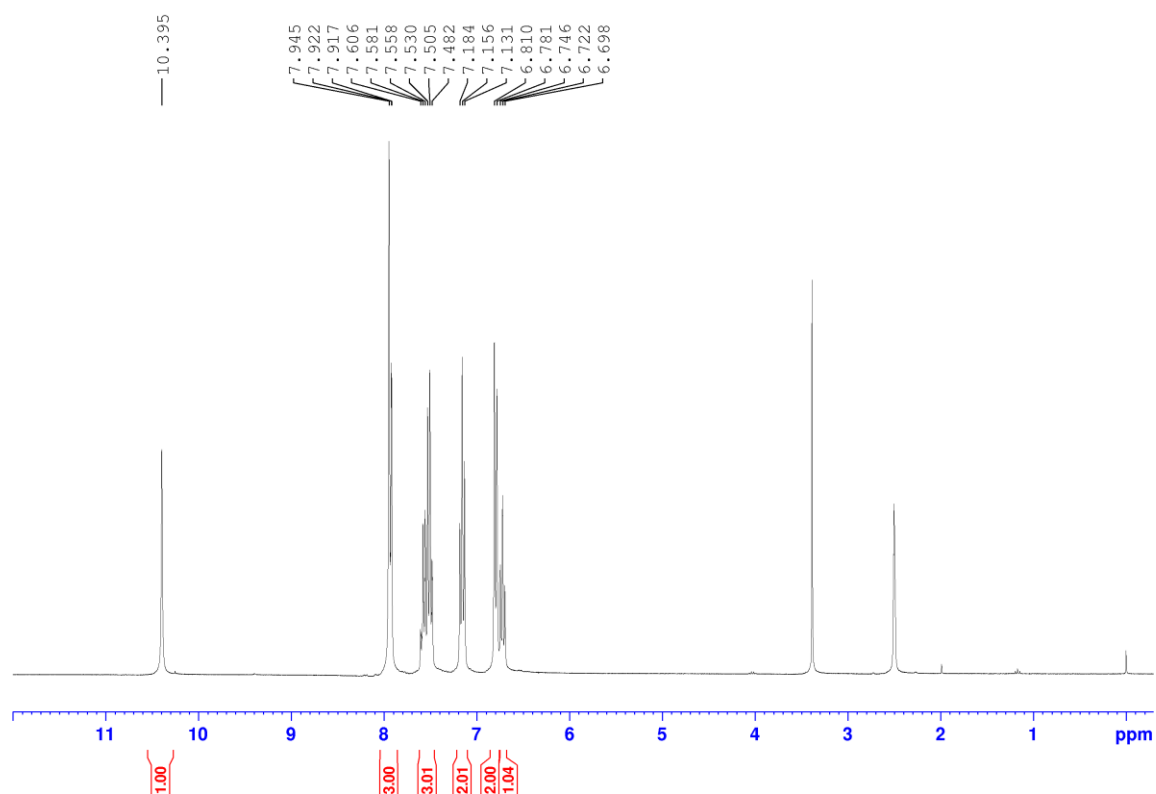

# $^{13}\text{C}$ NMR

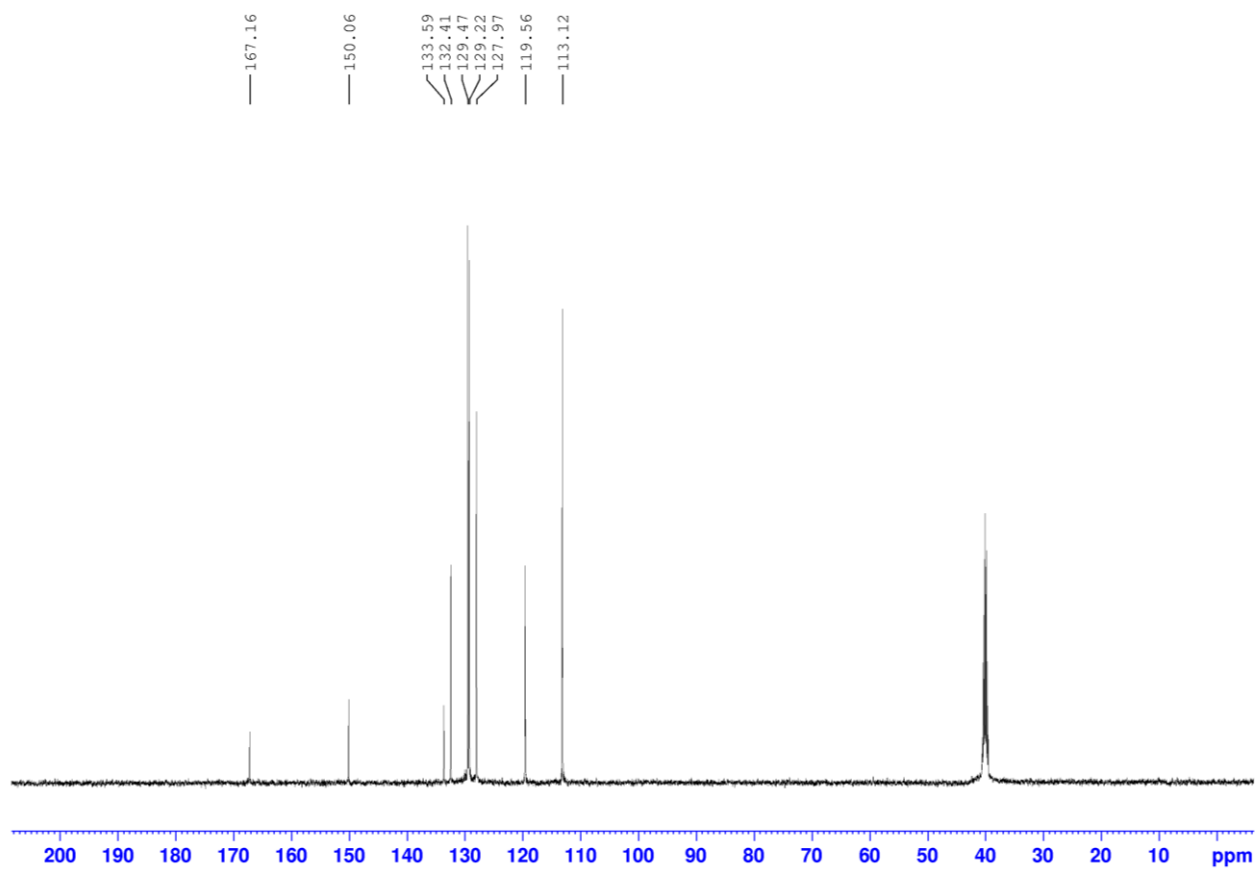



## 4-methoxy-N'-phenylbenzohydrazide (3b)

### $^1\text{H}$ NMR

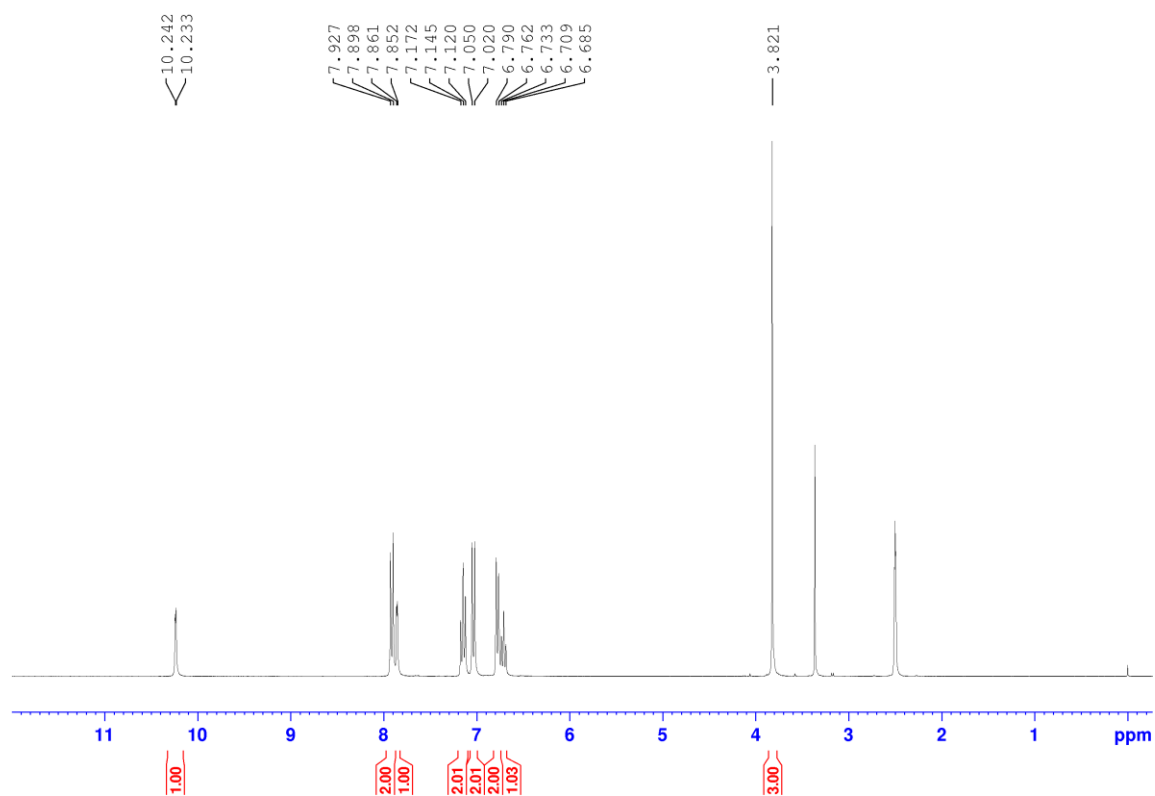

# $^{13}\text{C}$ NMR

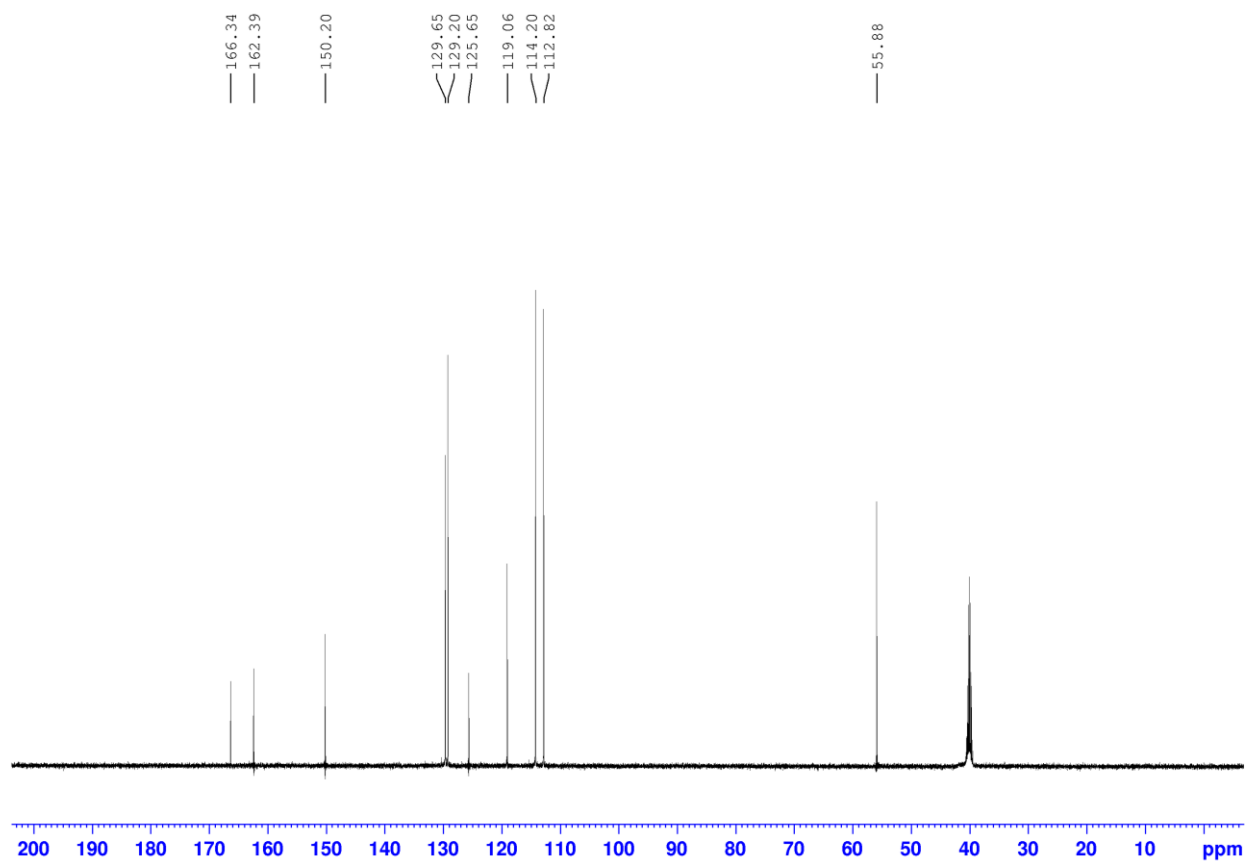

## 4-methyl-N'-phenylbenzohydrazide (3c)

### $^1\text{H}$ NMR

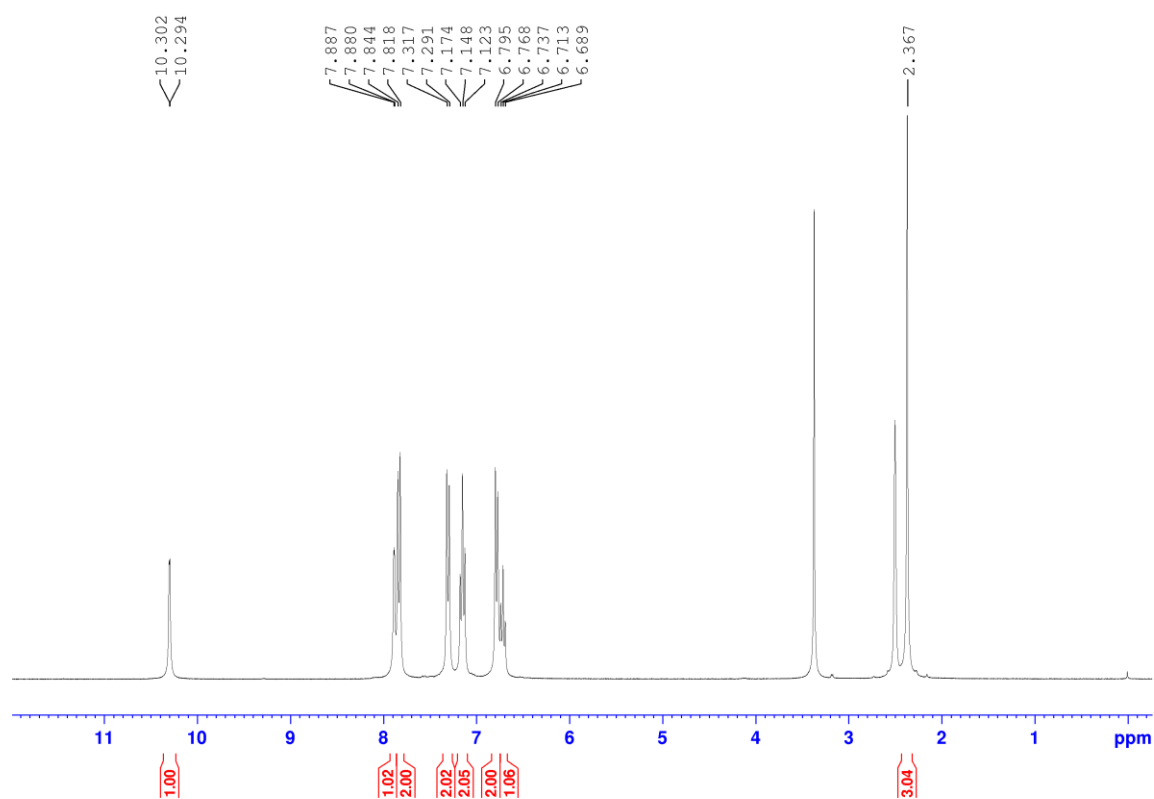

# $^{13}\text{C}$ NMR

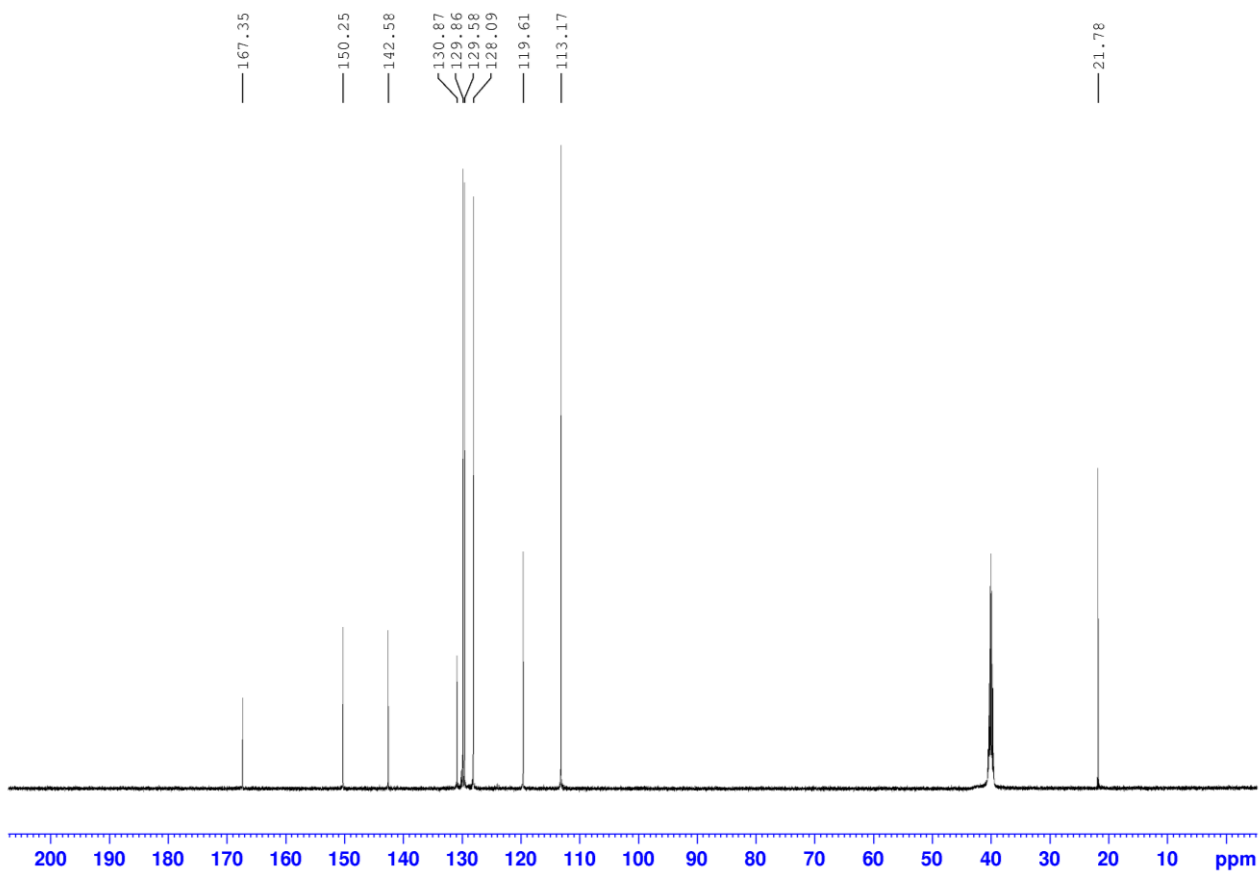

## 4-nitro-N'-phenylbenzohydrazide (3d)

### $^1\text{H}$ NMR

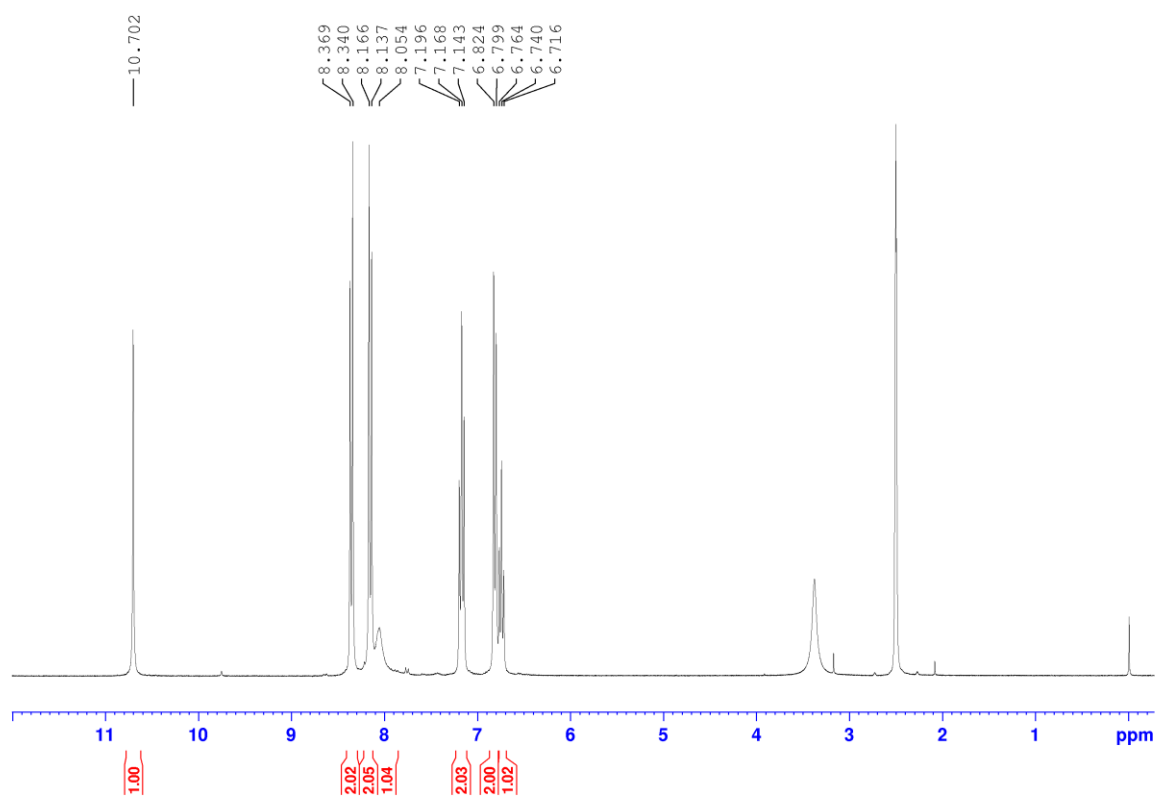

# $^{13}\text{C}$ NMR

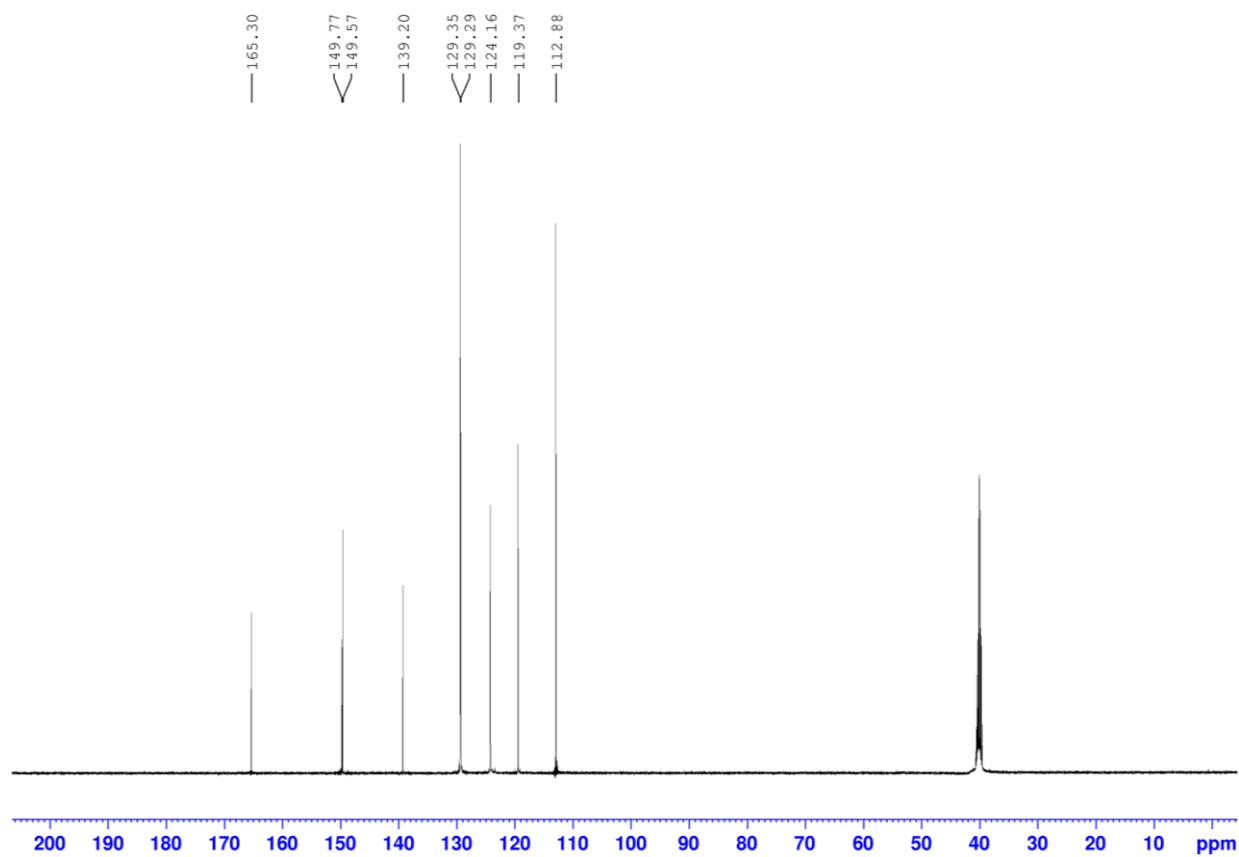

## 2-chloro-N'-phenylbenzohydrazide (3e)

### $^1\text{H}$ NMR

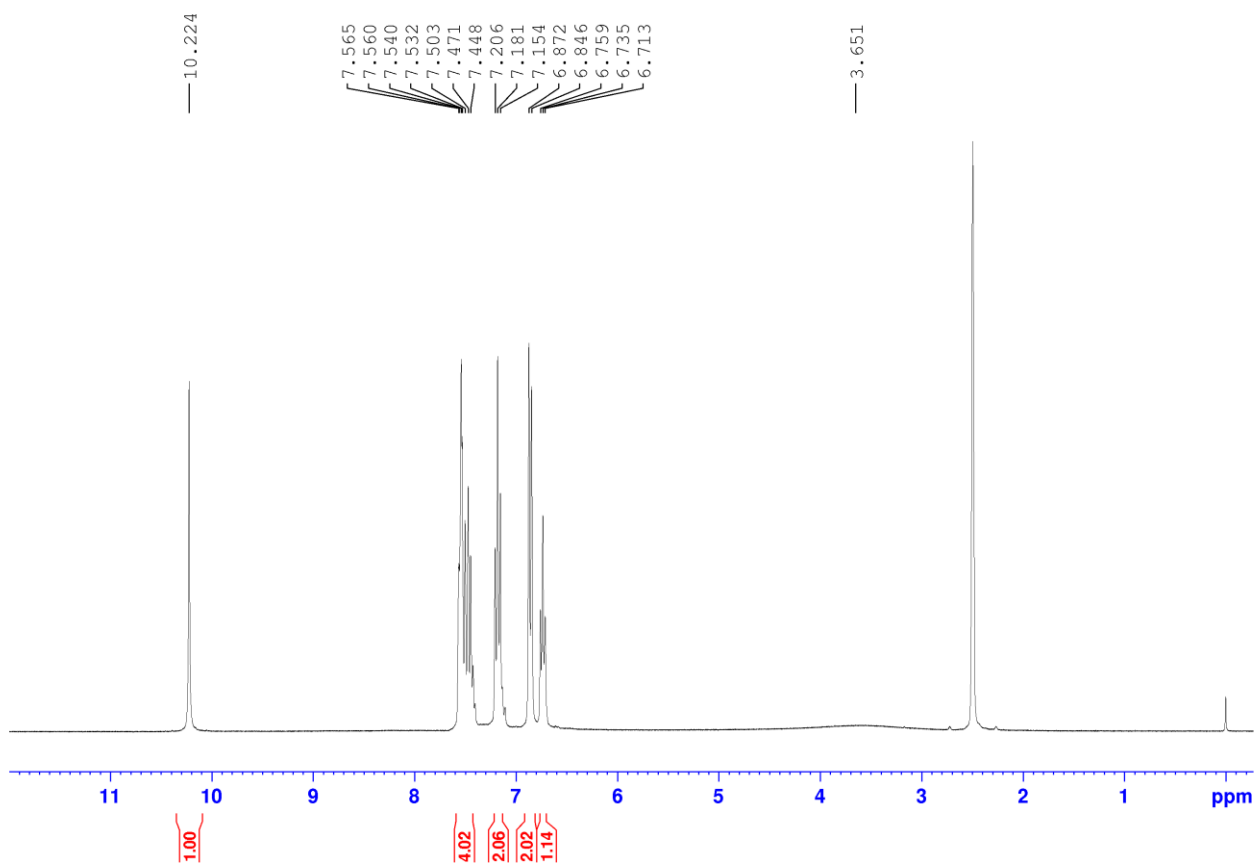

# $^{13}\text{C}$ NMR

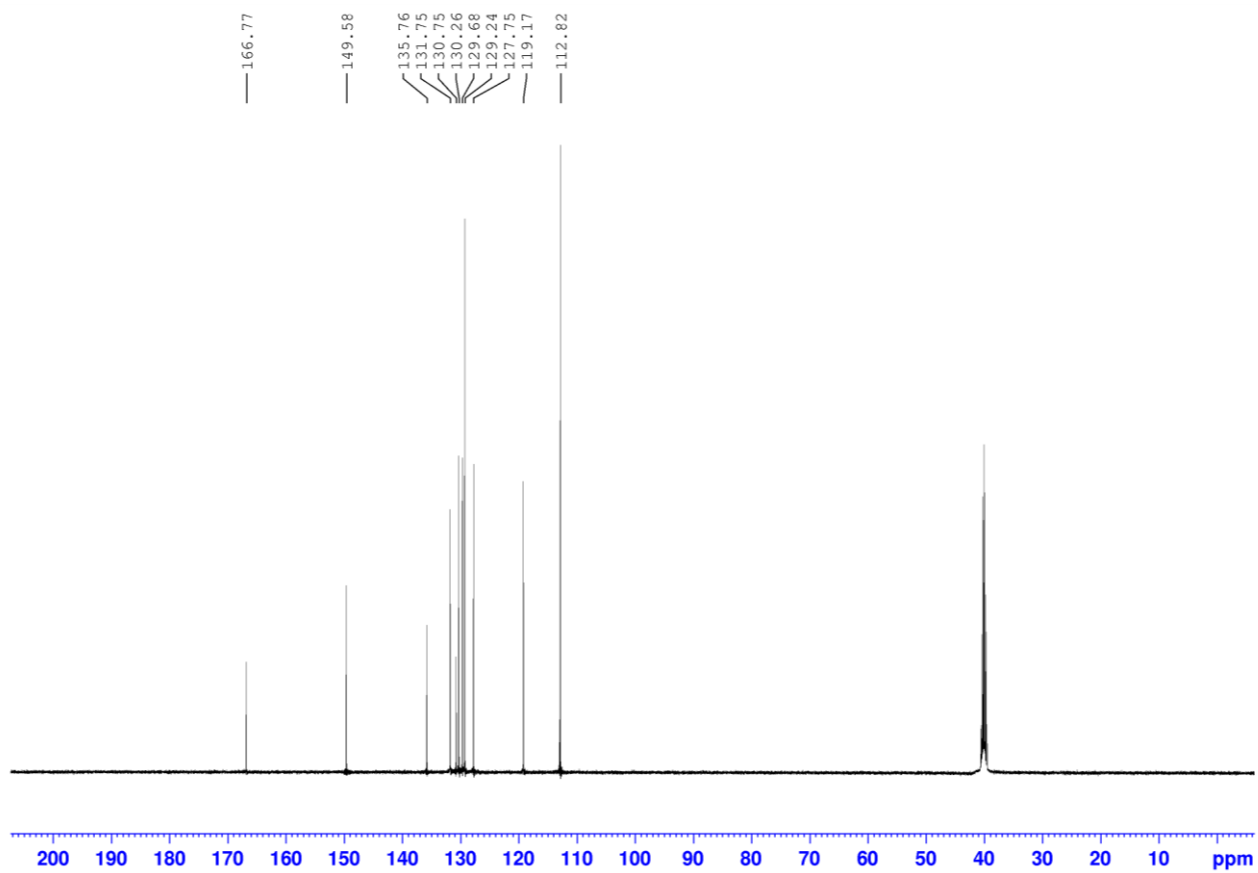



### 3-chloro-N'-phenylbenzohydrazide (3f)

#### $^1\text{H}$ NMR

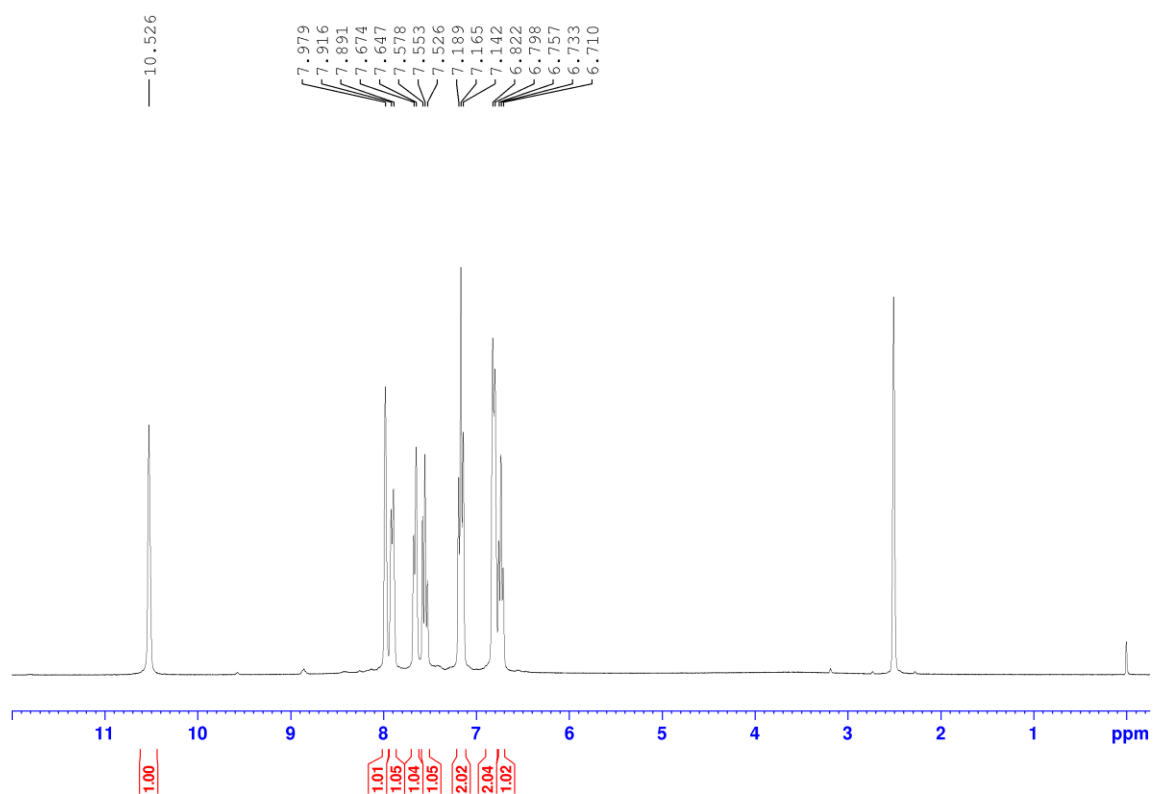

# $^{13}\text{C}$ NMR

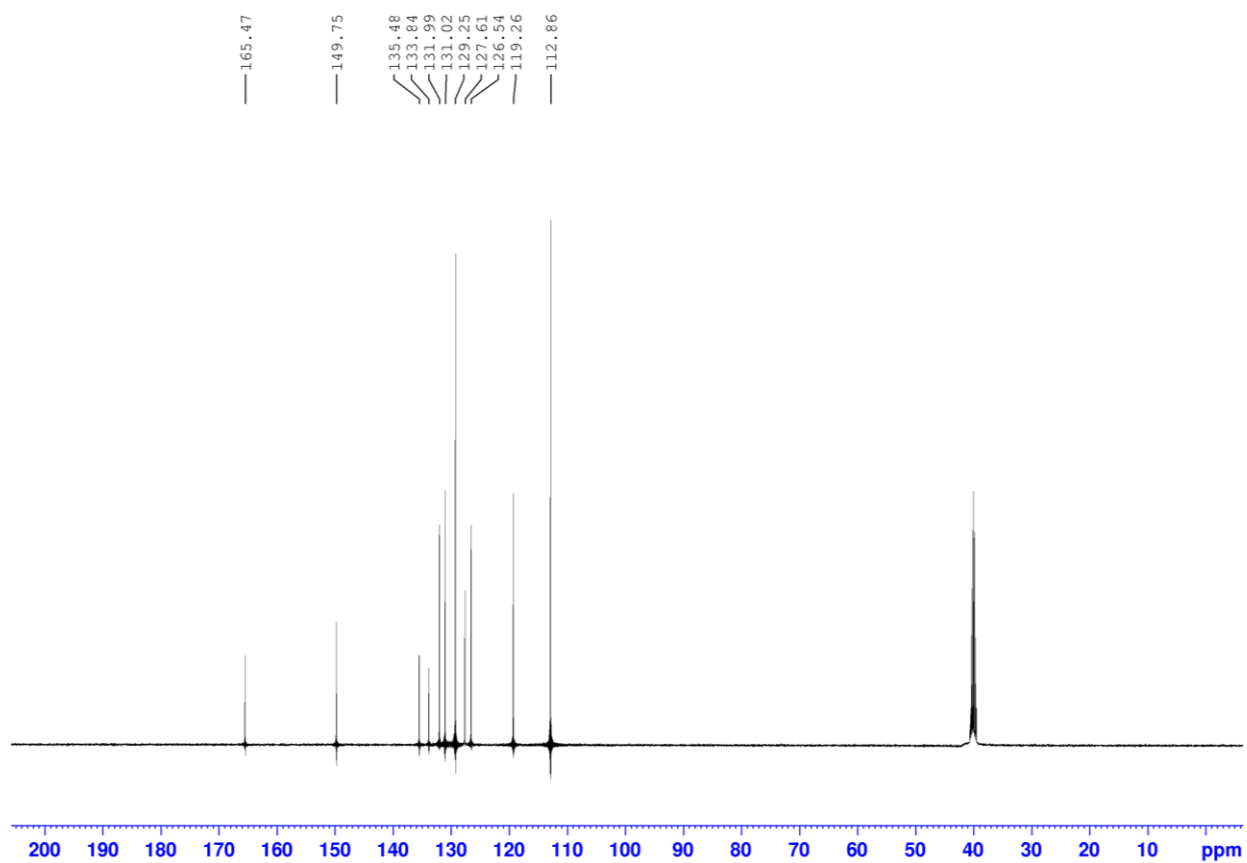

# 4-chloro-N'-phenylbenzohydrazide (3g)

## <sup>1</sup>H NMR

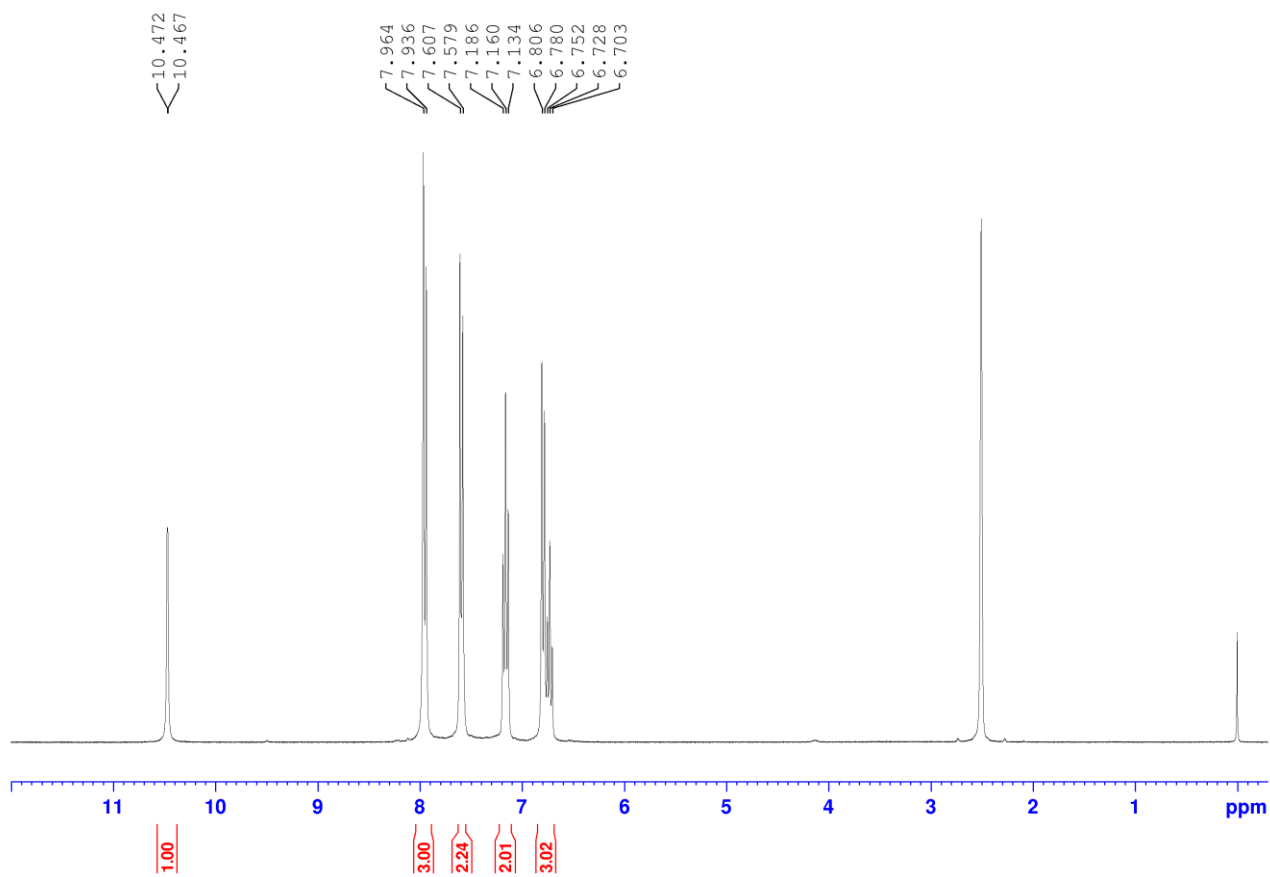

# $^{13}\text{C}$ NMR

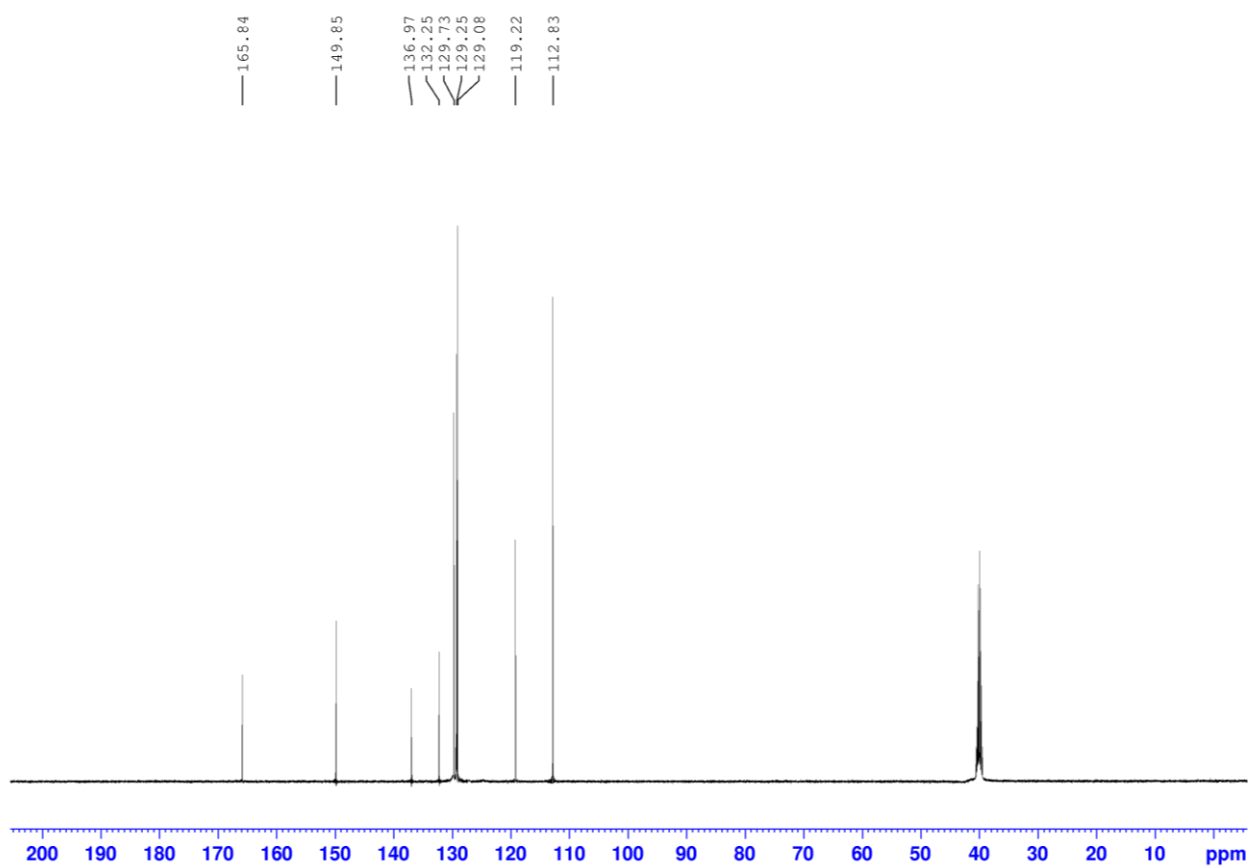

## Characterization spectra of hydrazoneyl chlorides

### *N*-phenylbenzohydrazonyl chloride (4a)

#### $^1\text{H}$ NMR

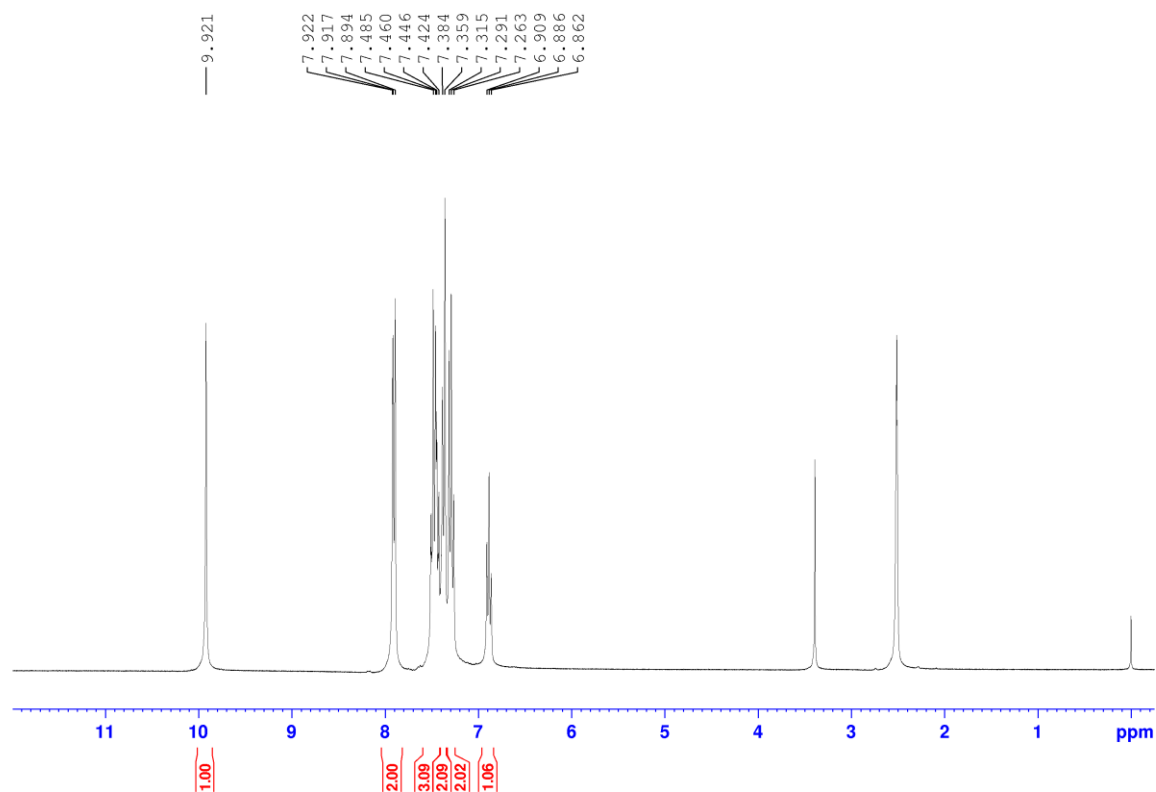

# <sup>13</sup>C NMR

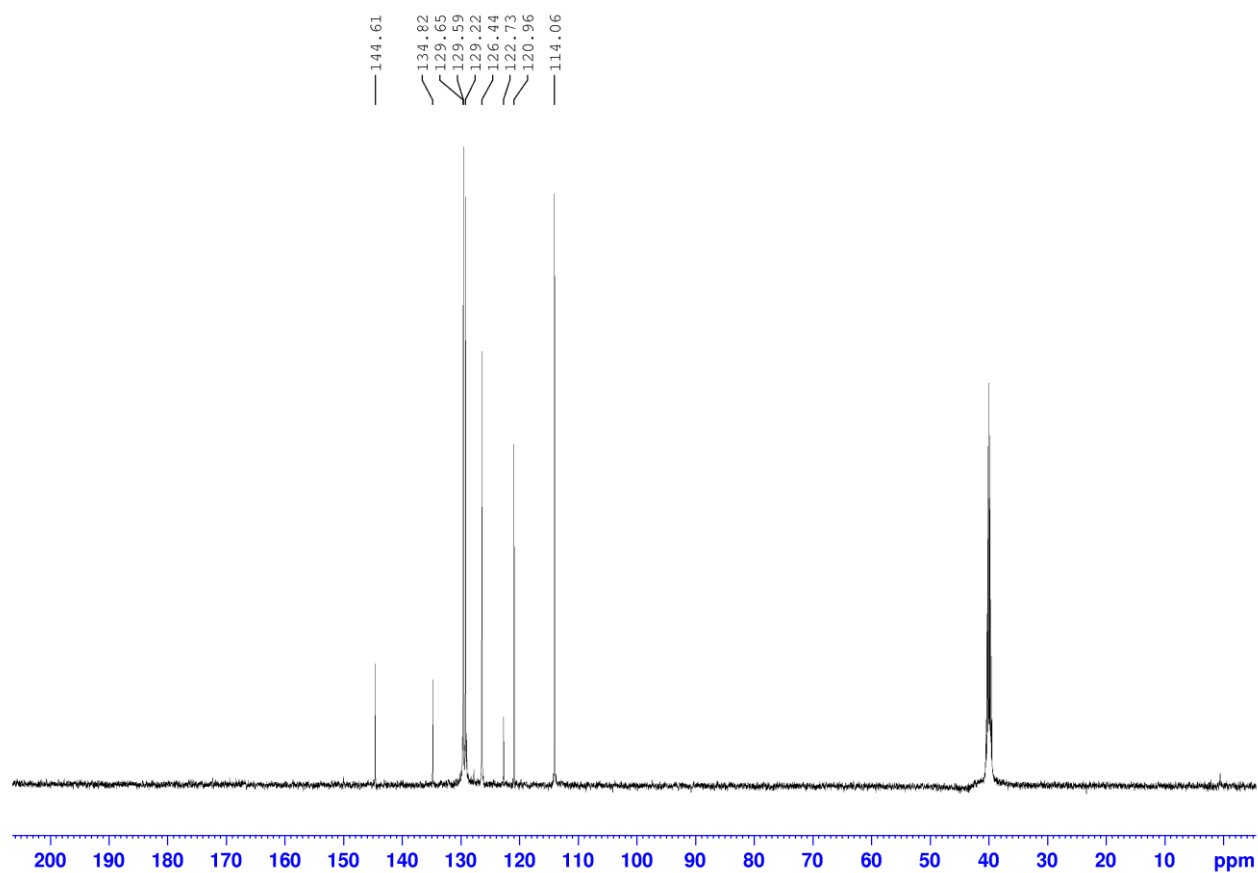

## 4-methoxy-N-phenylbenzohydrazonyl chloride (4b)

### $^1\text{H}$ NMR

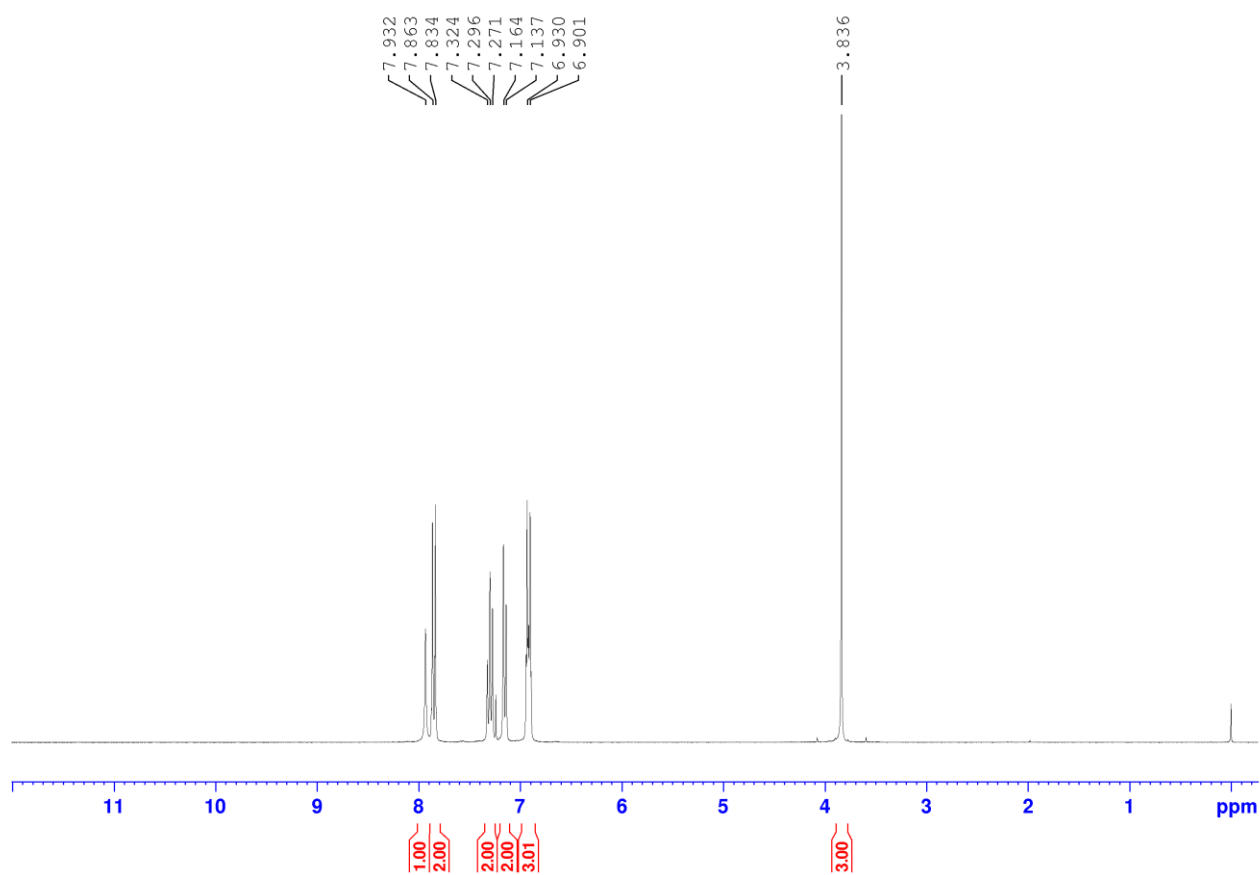

# $^{13}\text{C}$ NMR

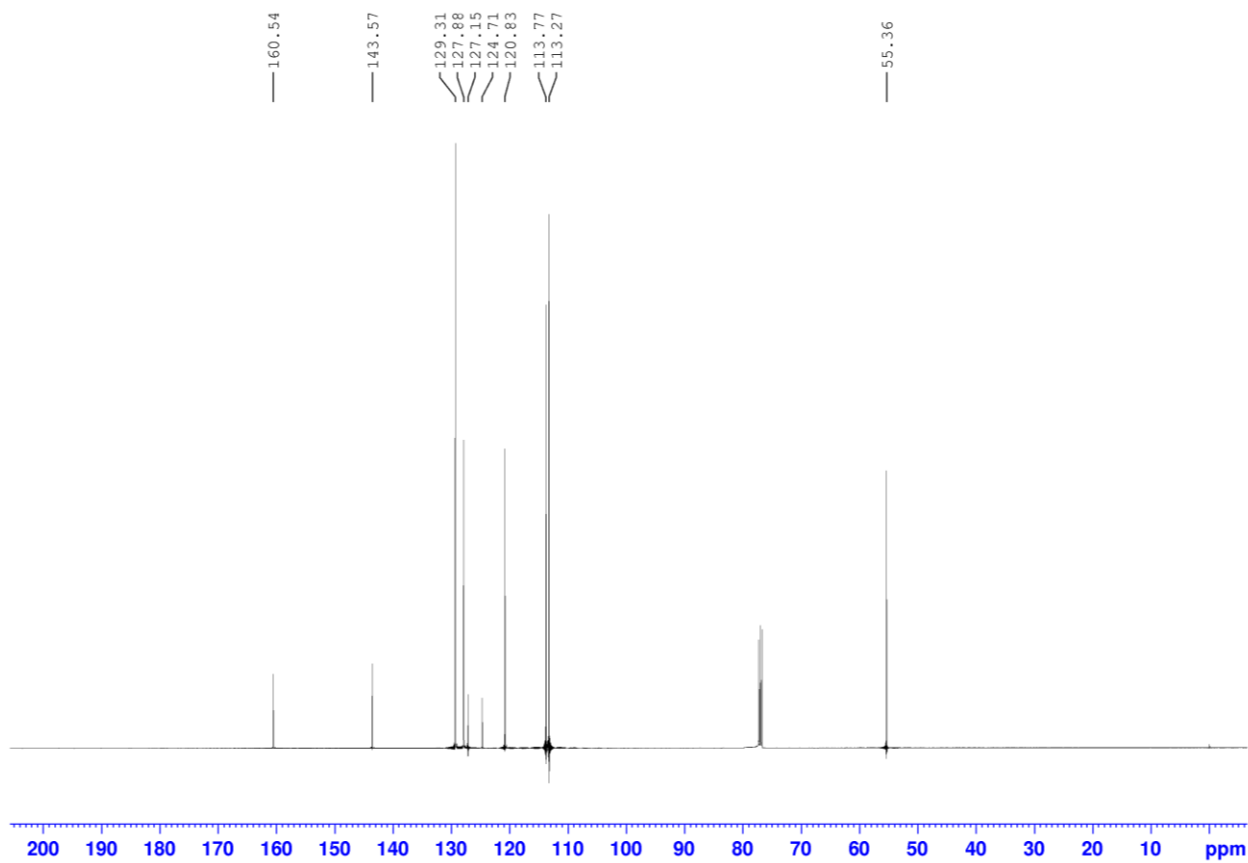



## 4-methyl-N-phenylbenzohydrazonyl chloride (4c)

### $^1\text{H}$ NMR

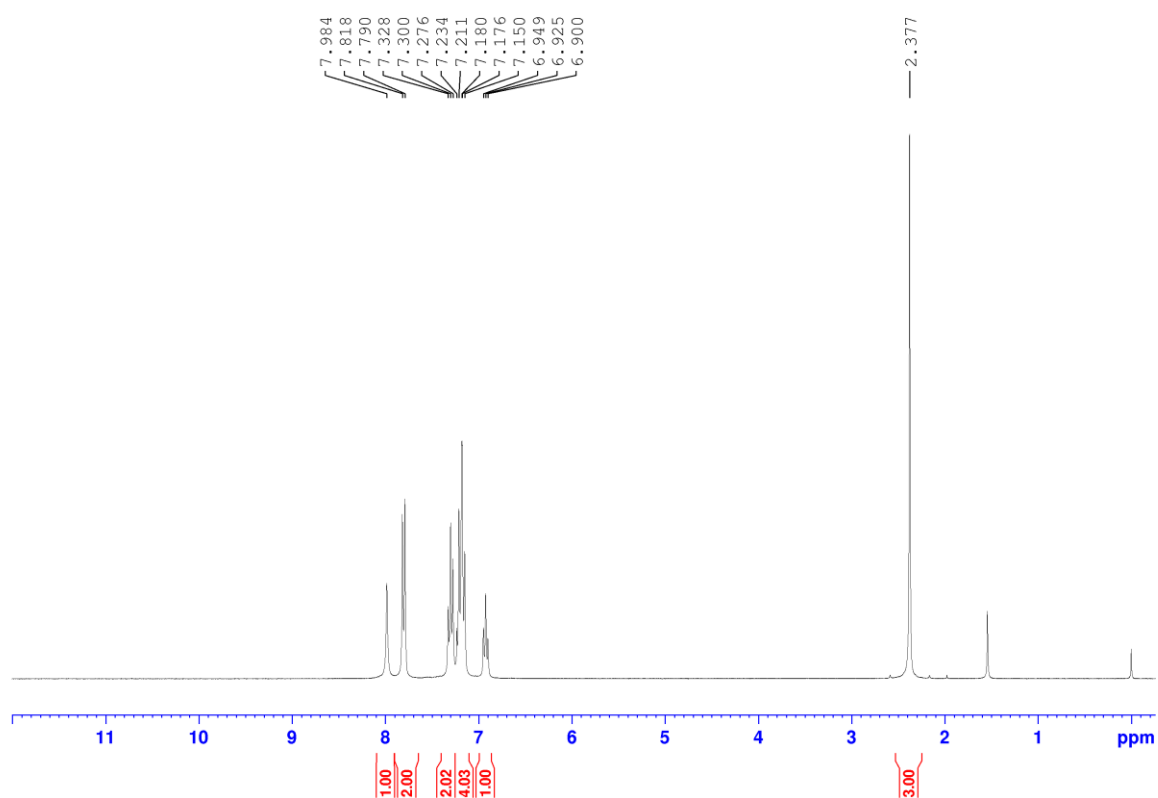

# $^{13}\text{C}$ NMR

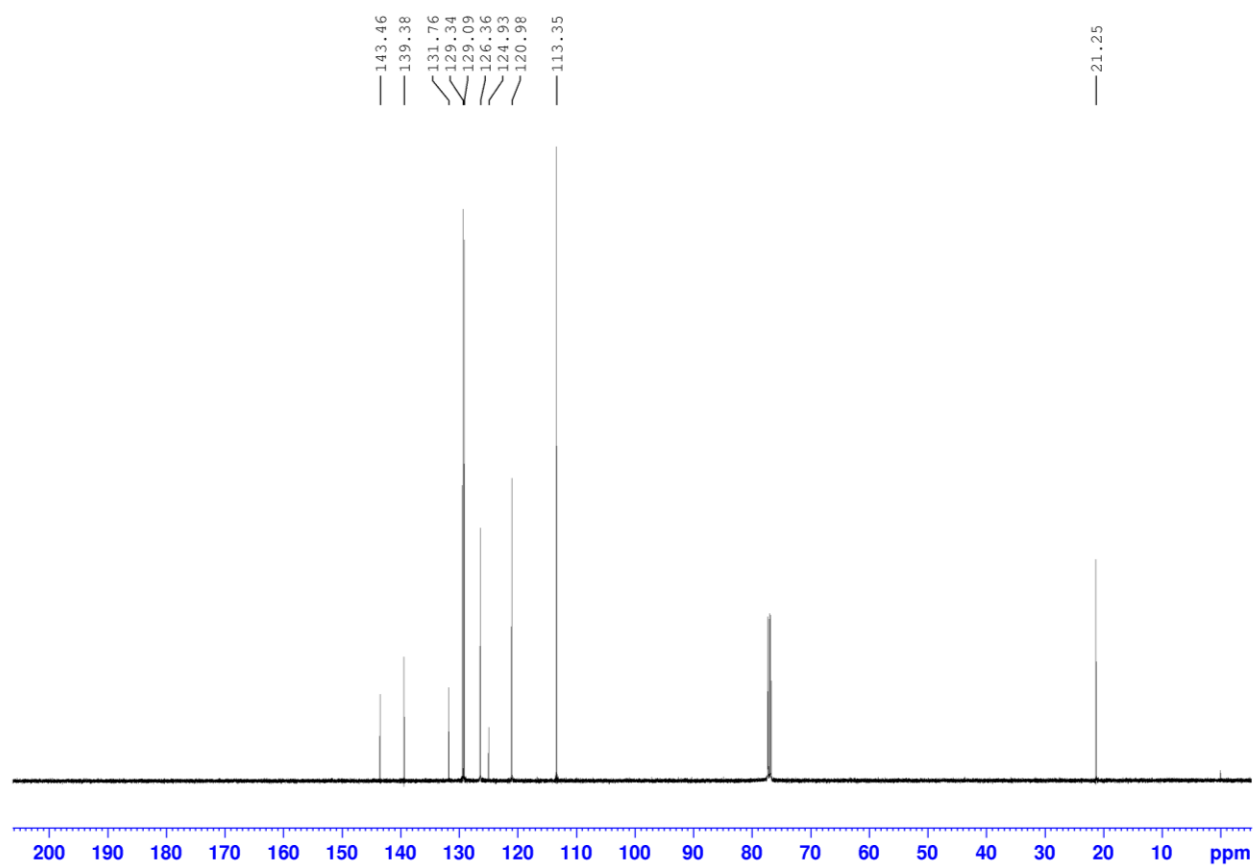

# 4-nitro-N-phenylbenzohydrazonyl chloride (4d)

## $^1\text{H}$ NMR

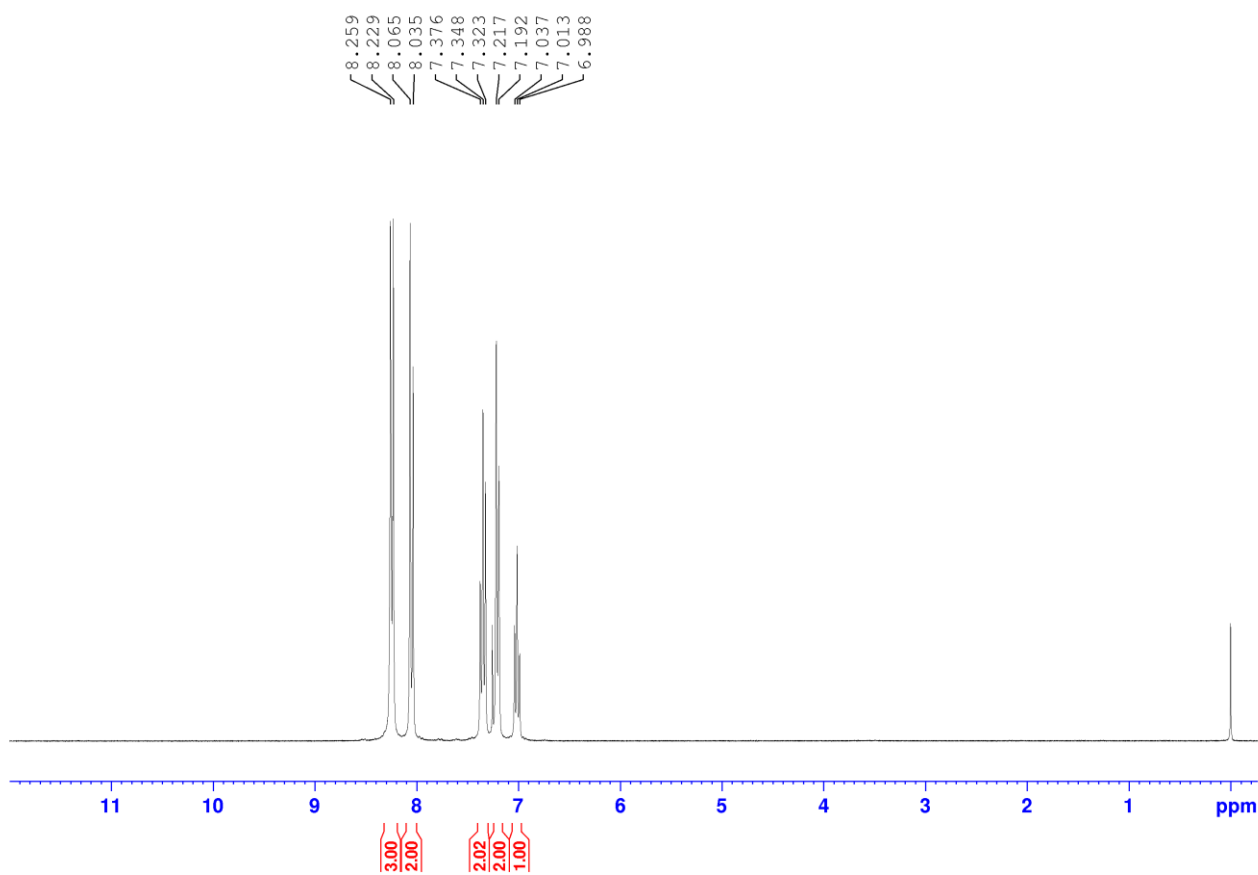

# $^{13}\text{C}$ NMR

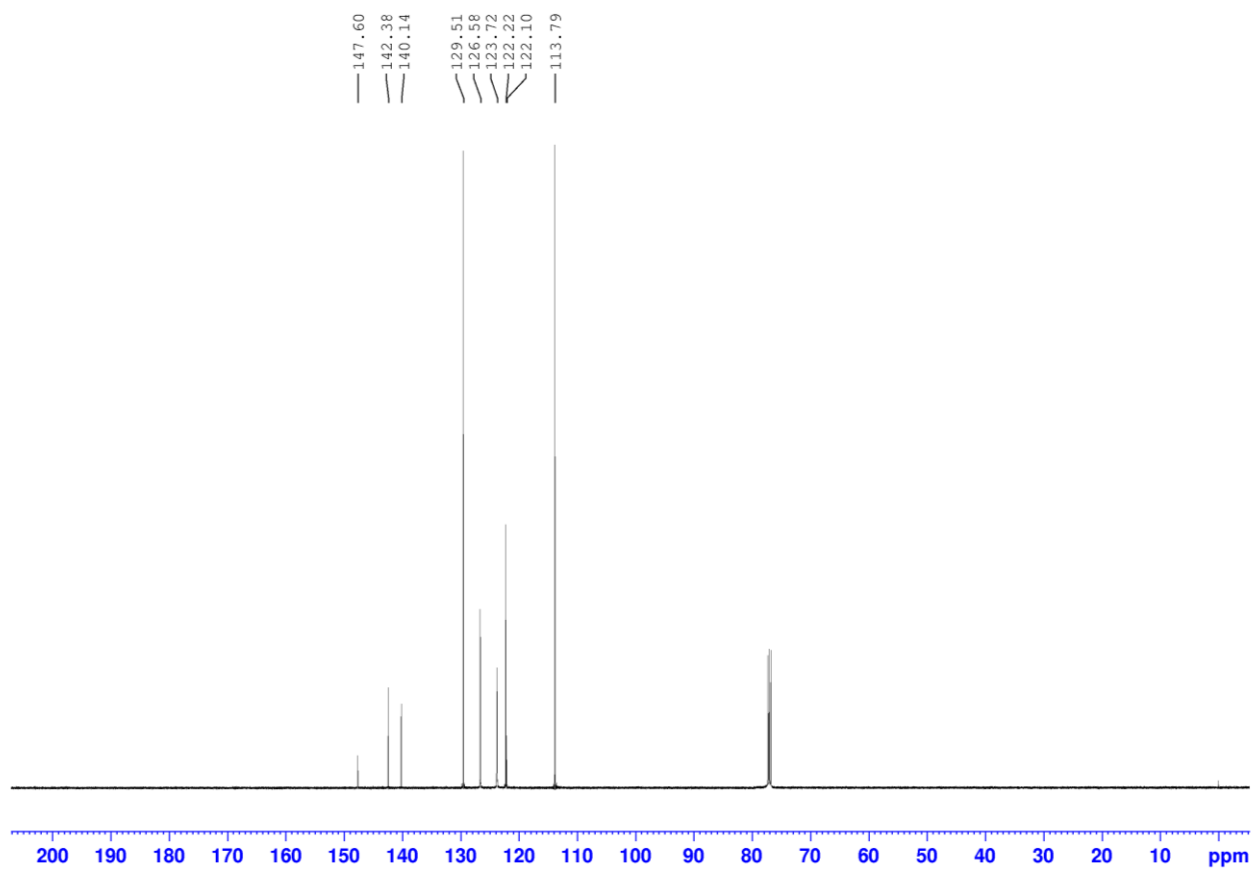

## 2-chloro-N-phenylbenzohydrazonyl chloride (4e)

### $^1\text{H}$ NMR

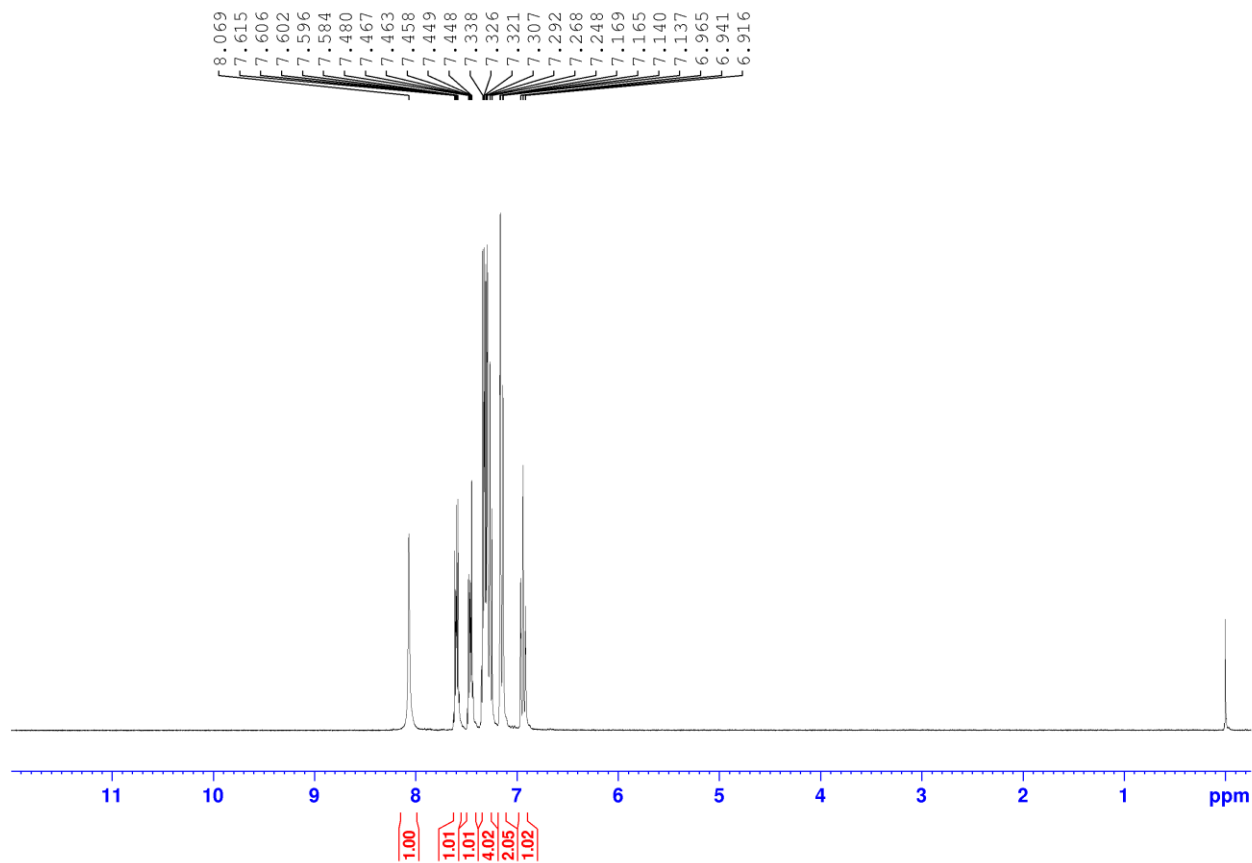

**$^{13}\text{C}$  NMR**

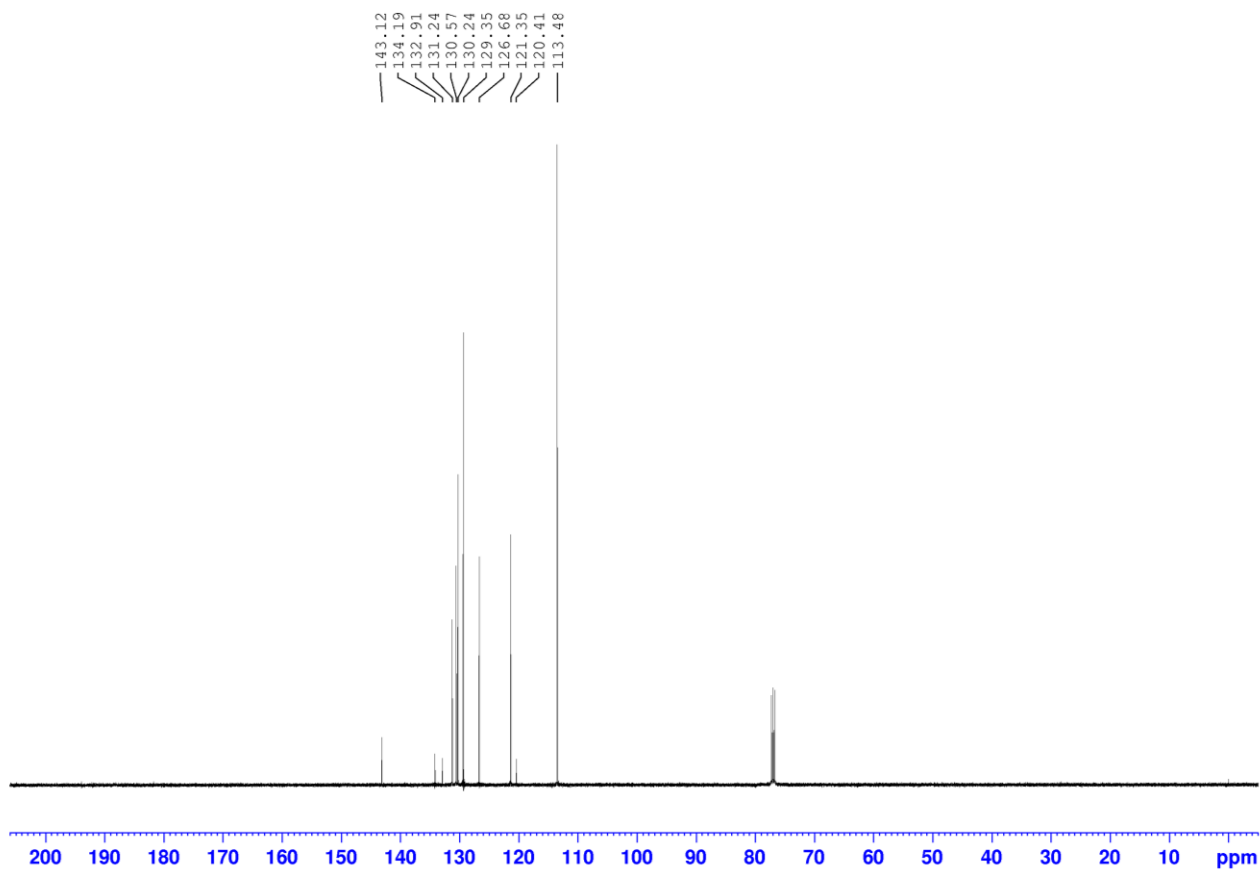

### 3-chloro-N-phenylbenzohydrazonyl chloride (4f)

#### $^1\text{H}$ NMR

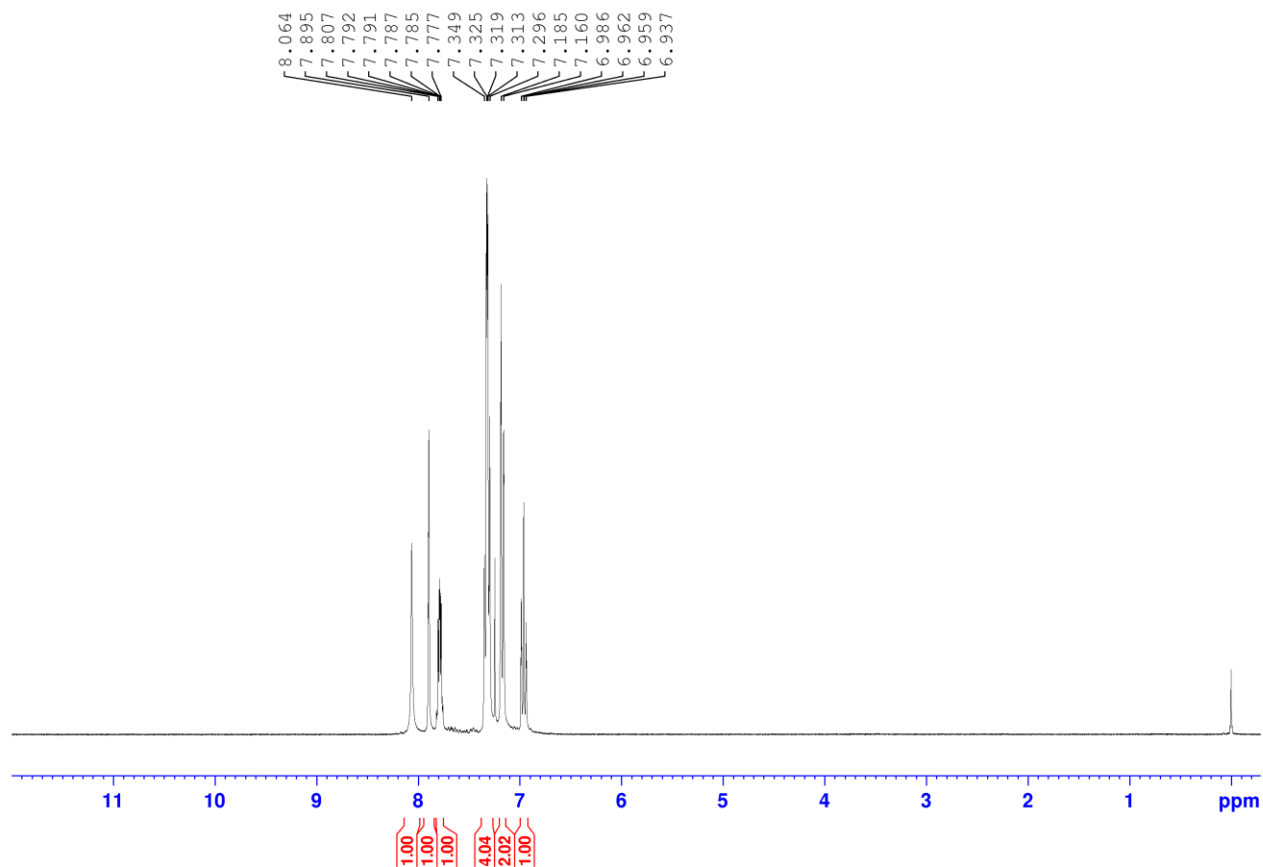

**$^{13}\text{C}$  NMR**

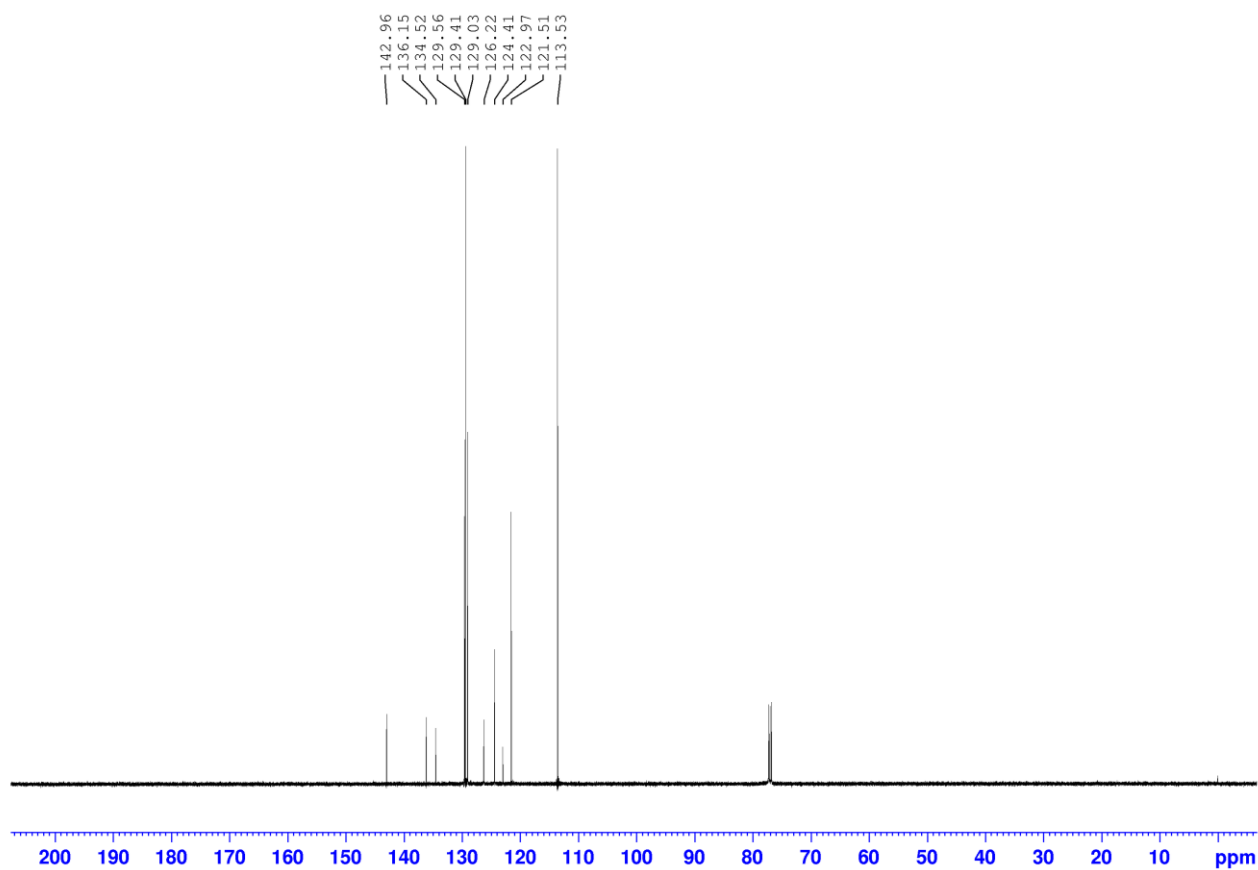



## 4-chloro-N-phenylbenzohydrazonyl chloride (4g)

### $^1\text{H}$ NMR

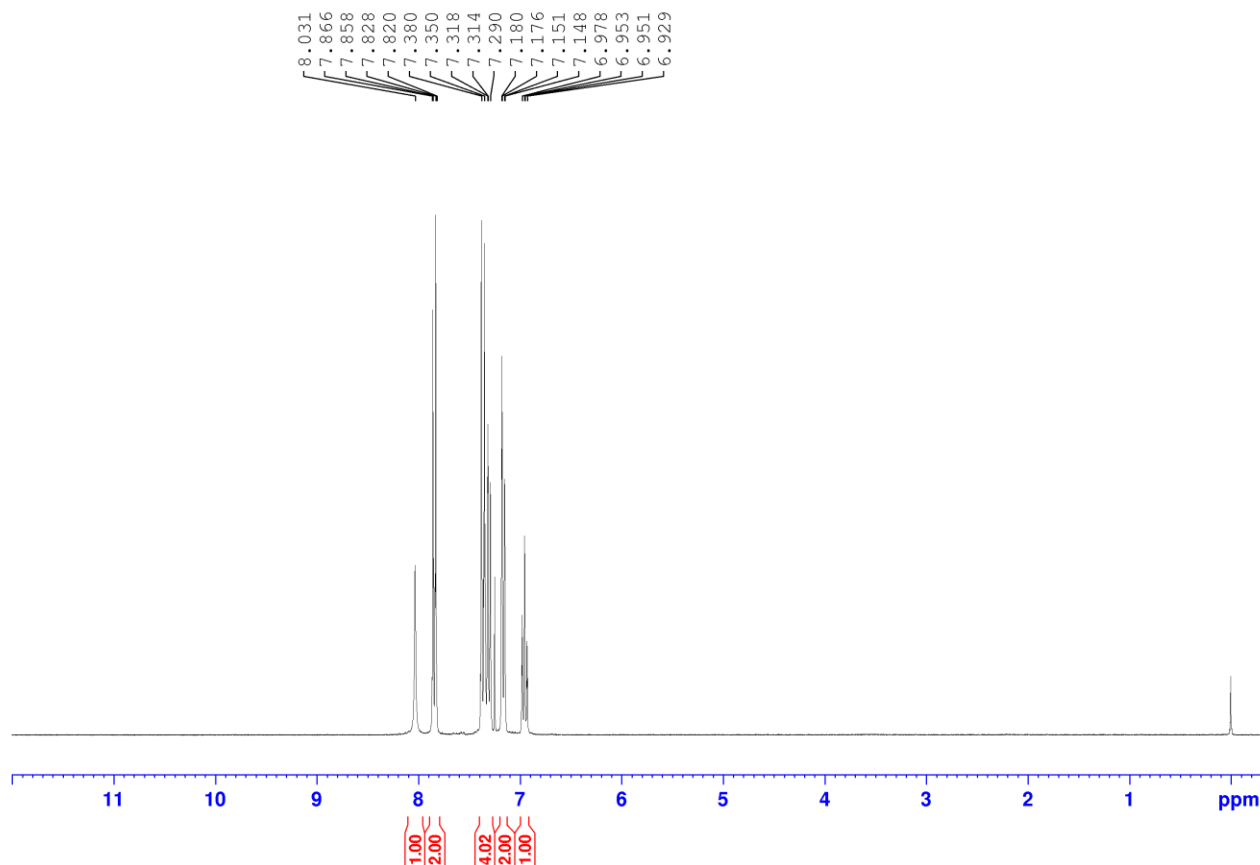

**$^{13}\text{C}$  NMR**

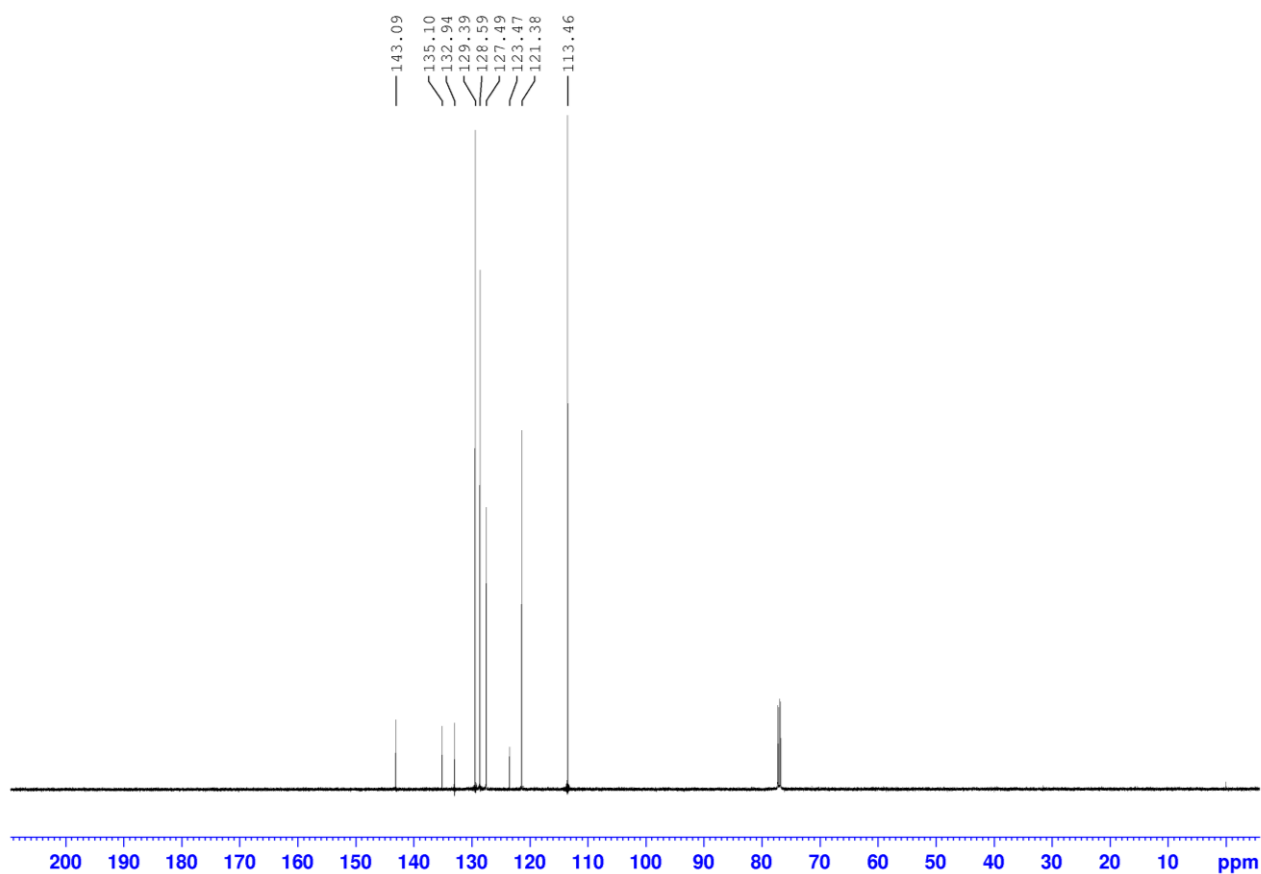

## Characterization spectra of 1,3,4,5-tetrasubstituted pyrazoles

### 1-(5-Methyl-1,3-diphenyl-1*H*-pyrazol-4-yl)ethanone (6a)

#### <sup>1</sup>H NMR

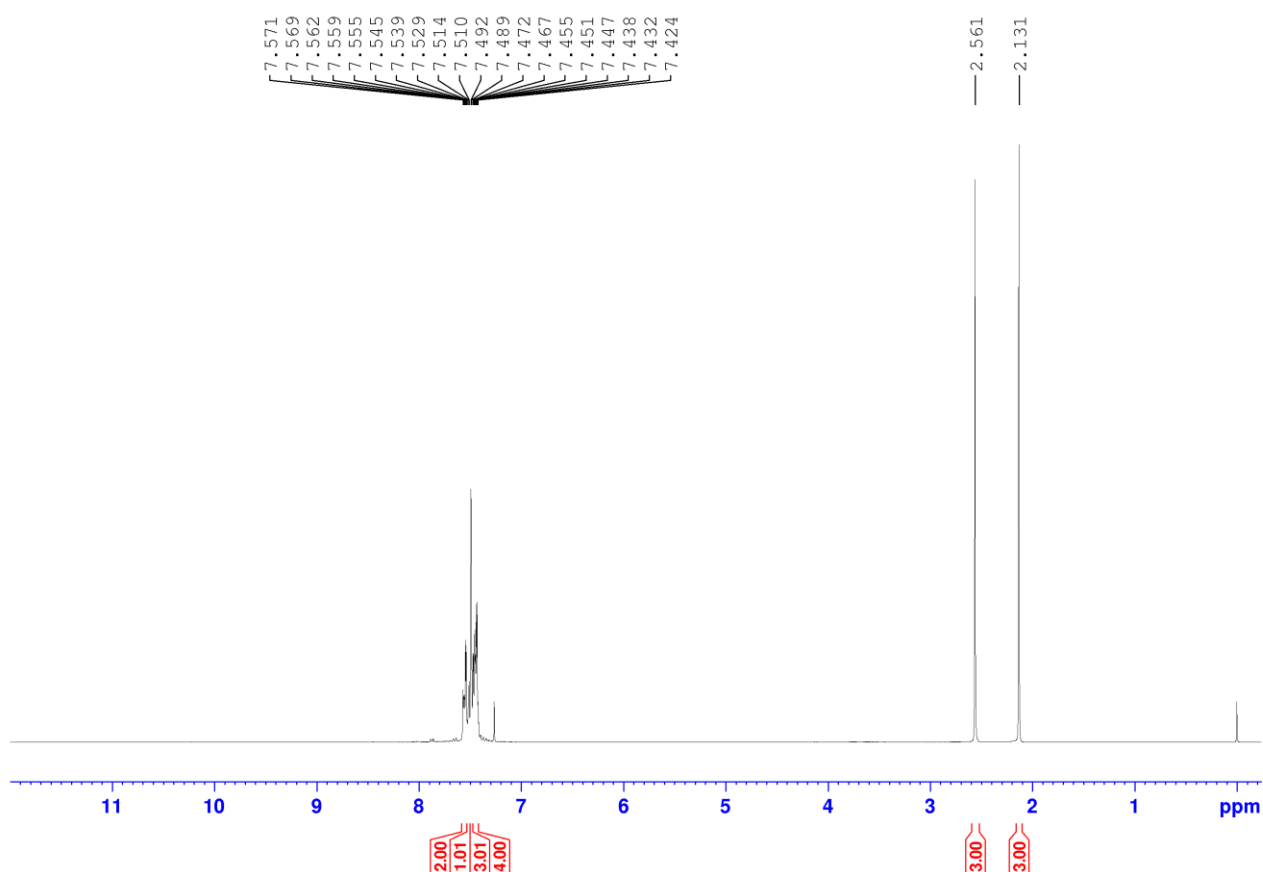

# $^{13}\text{C}$ NMR

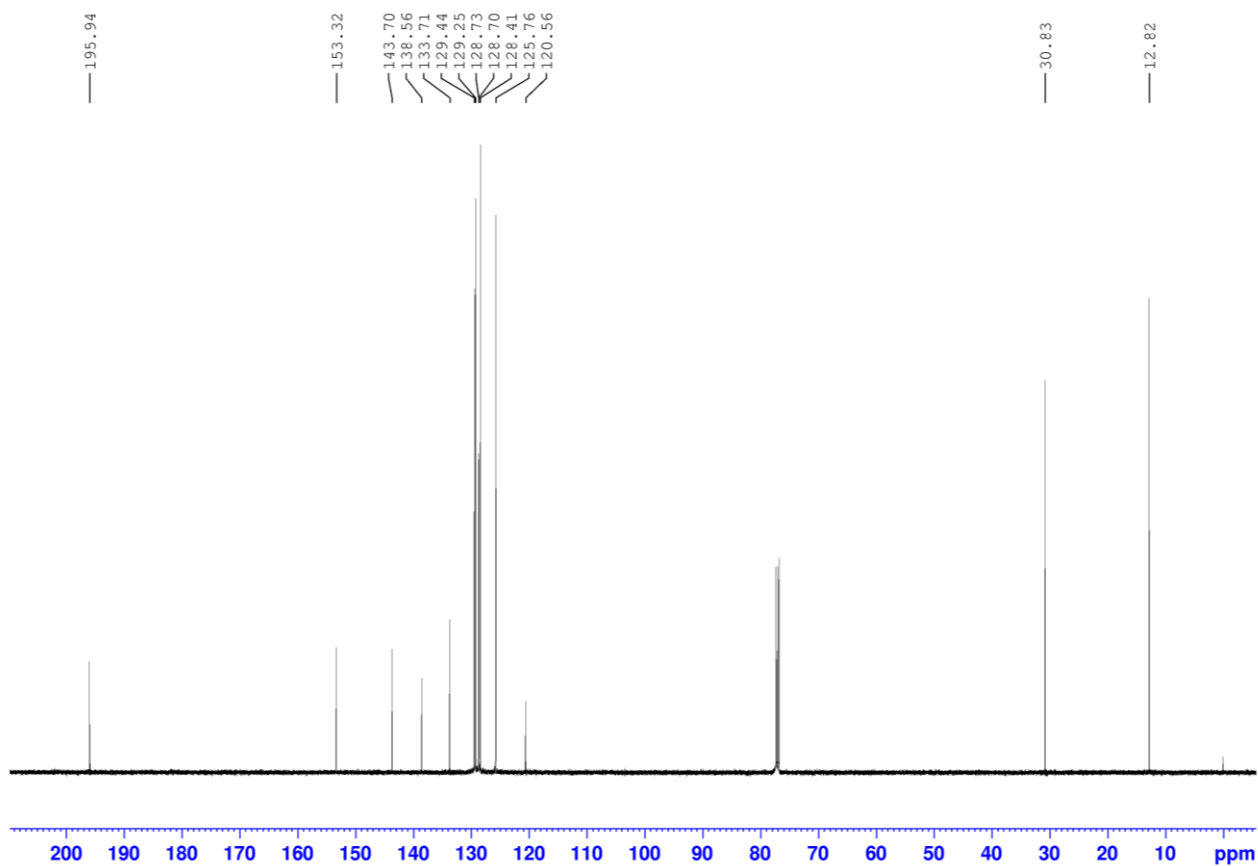

## COSY NMR

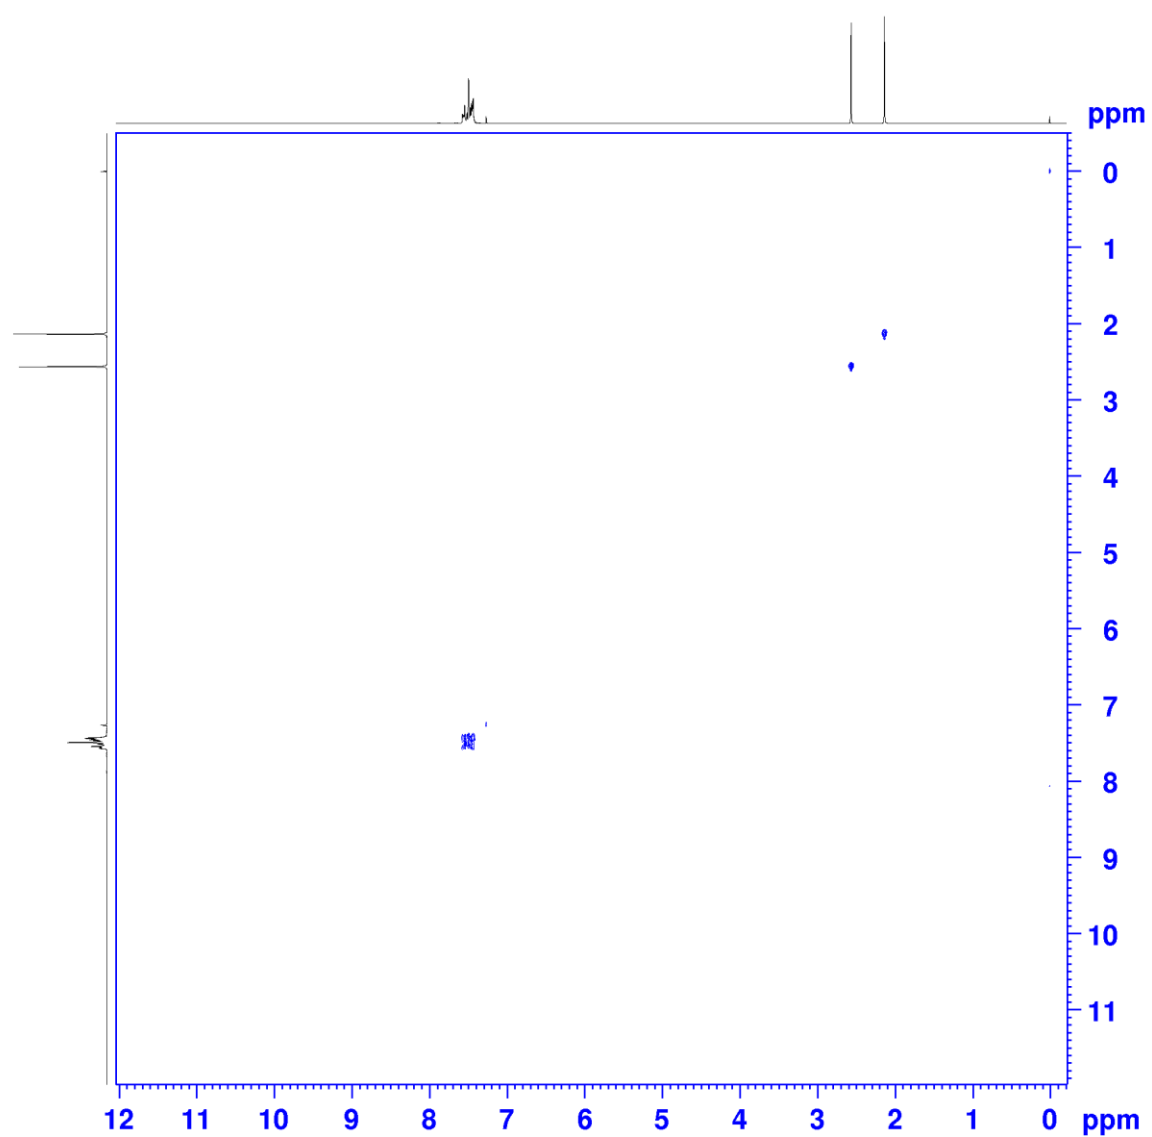

**HRMS**

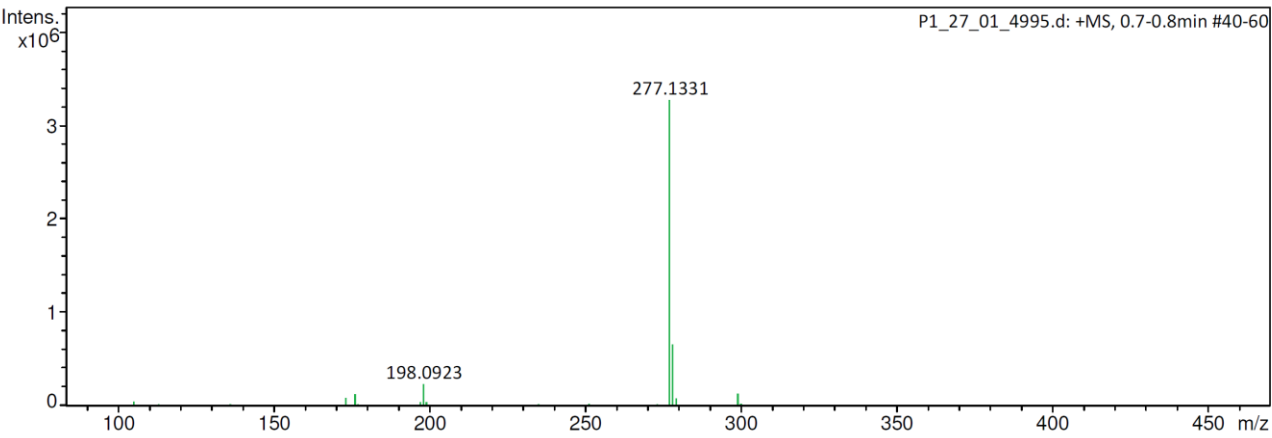

**1-(3-(4-Methoxyphenyl)-5-methyl-1-phenyl-1*H*-pyrazol-4-yl)ethanone (6b)**

**<sup>1</sup>H NMR**

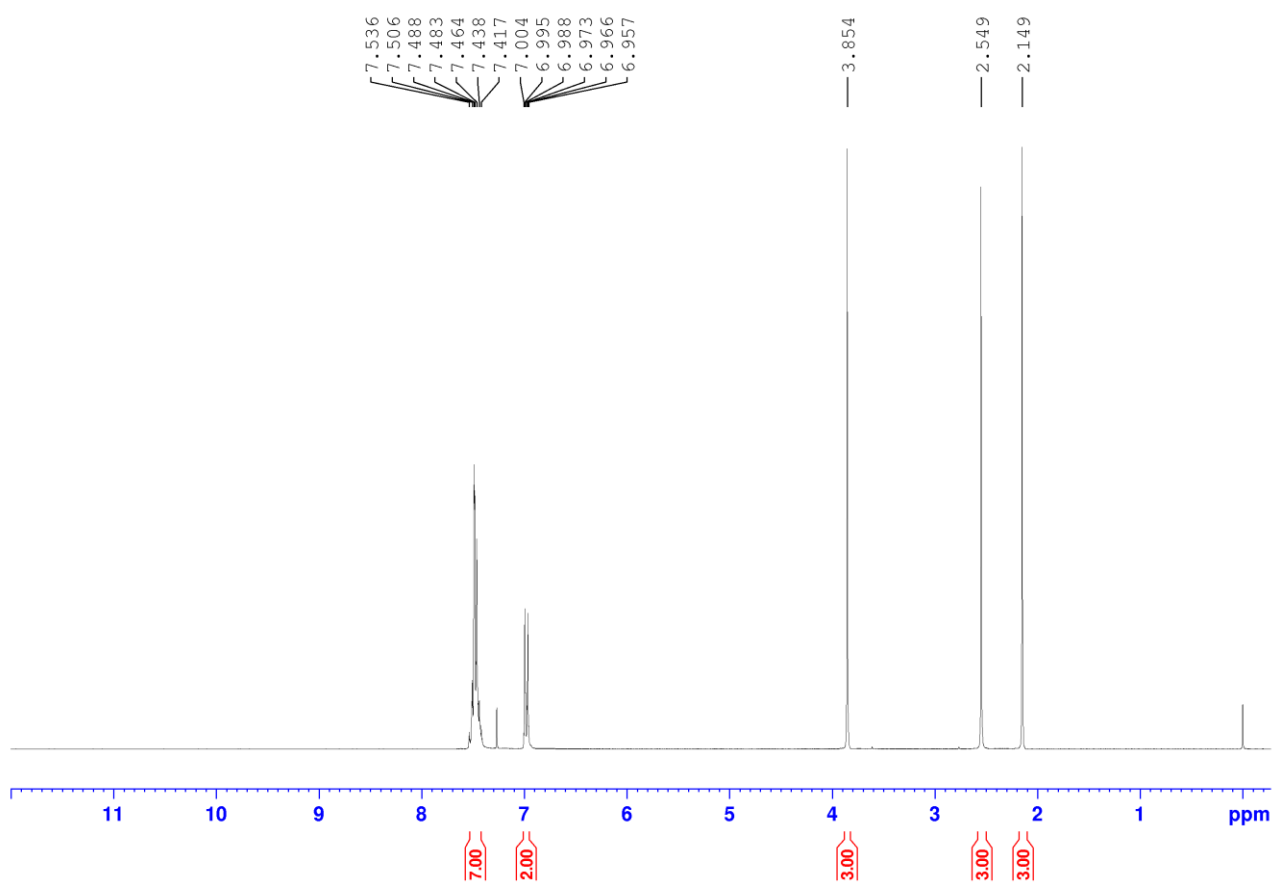

# $^{13}\text{C}$ NMR

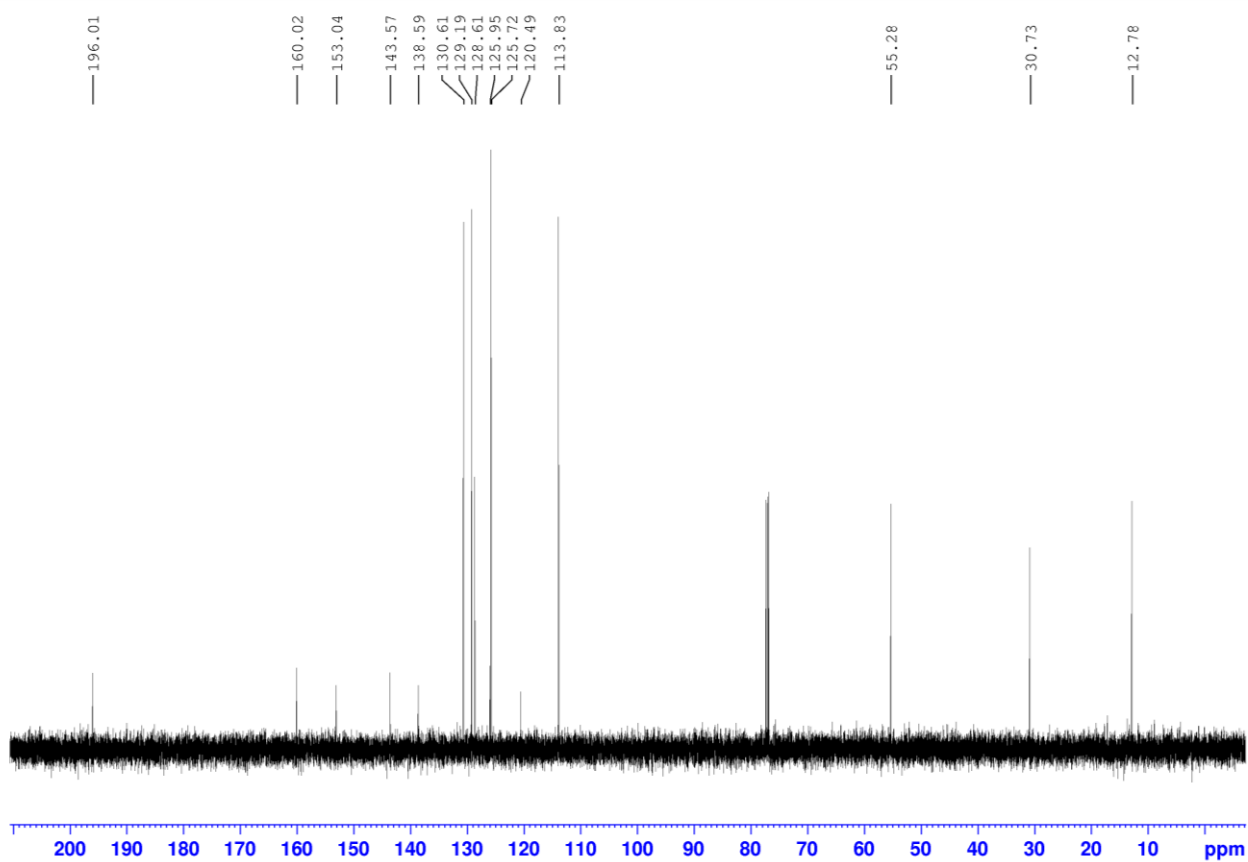



## COSY NMR

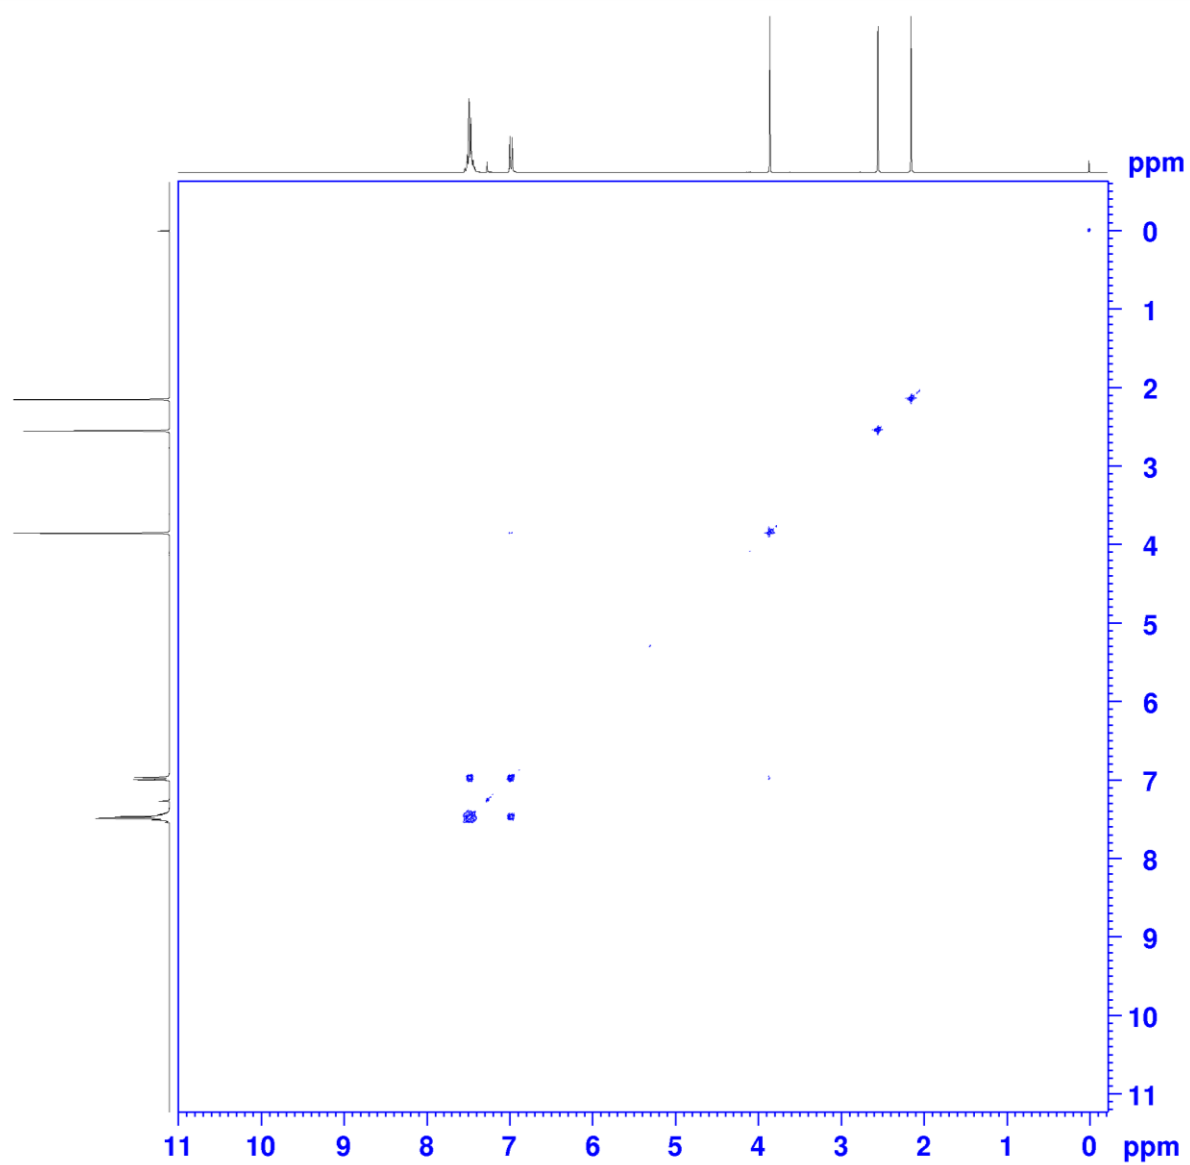

**HRMS**

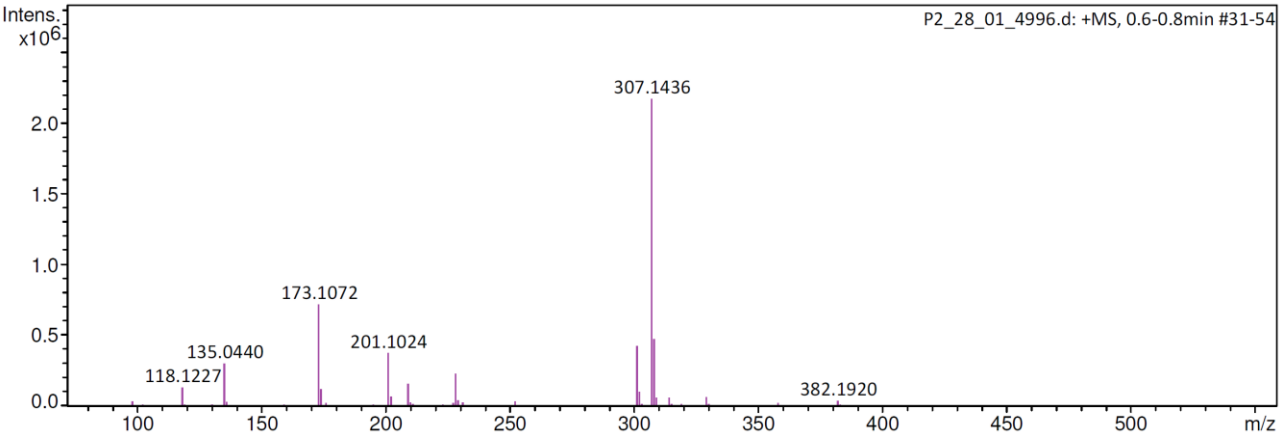

**1-(5-Methyl-1-phenyl-3-(*p*-tolyl)-1*H*-pyrazol-4-yl)ethanone (6c)**

**<sup>1</sup>H NMR**

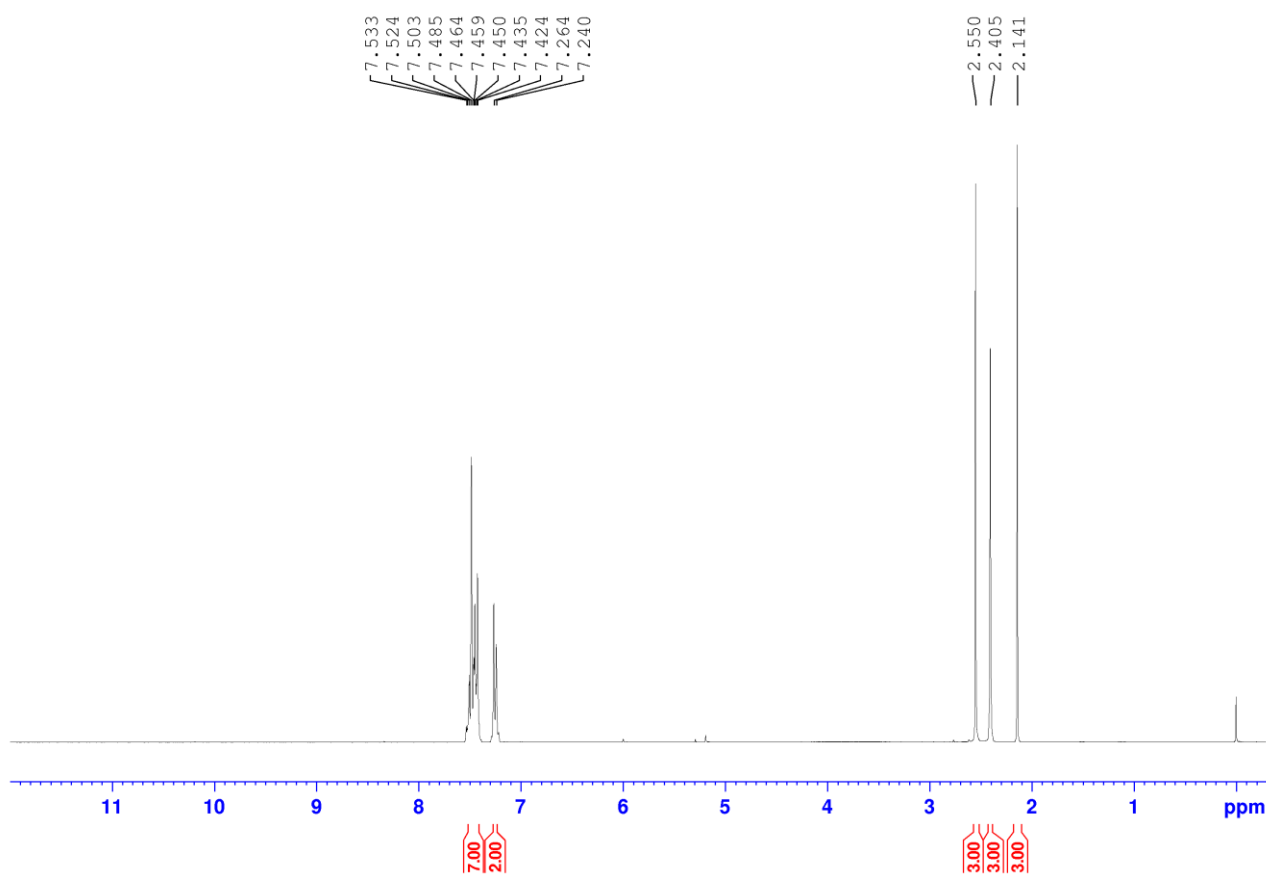

# $^{13}\text{C}$ NMR

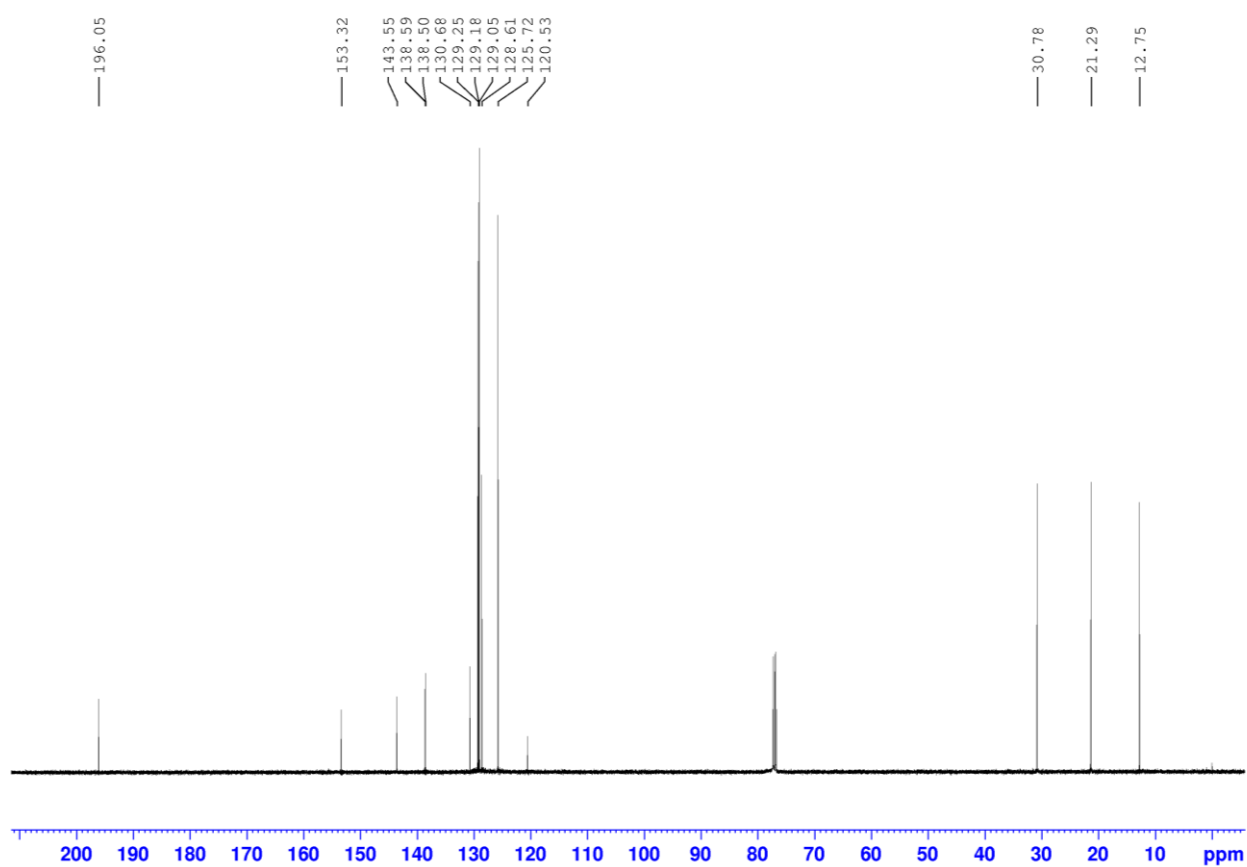

## COSY NMR

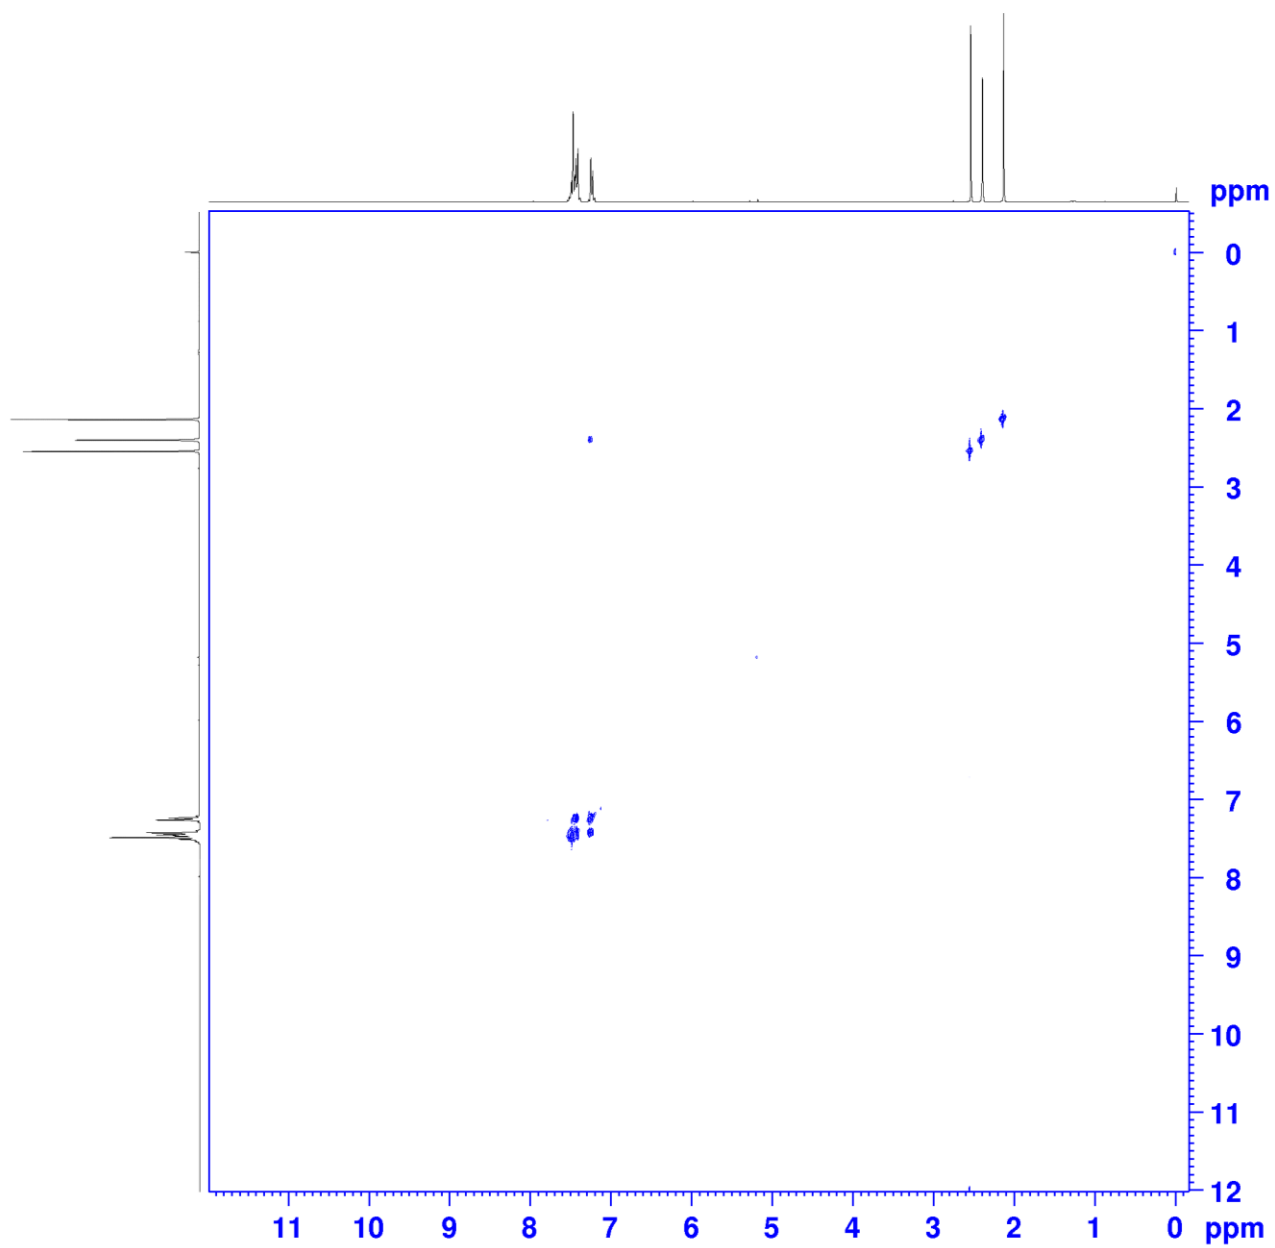

**HRMS**

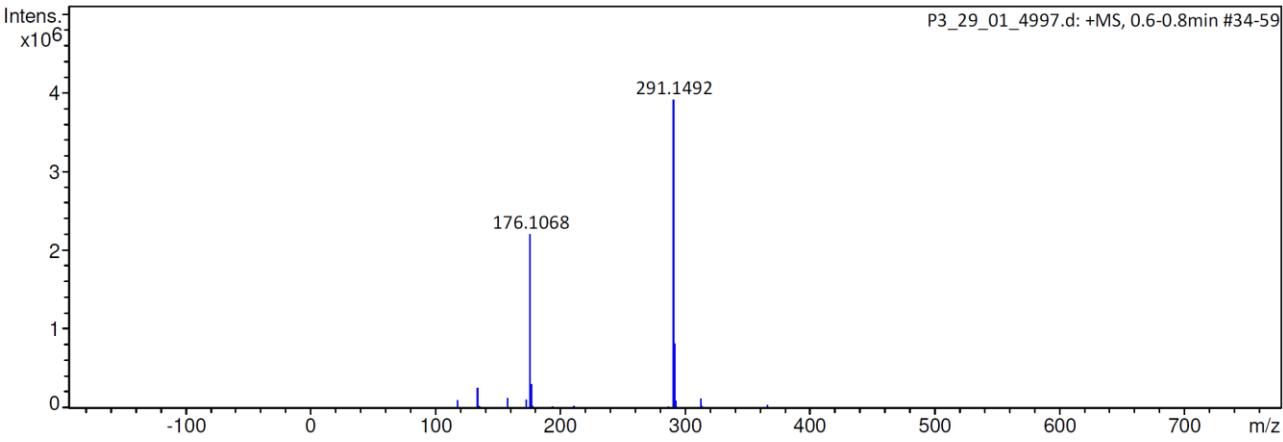

**1-(5-Methyl-3-(4-nitrophenyl)-1-phenyl-1H-pyrazol-4-yl)ethanone (6d)**

**<sup>1</sup>H NMR**

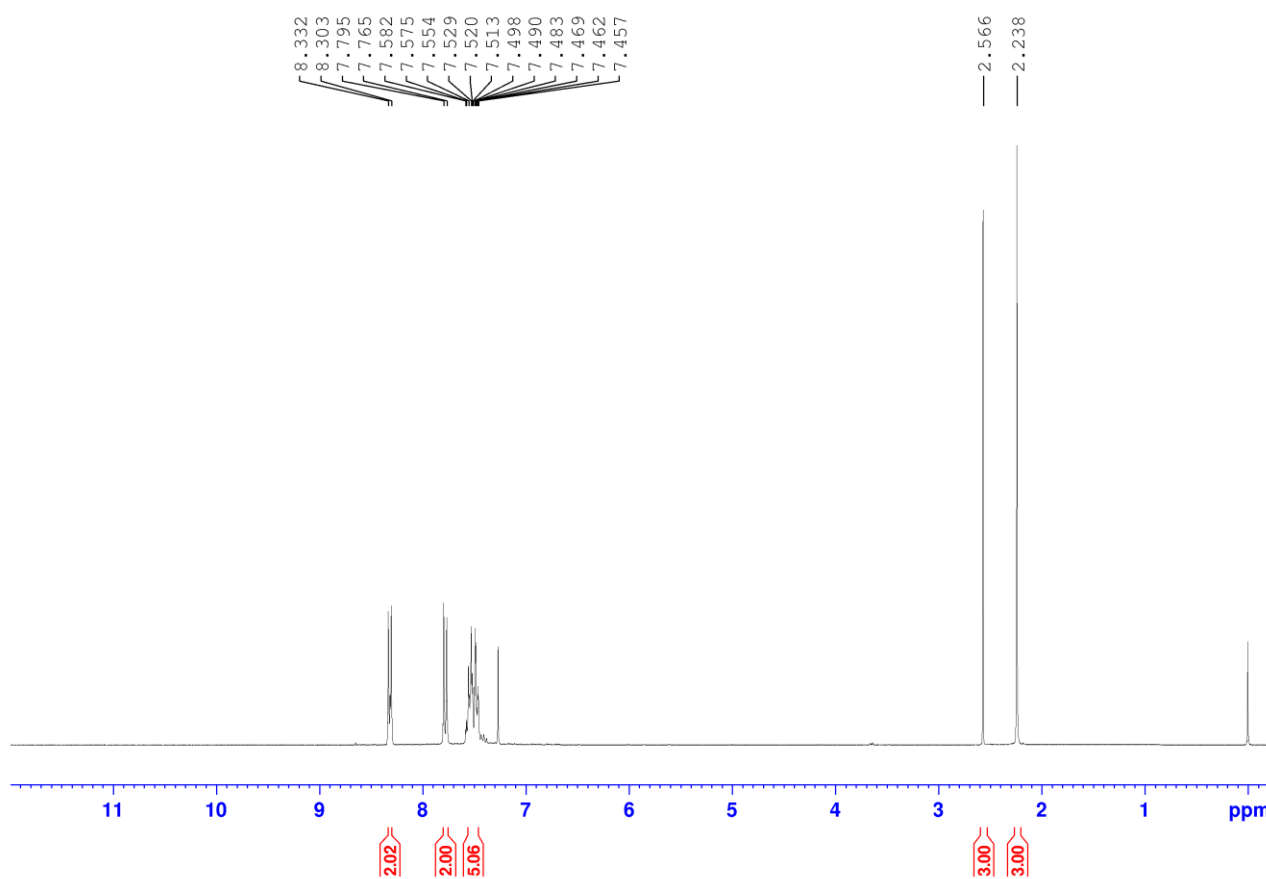

# $^{13}\text{C}$ NMR

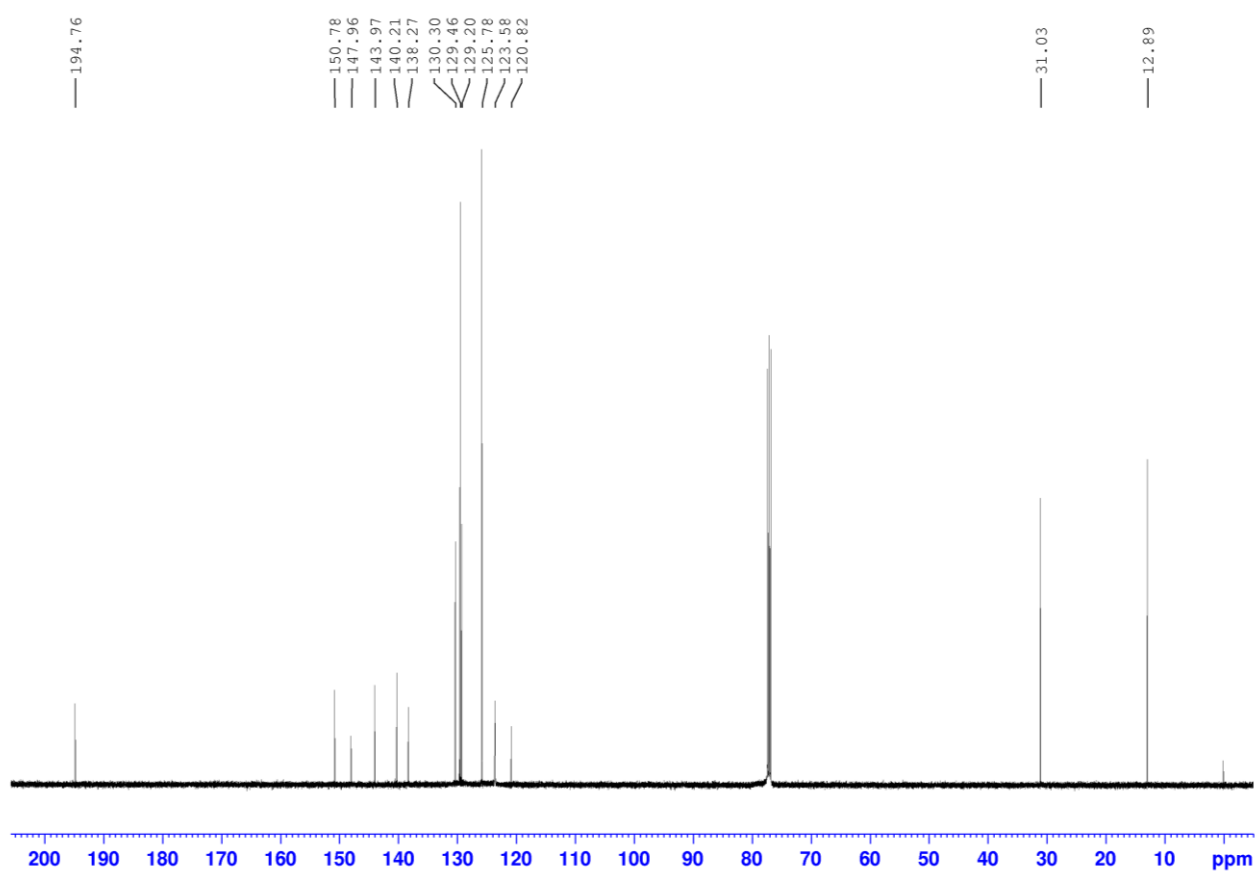



## COSY NMR

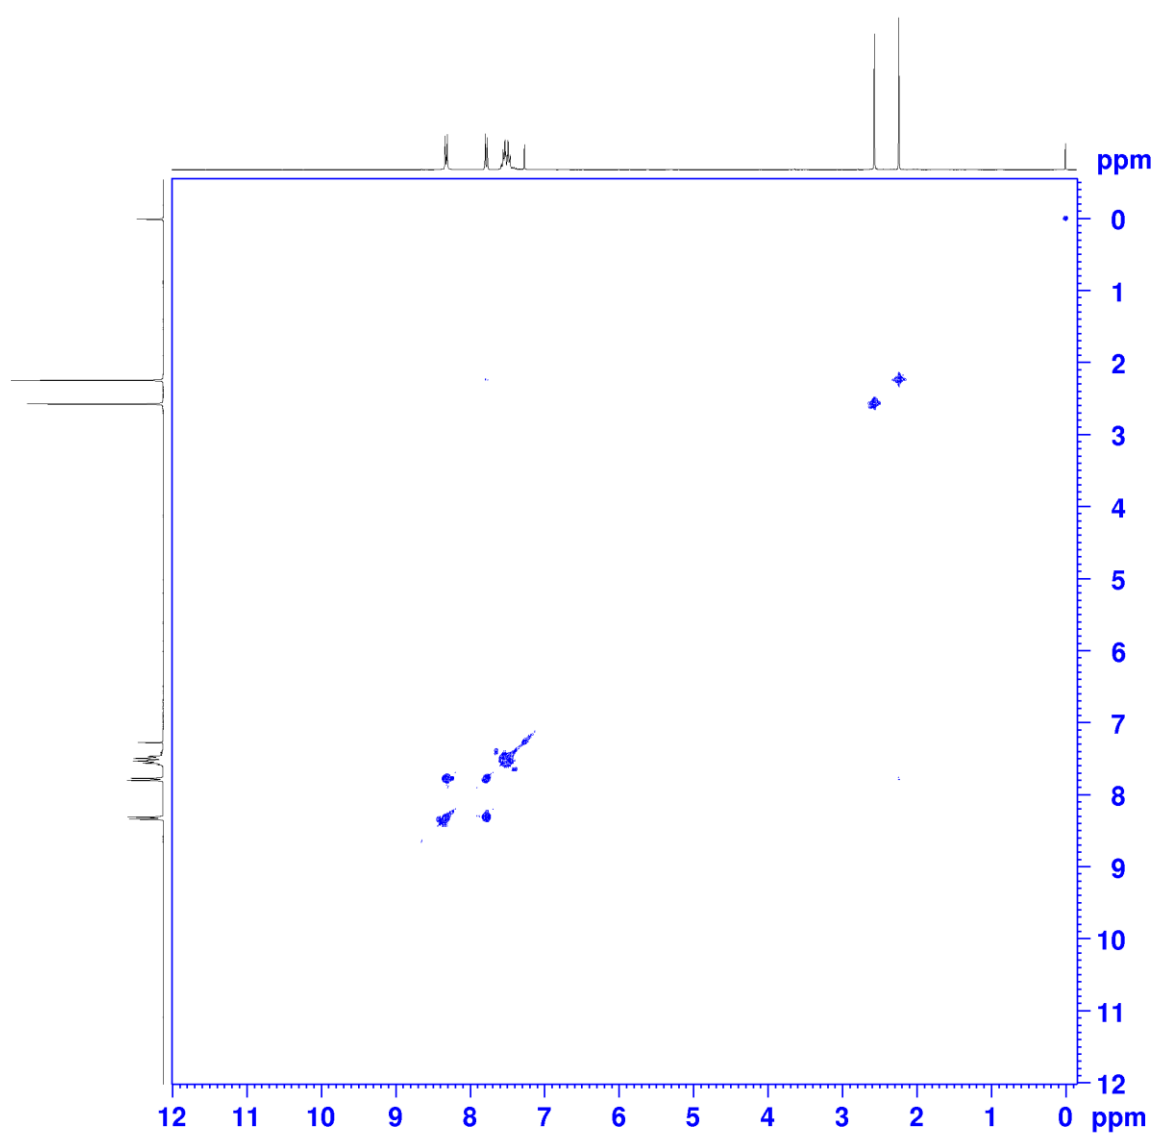

**HRMS**

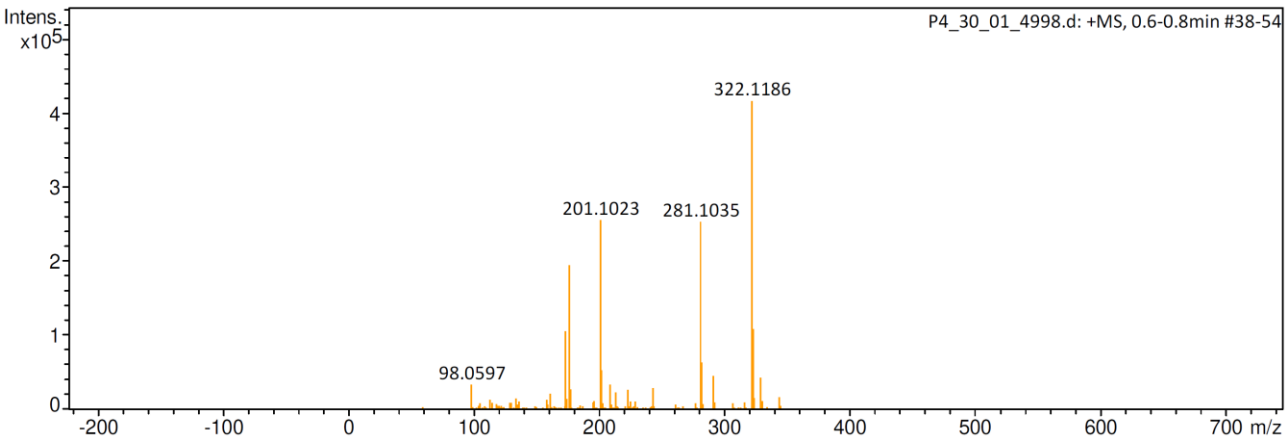

**1-(3-(2-Chlorophenyl)-5-methyl-1-phenyl-1*H*-pyrazol-4-yl)ethanone (6e)**

**<sup>1</sup>H NMR**

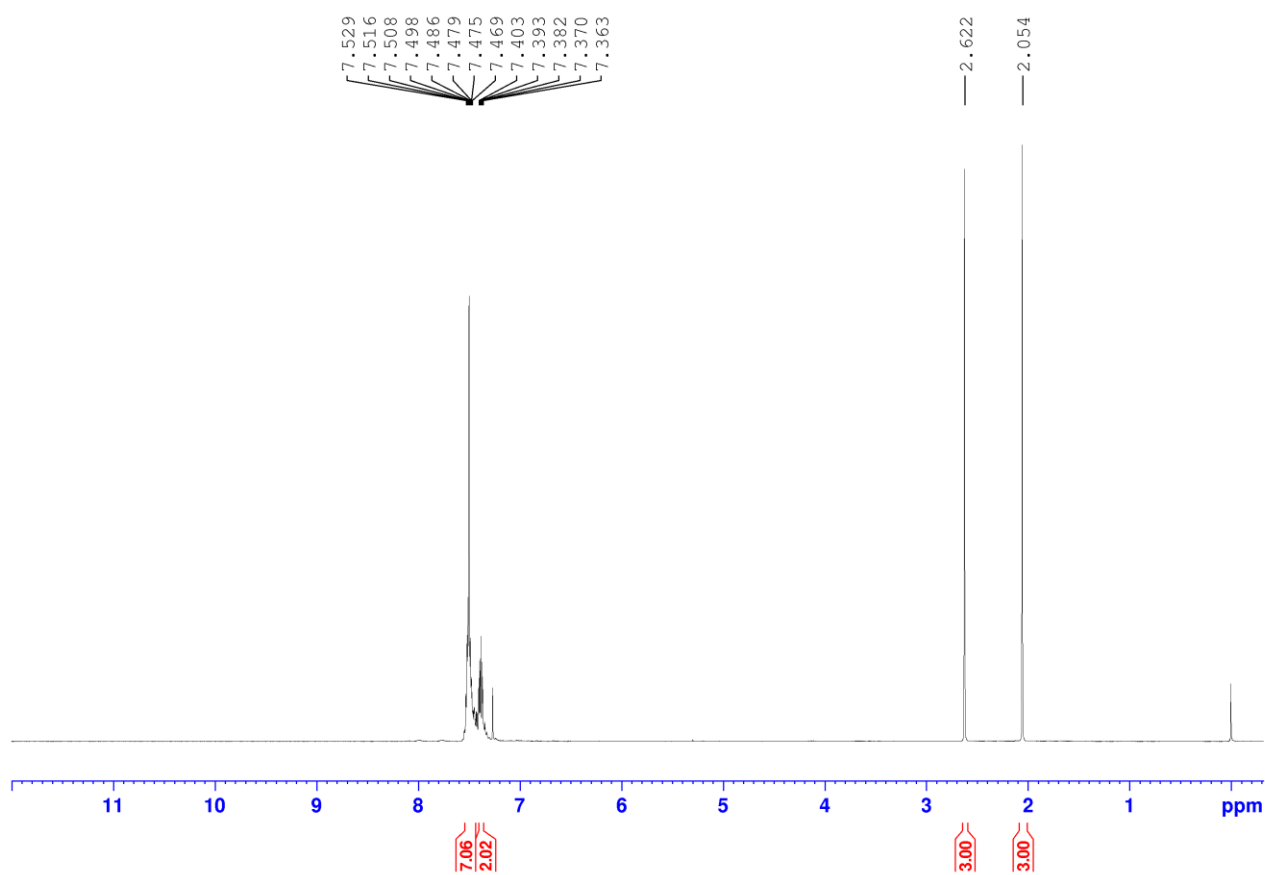

# $^{13}\text{C}$ NMR

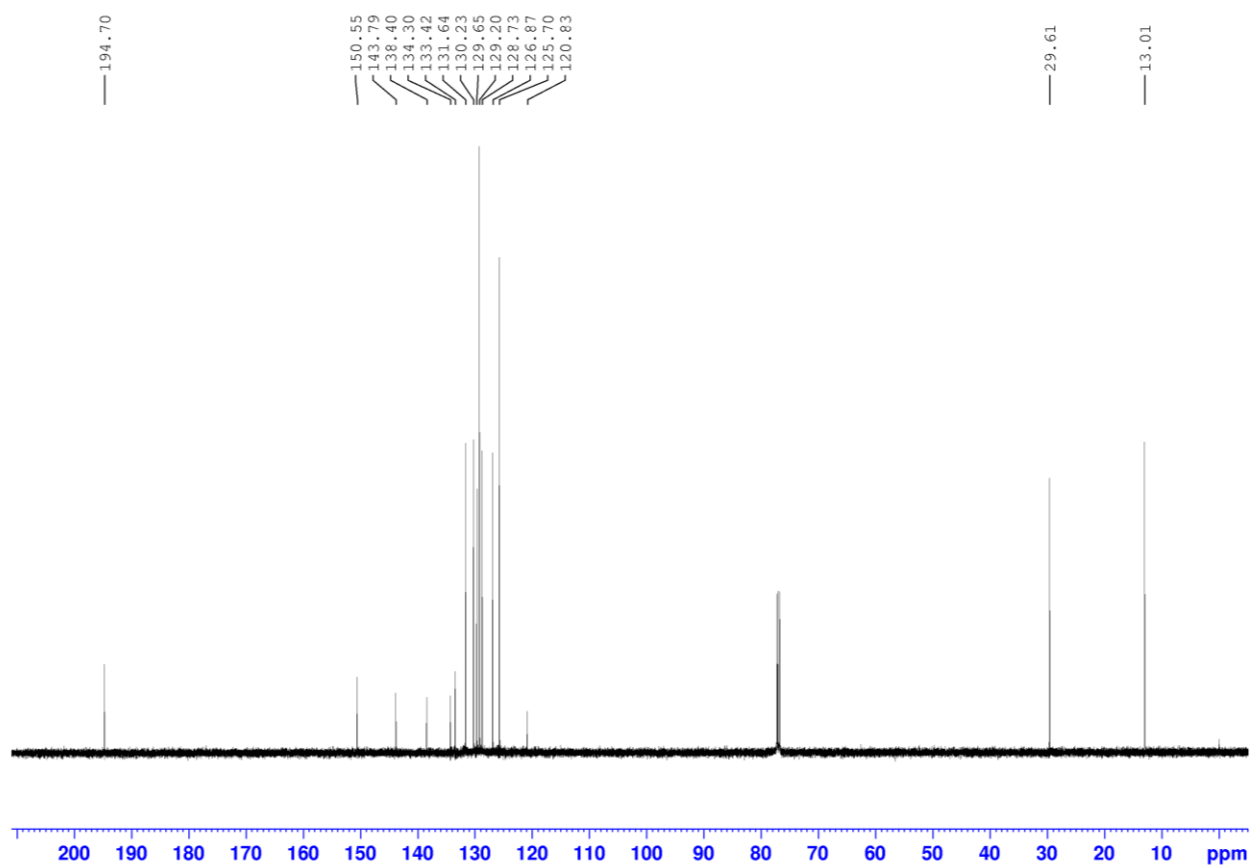

## COSY NMR

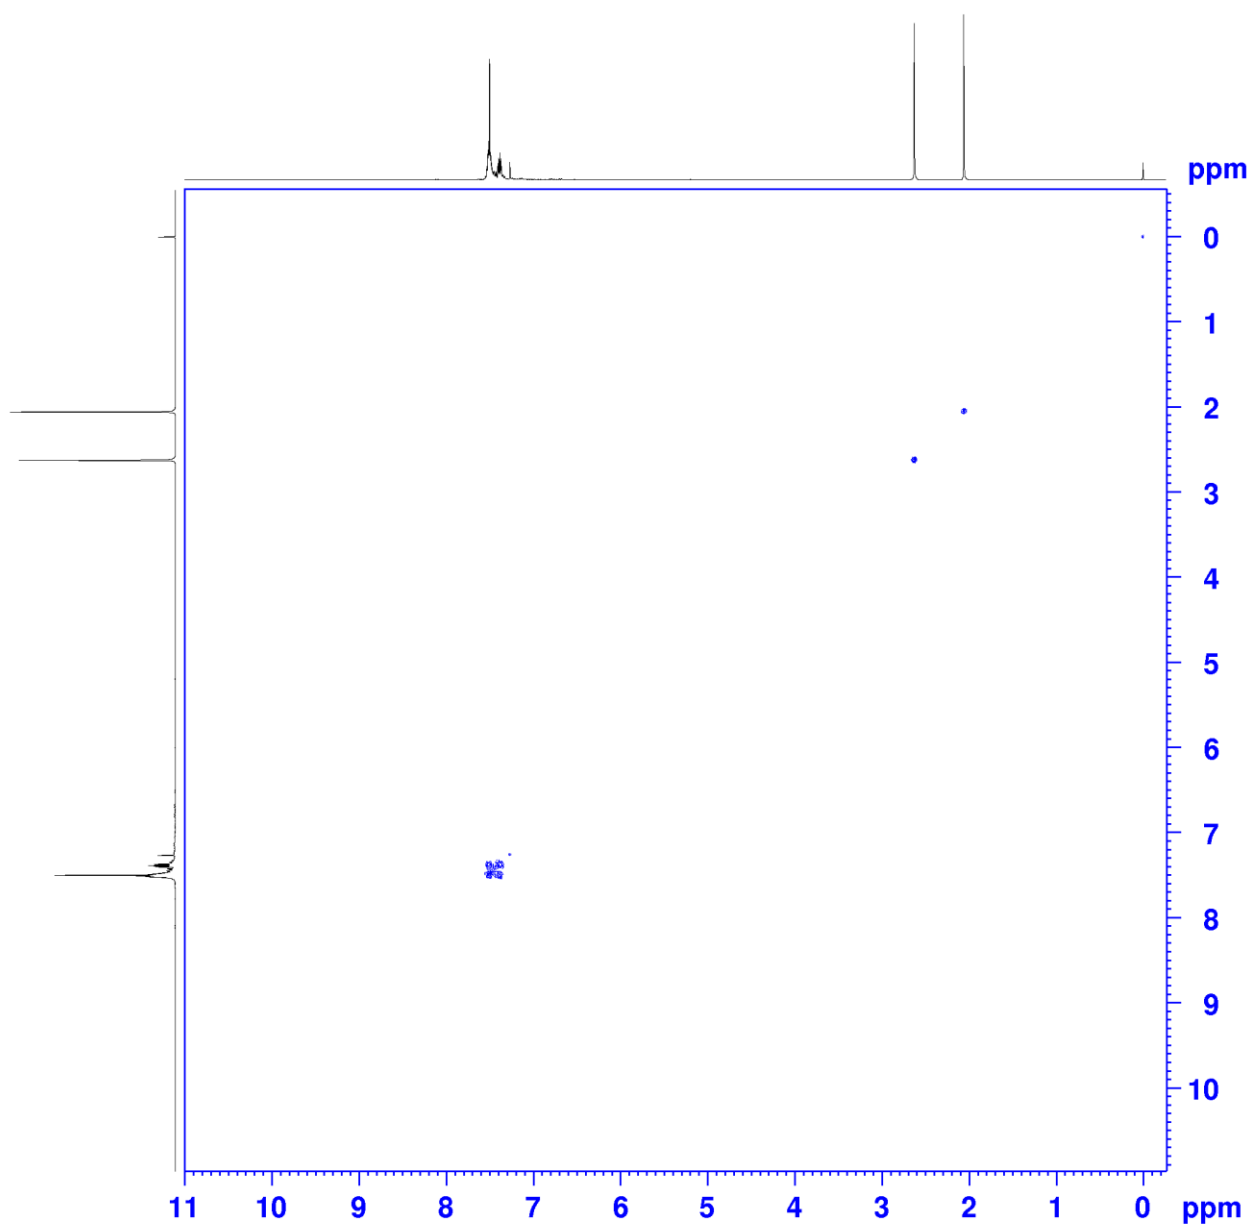

**HRMS**

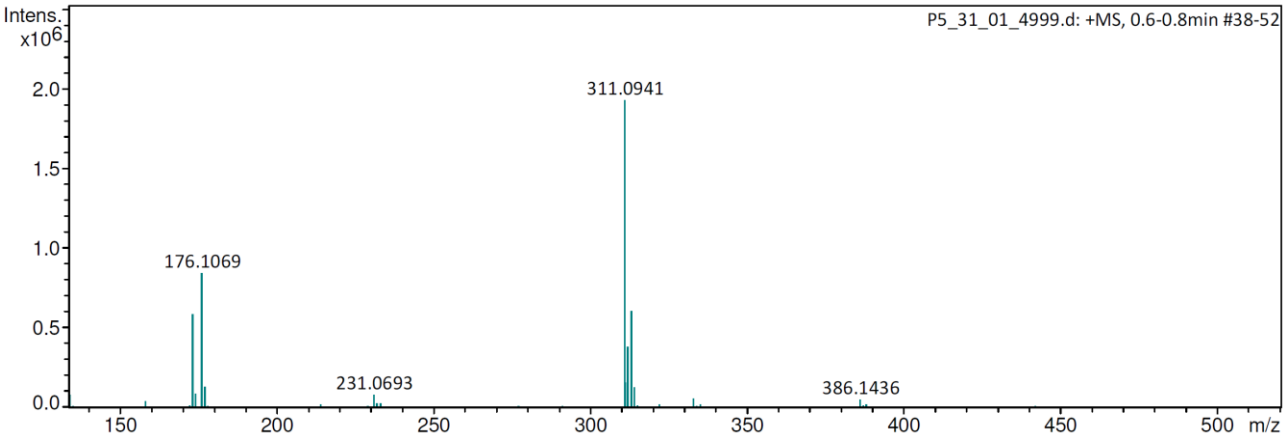

**1-(3-(3-Chlorophenyl)-5-methyl-1-phenyl-1*H*-pyrazol-4-yl)ethanone (6f)**

**<sup>1</sup>H NMR**

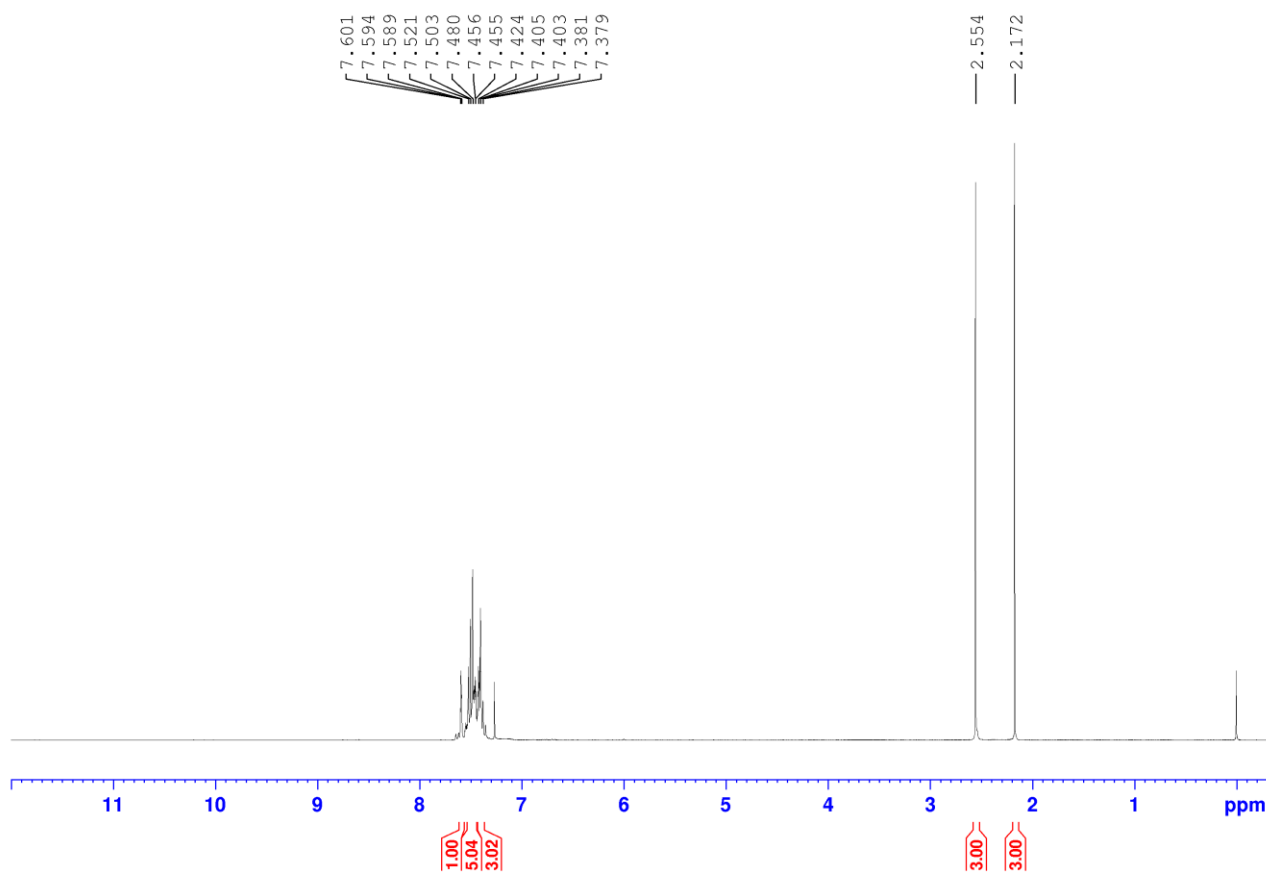

# $^{13}\text{C}$ NMR

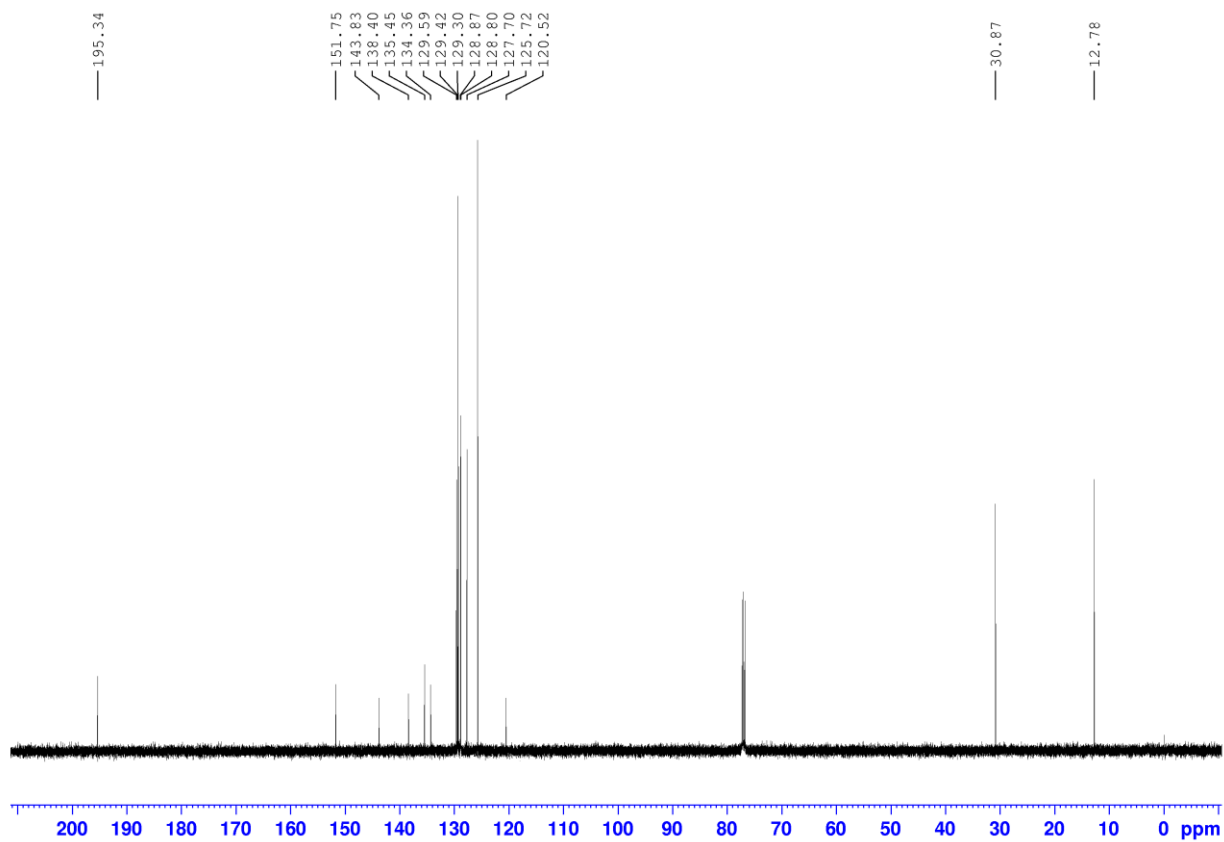



## COSY NMR

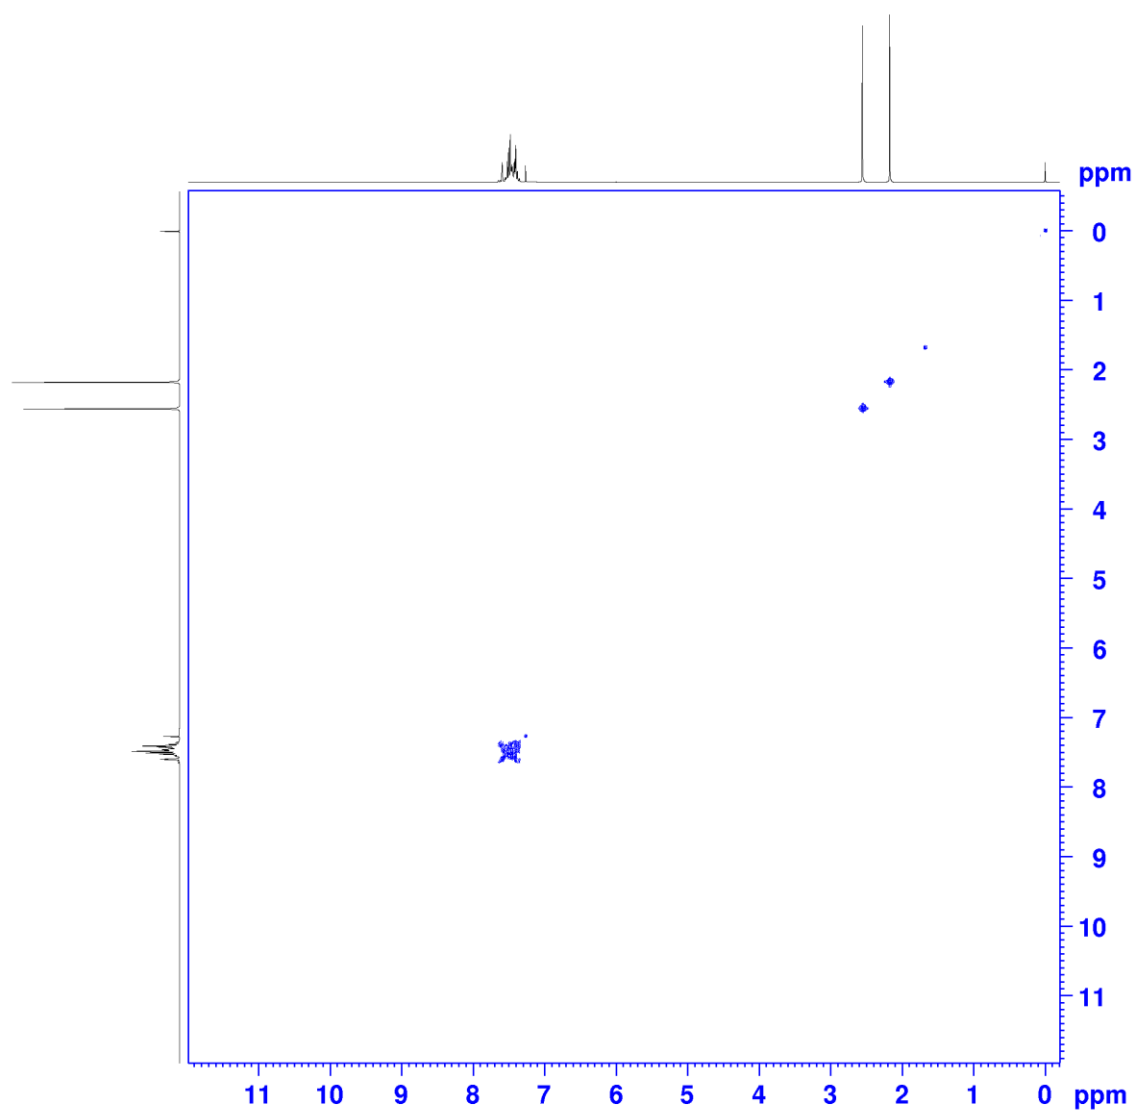

**HRMS**

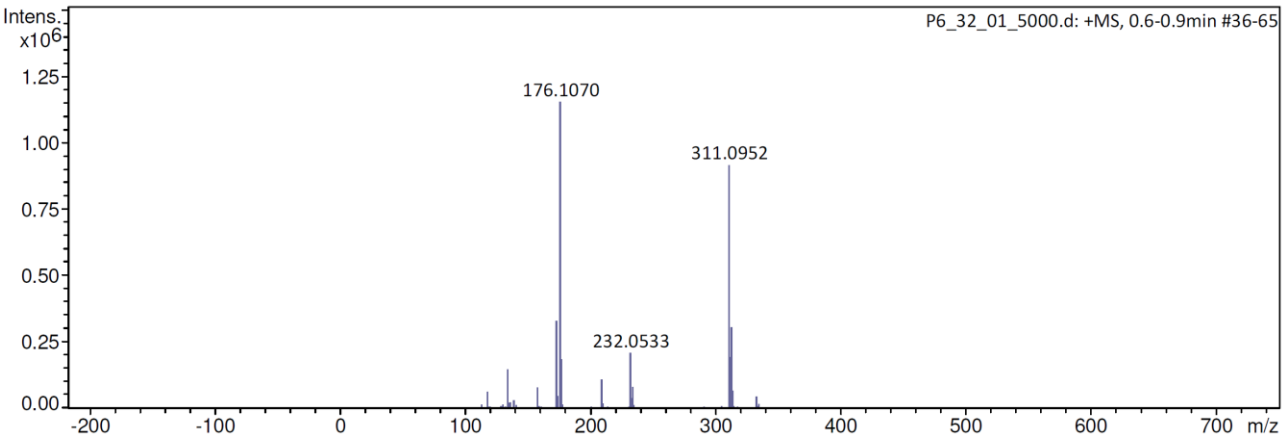

**1-(3-(4-Chlorophenyl)-5-methyl-1-phenyl-1*H*-pyrazol-4-yl)ethanone (6g)**

**<sup>1</sup>H NMR**

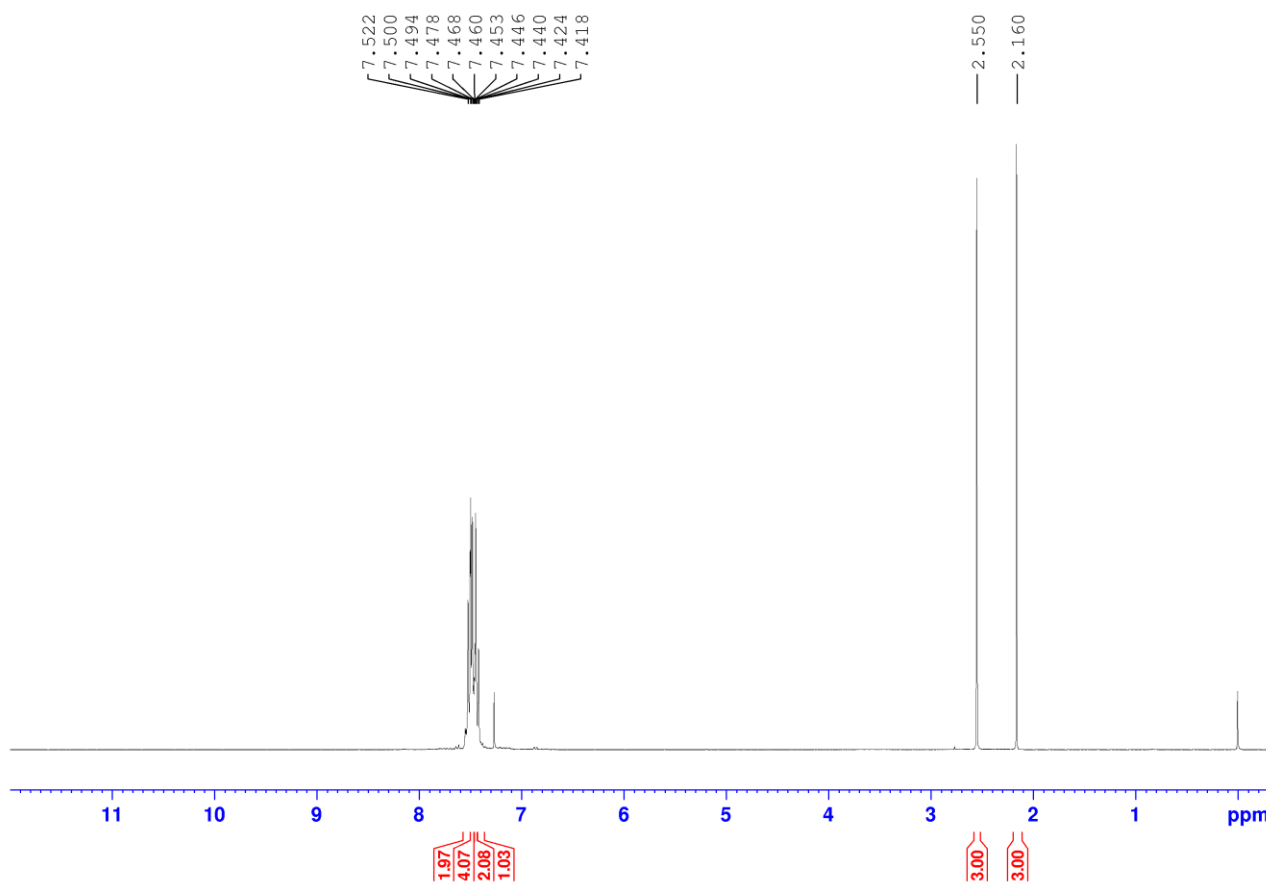

# <sup>13</sup>C NMR

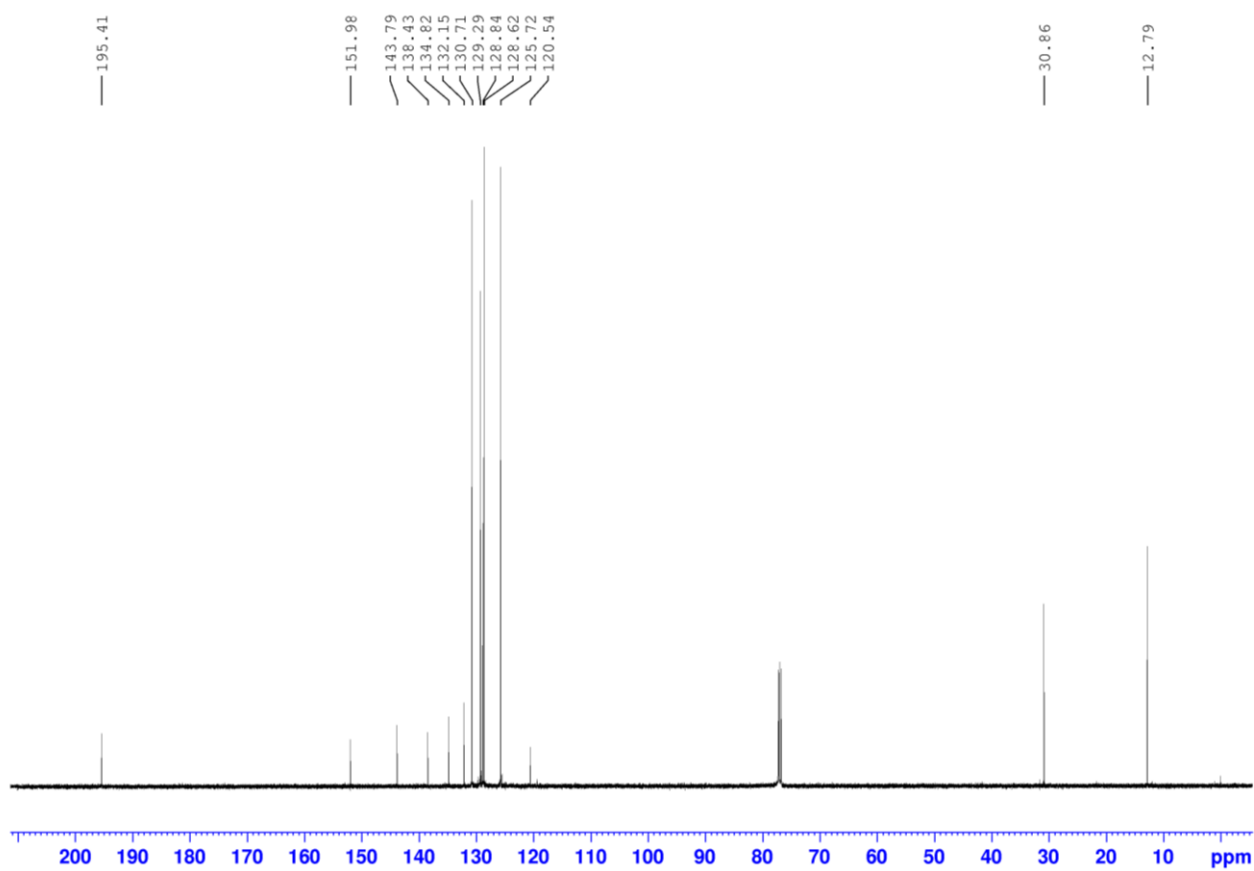

## COSY NMR

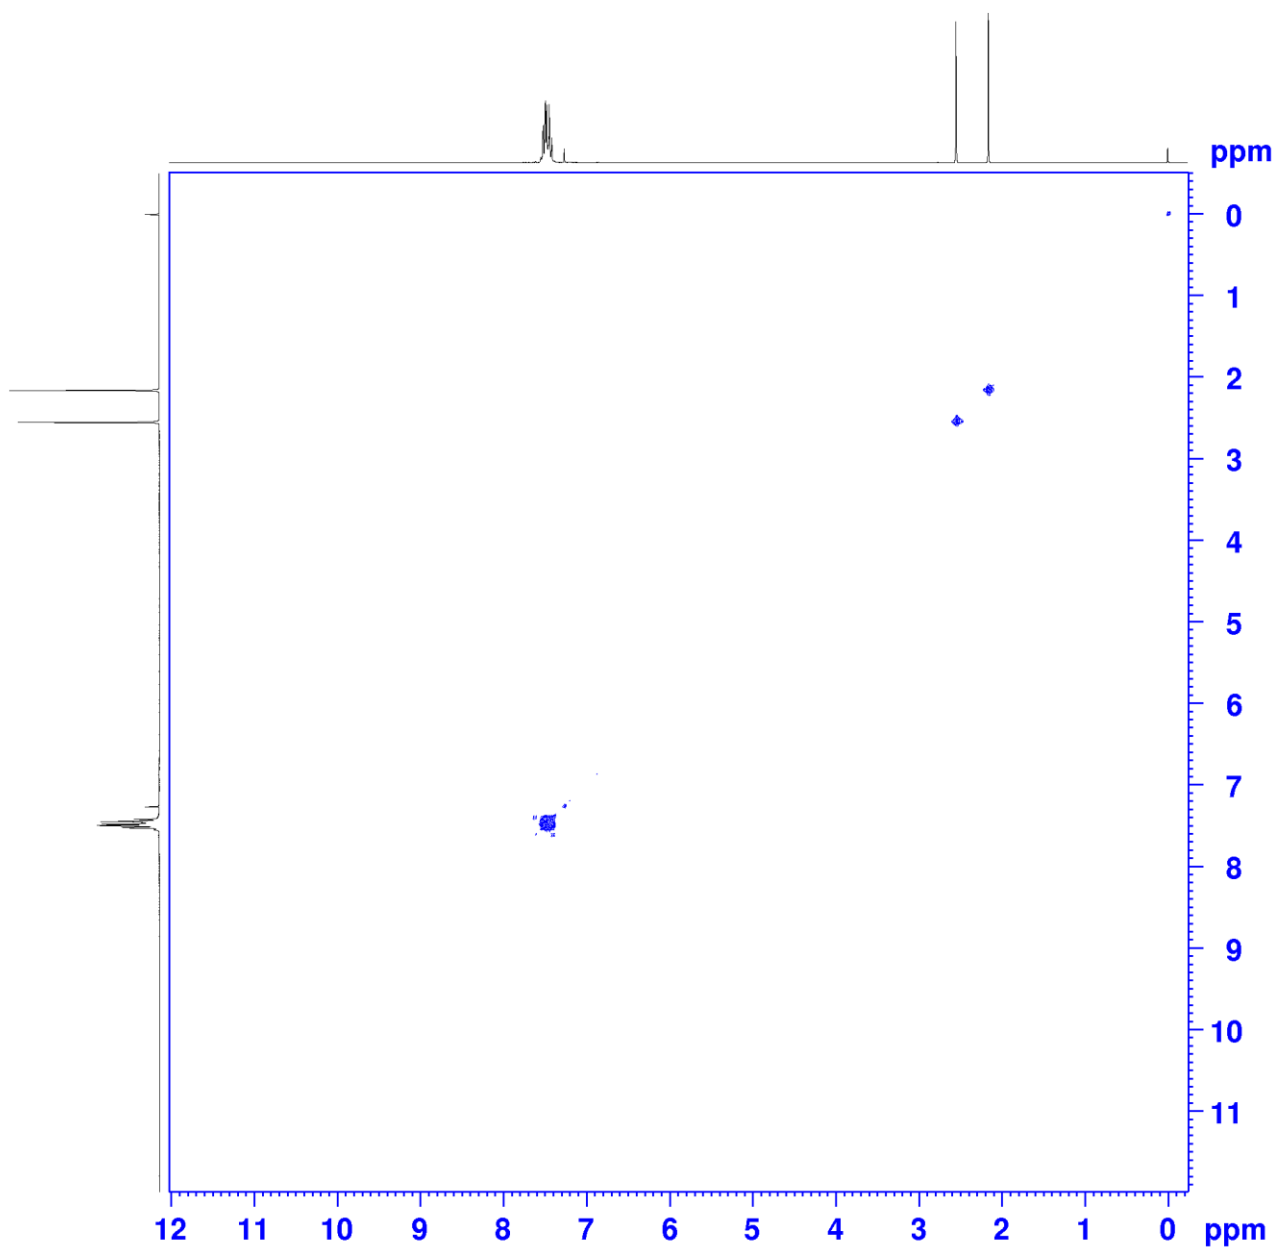

HRMS

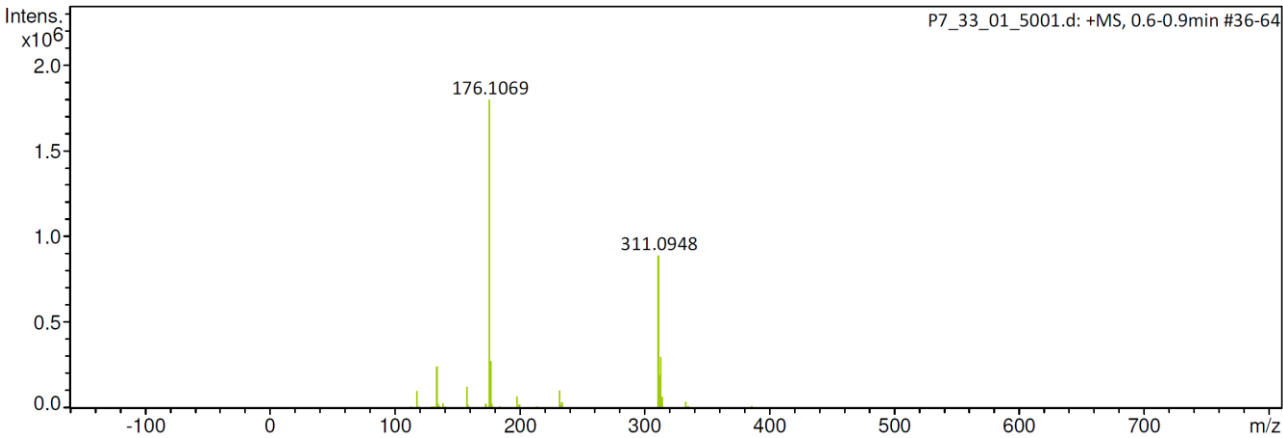

**(5-Methyl-1,3-diphenyl-1*H*-pyrazol-4-yl)(phenyl)methanone (6h)**

**<sup>1</sup>H NMR**

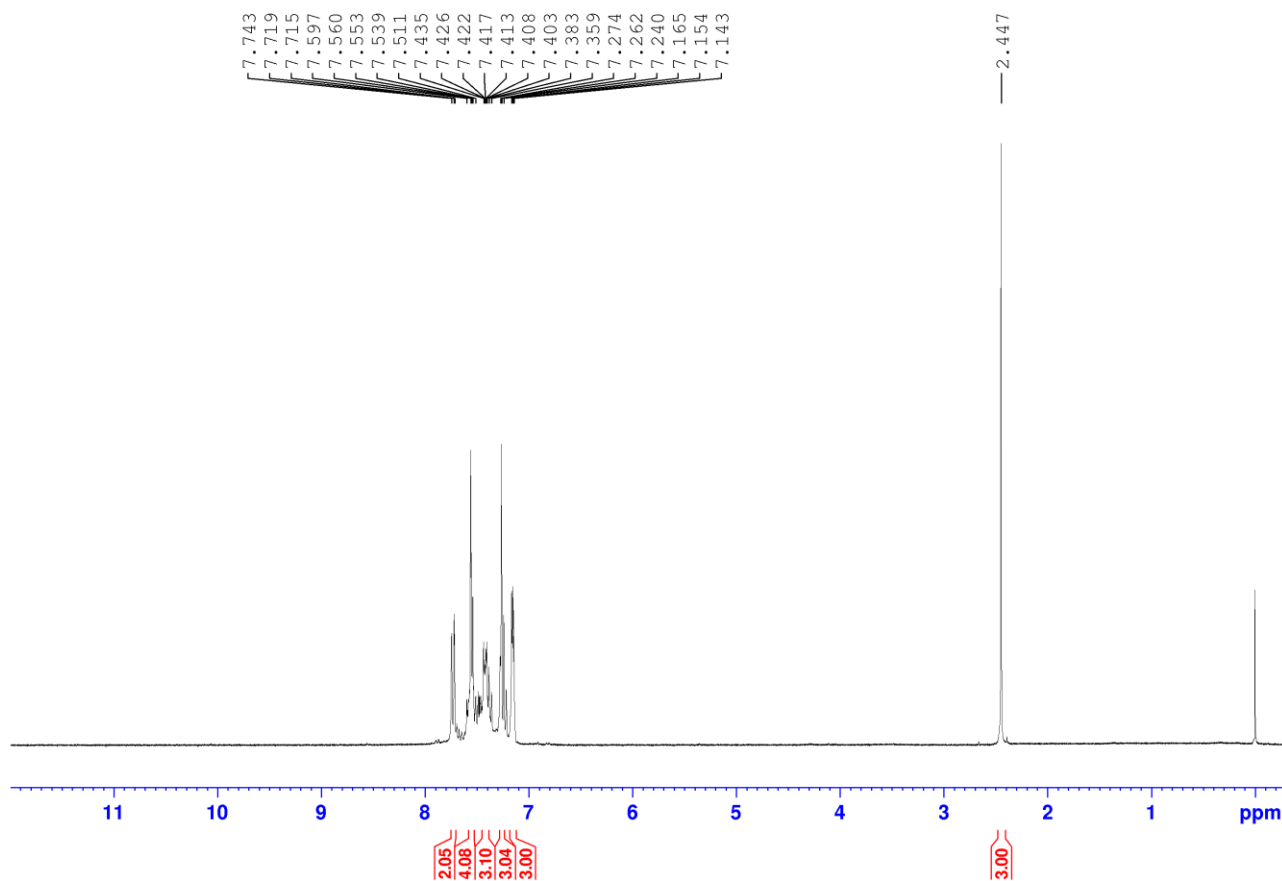

# <sup>13</sup>C NMR

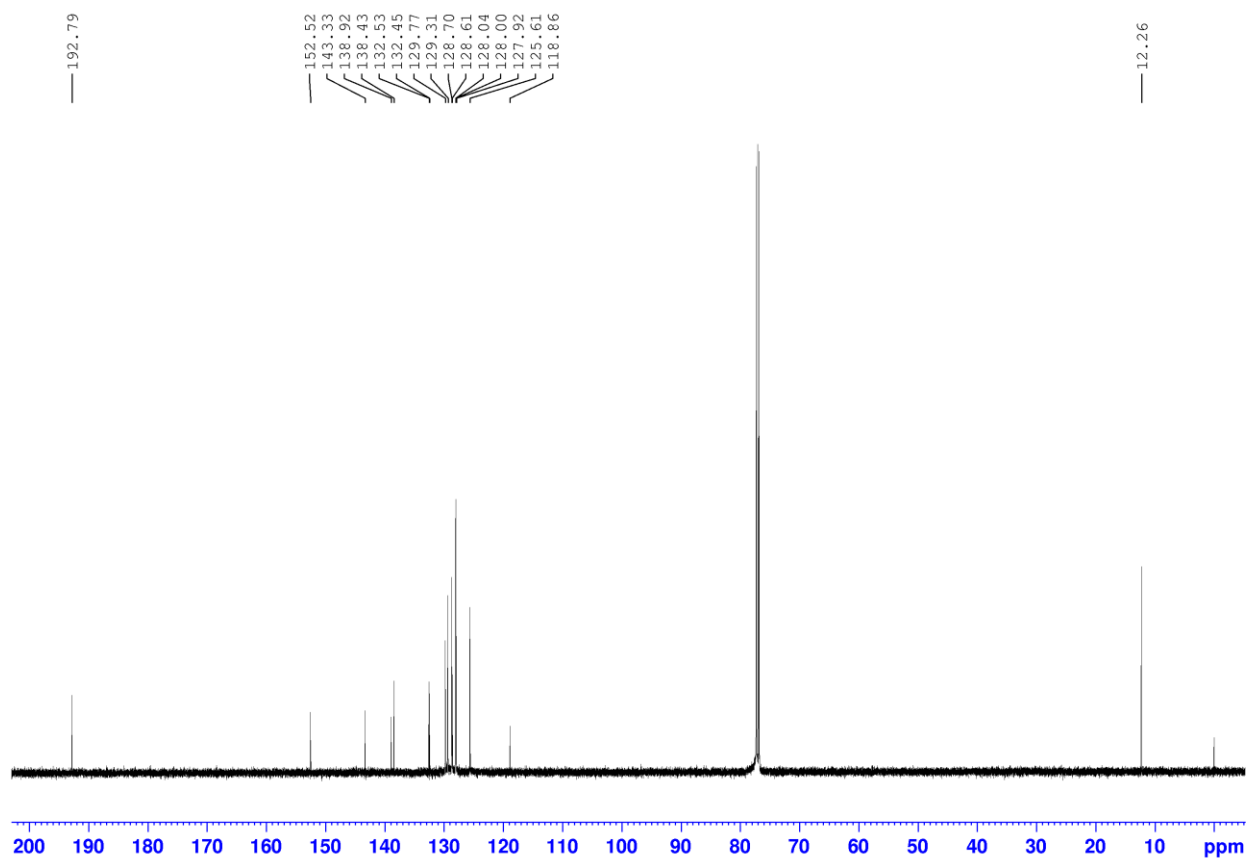



## COSY NMR

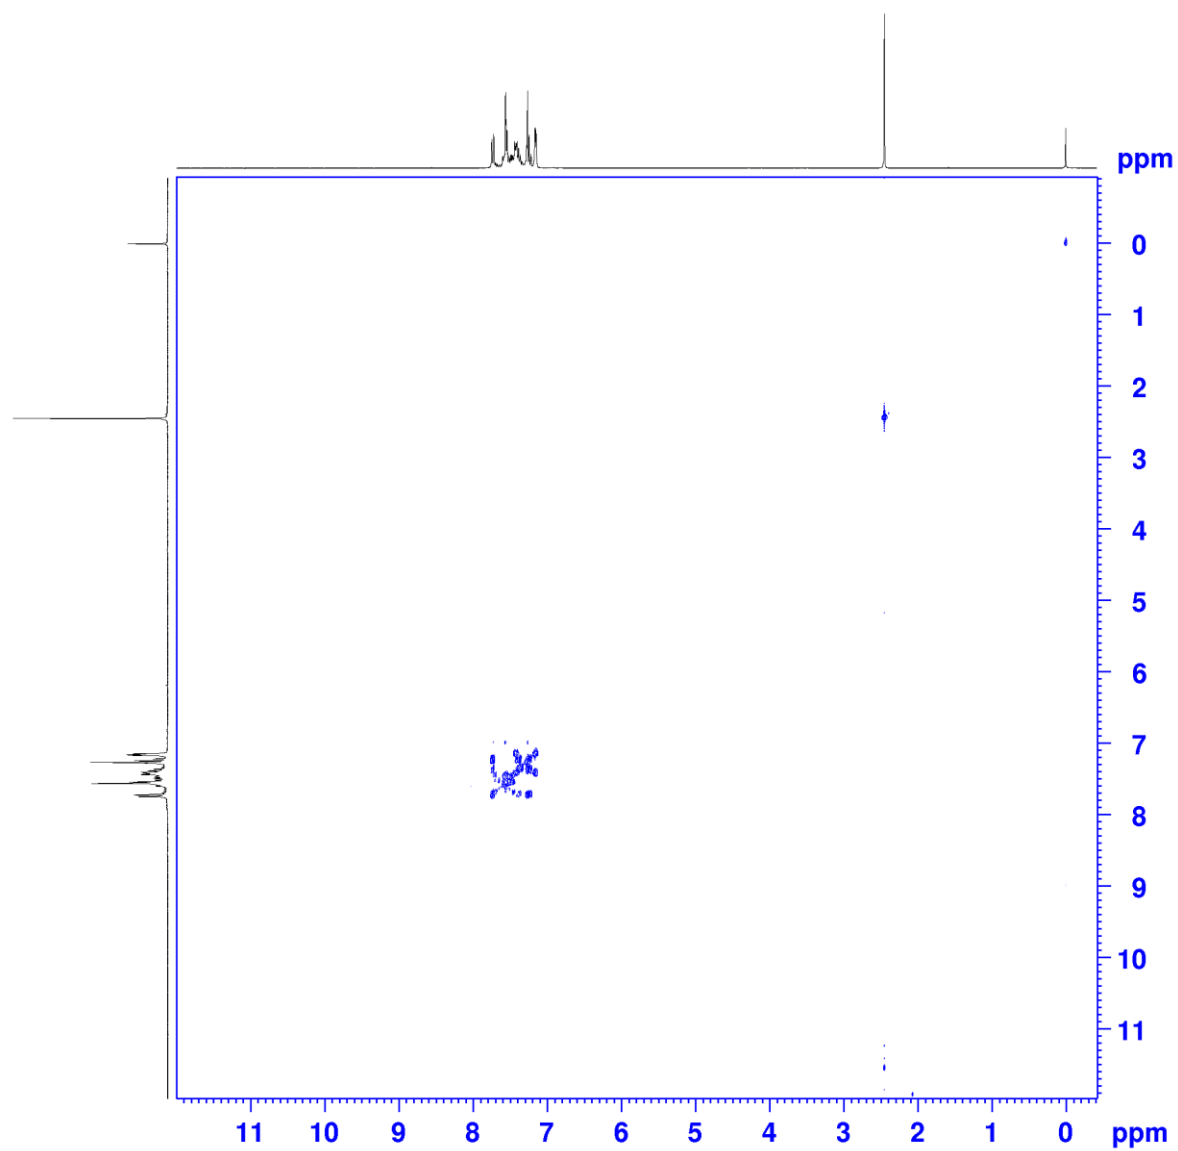

# HRMS

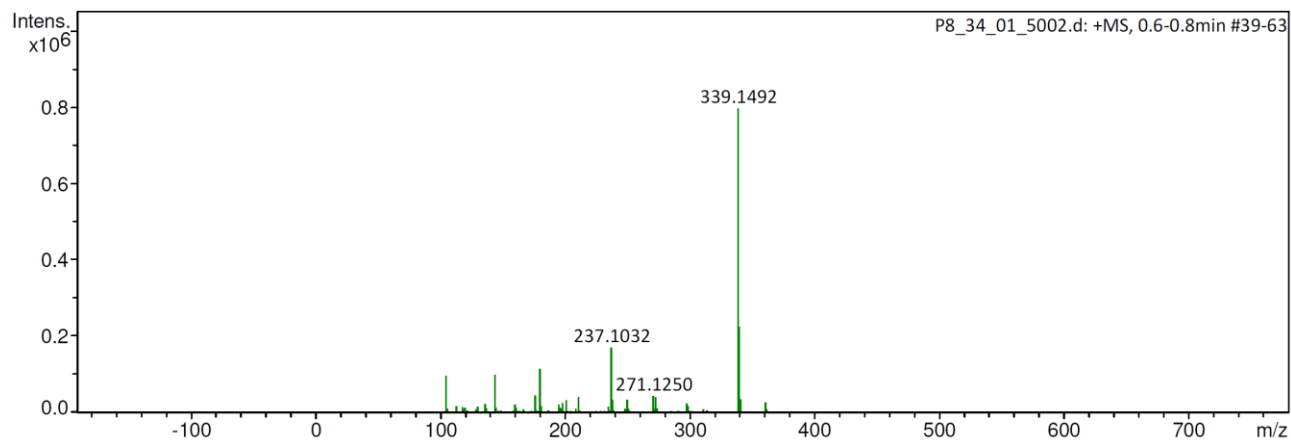

**(3-(4-Methoxyphenyl)-5-methyl-1-phenyl-1*H*-pyrazol-4-yl)(phenyl)methanone**  
**(6i)**

**<sup>1</sup>H NMR**

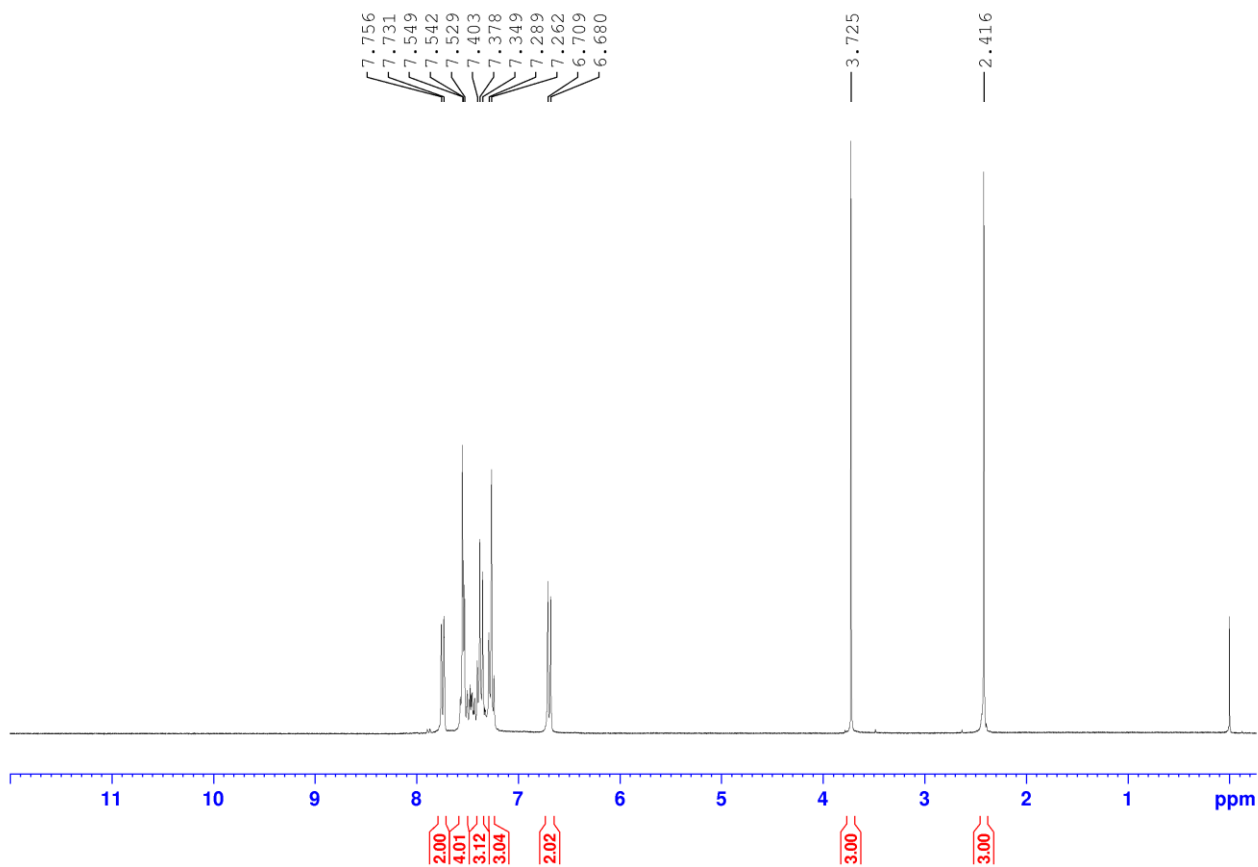

# $^{13}\text{C}$ NMR

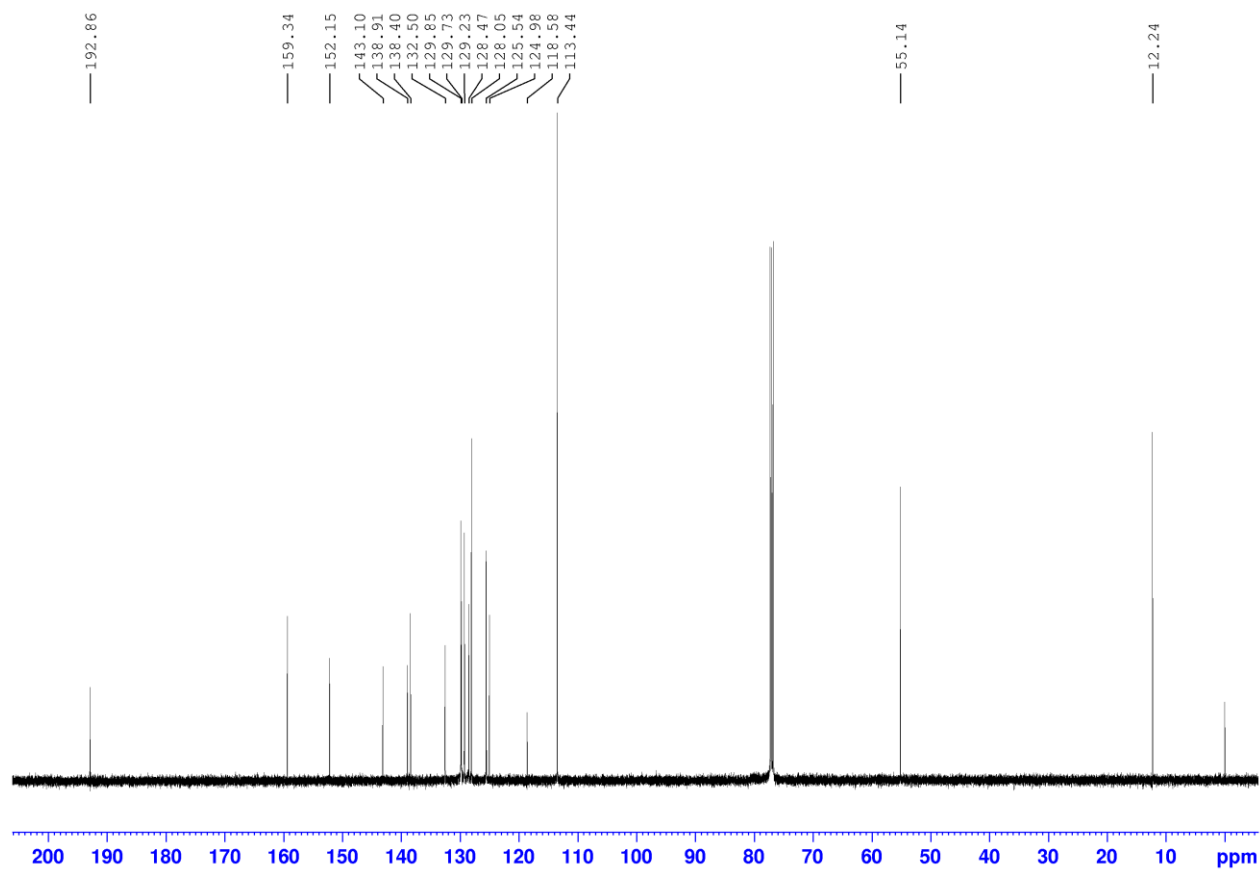

## COSY NMR

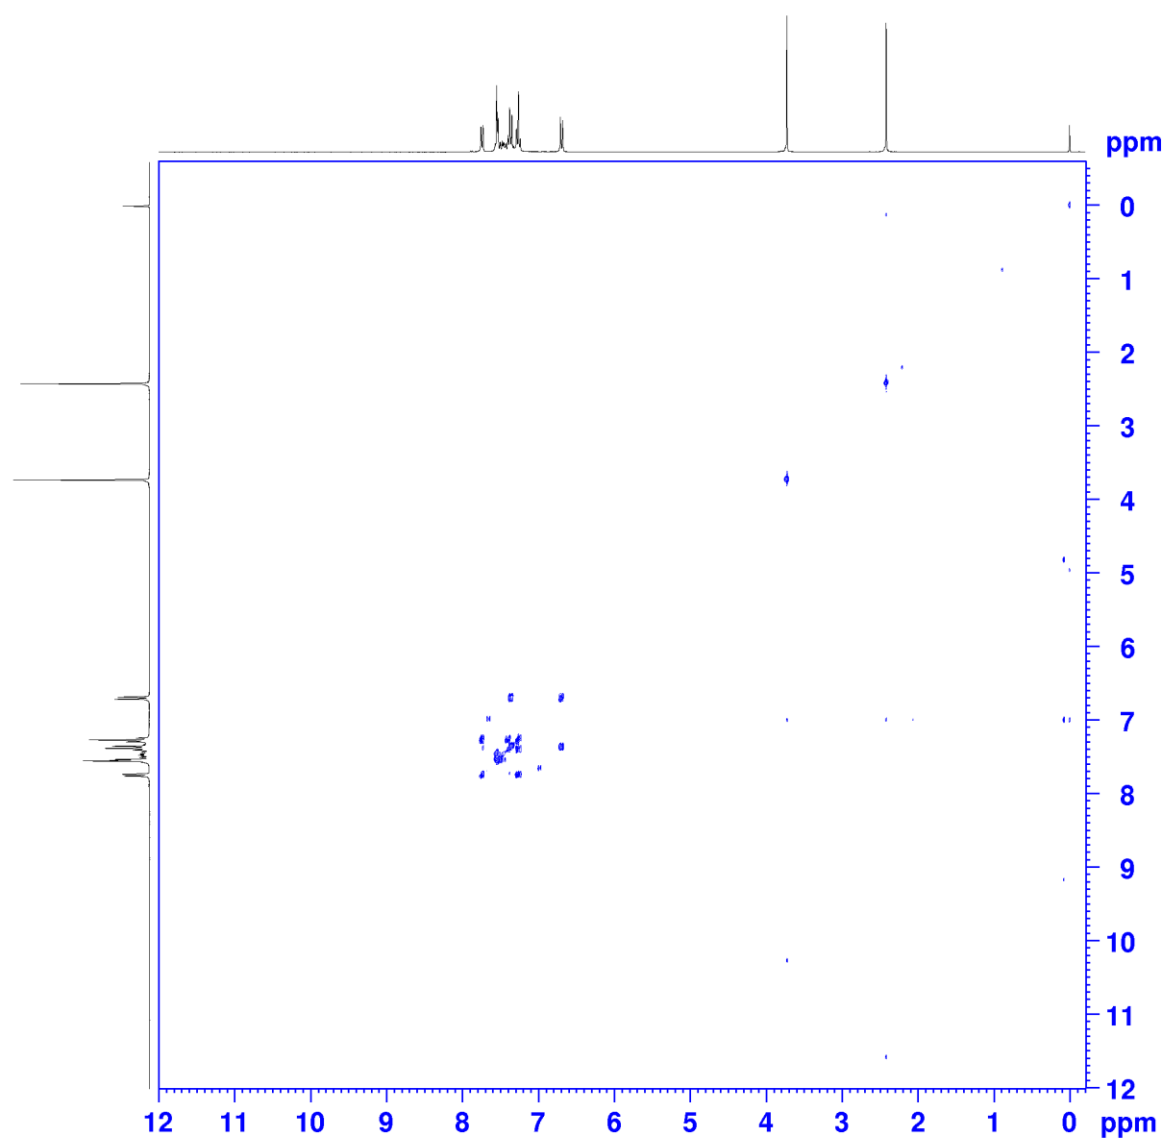

# HRMS

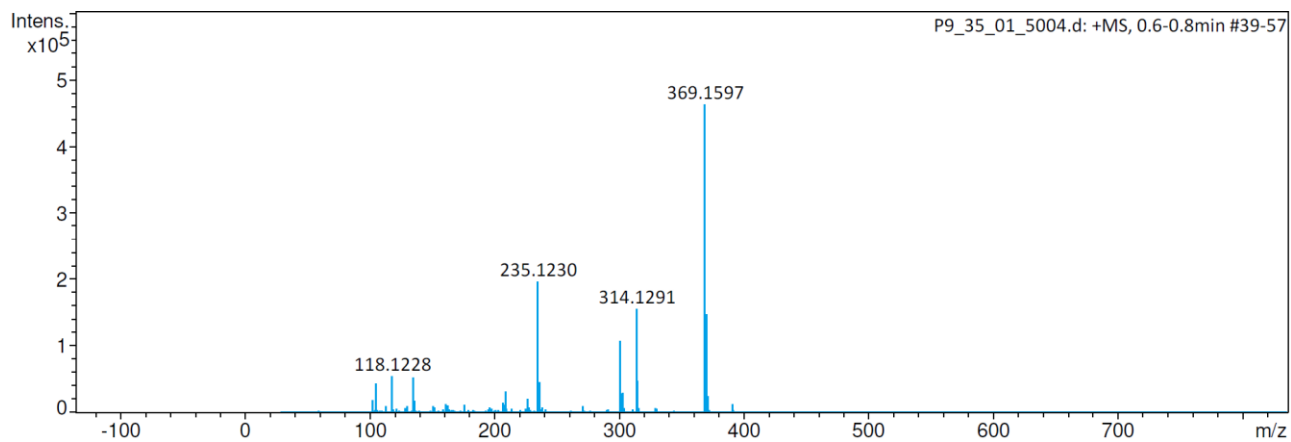

**(5-Methyl-1-phenyl-3-(*p*-tolyl)-1*H*-pyrazol-4-yl)(phenyl)methanone (6j)**

**<sup>1</sup>H NMR**

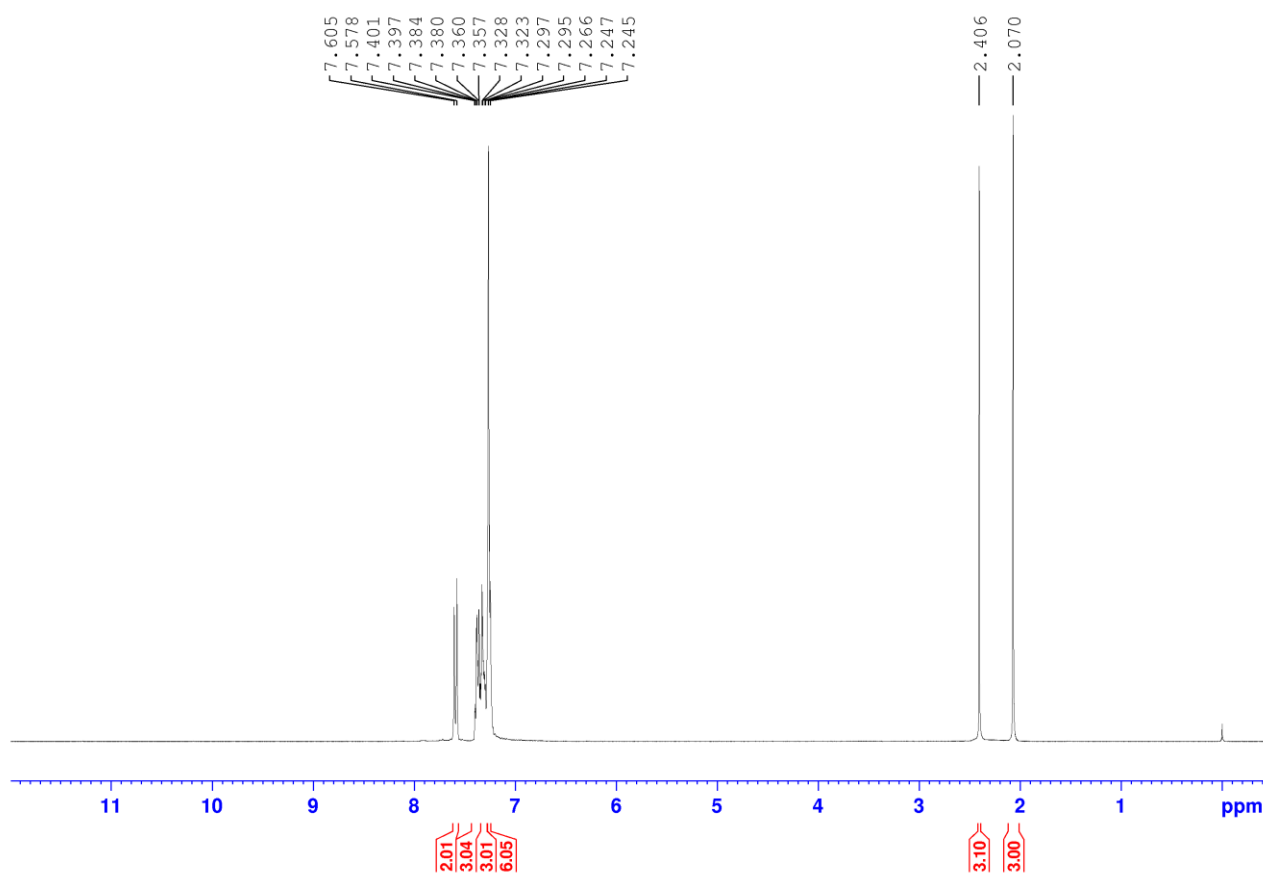

# $^{13}\text{C}$ NMR

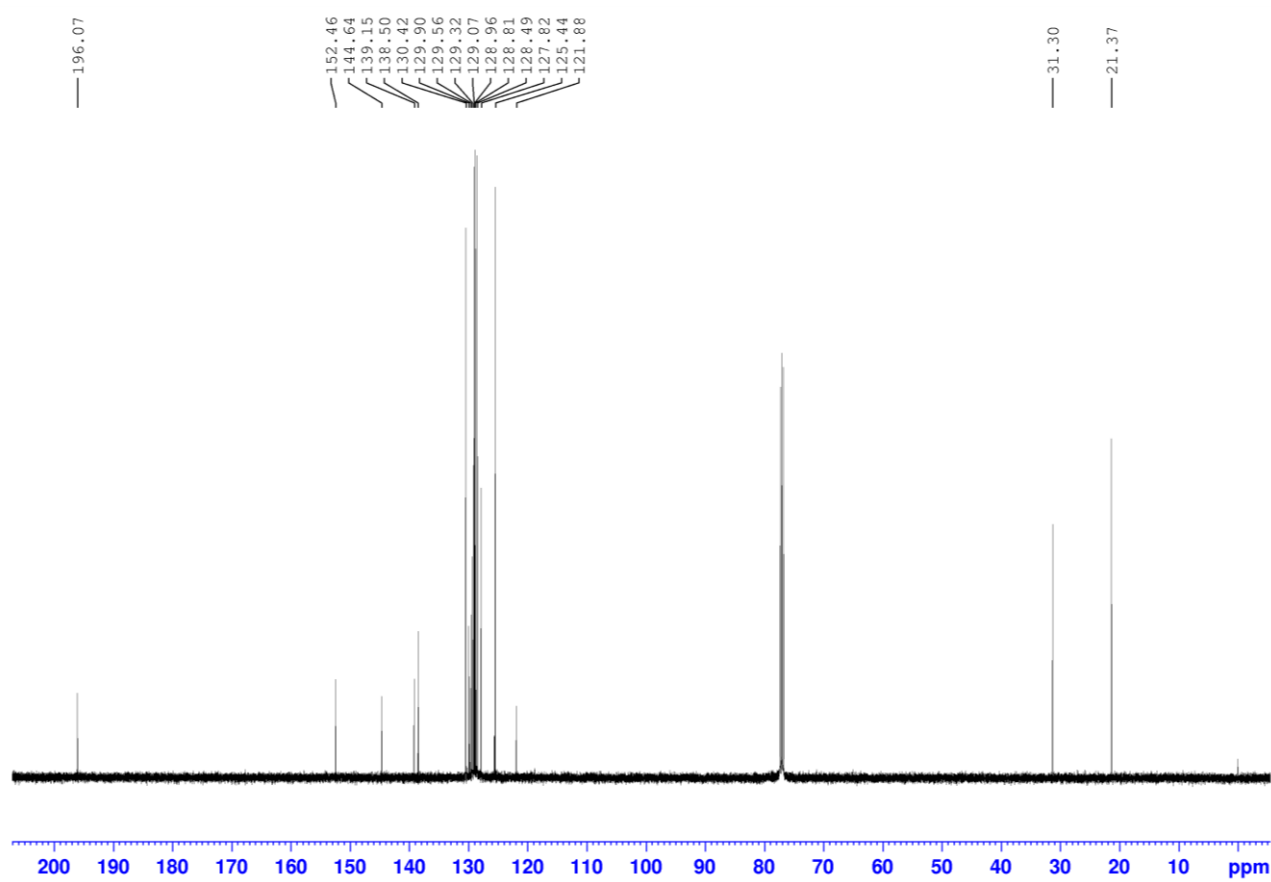



## COSY NMR

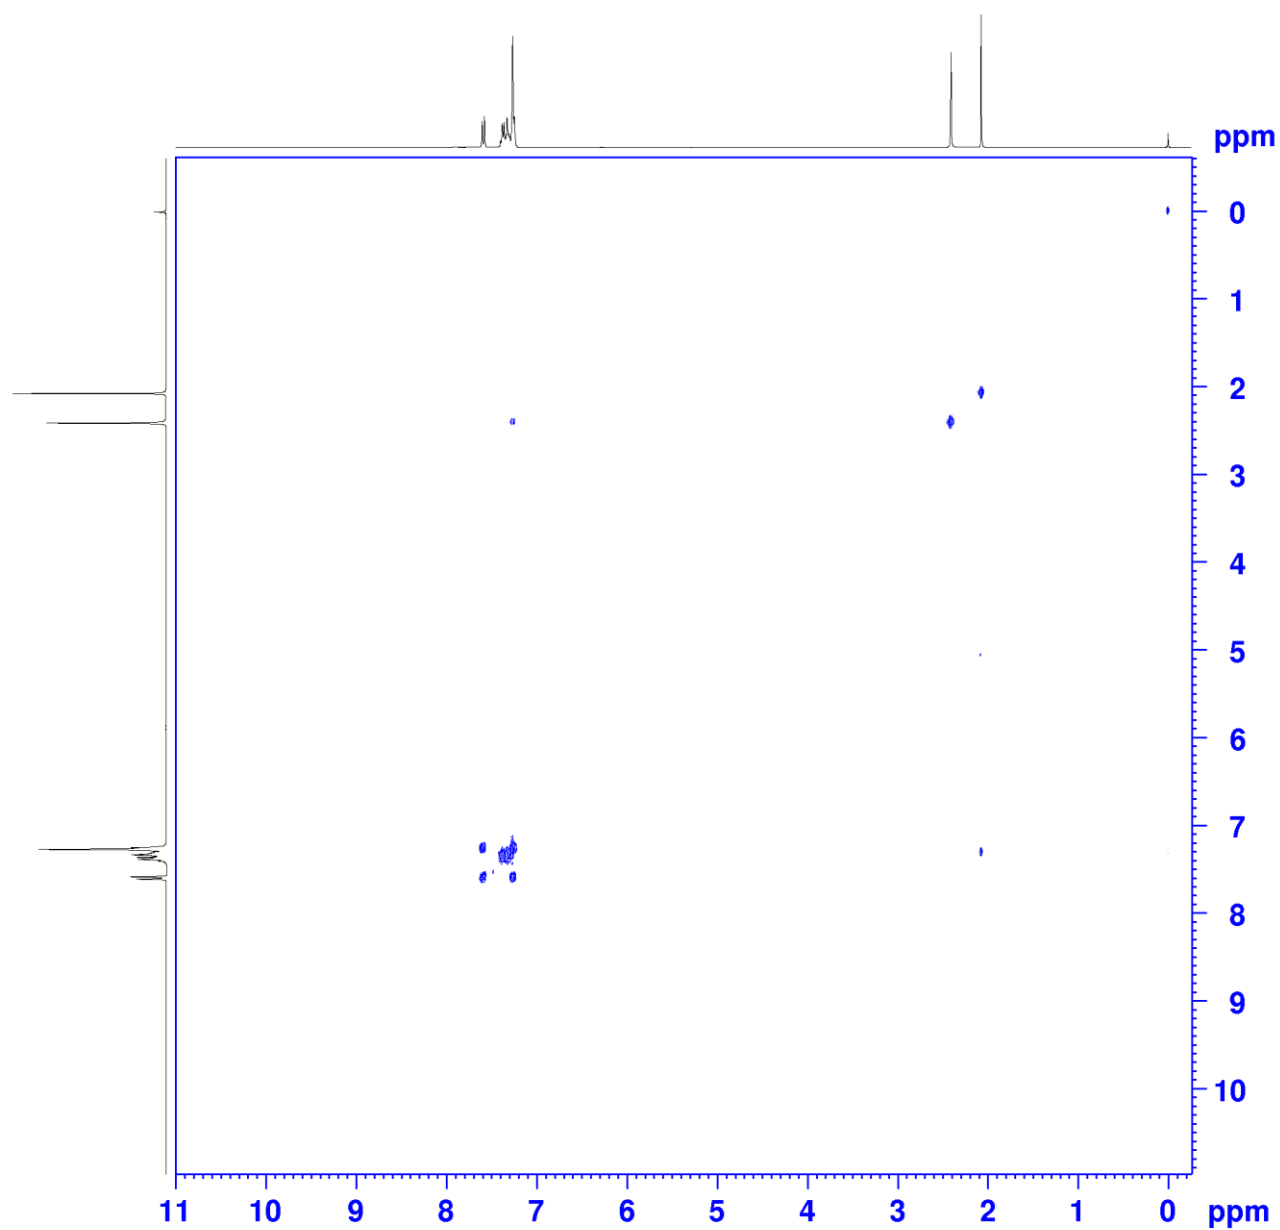

**(5-Methyl-3-(4-nitrophenyl)-1-phenyl-1*H*-pyrazol-4-yl)(phenyl)methanone (6k)**

**<sup>1</sup>H NMR**

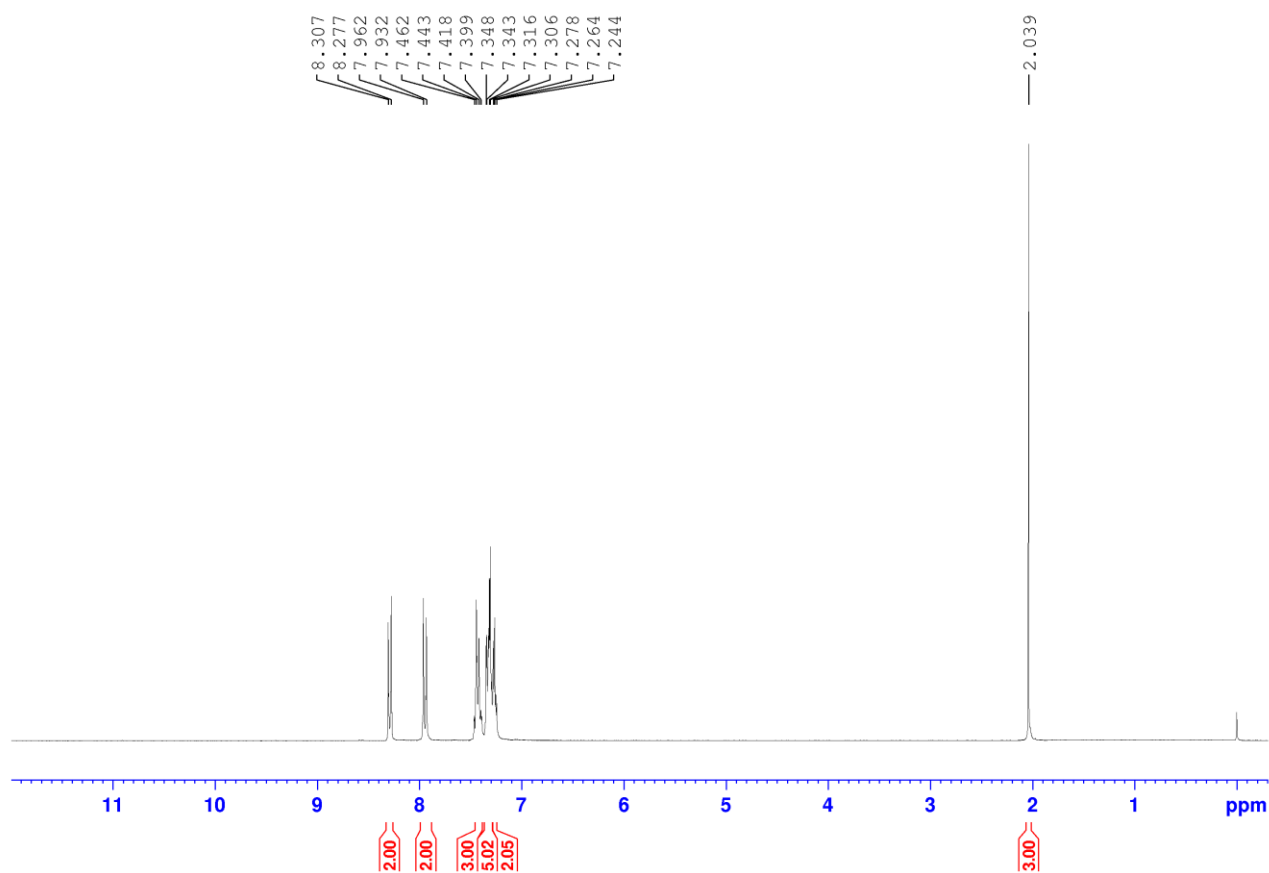

# $^{13}\text{C}$ NMR

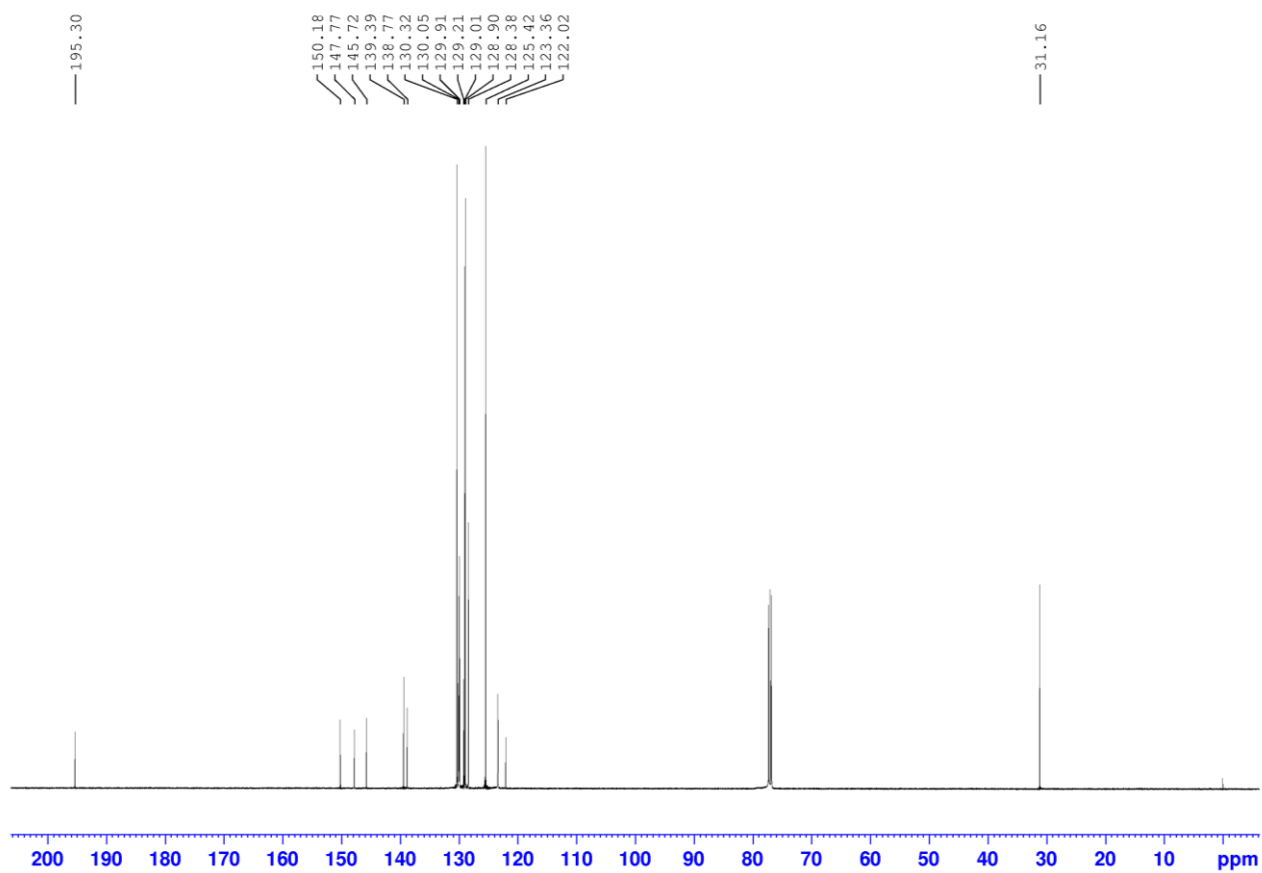

## COSY NMR

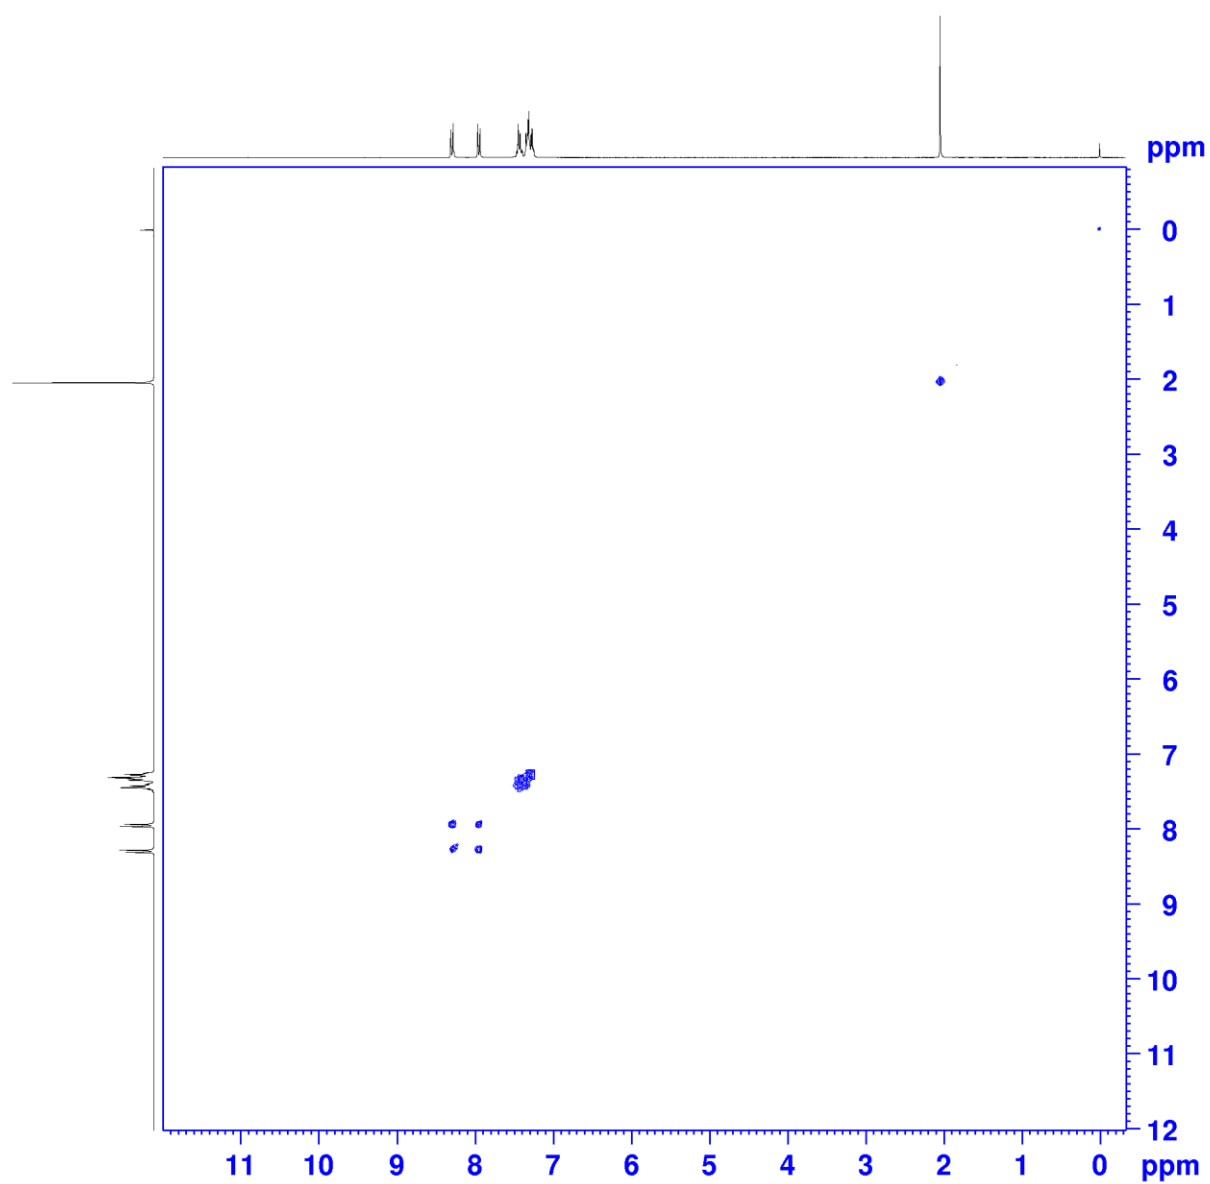

# HRMS

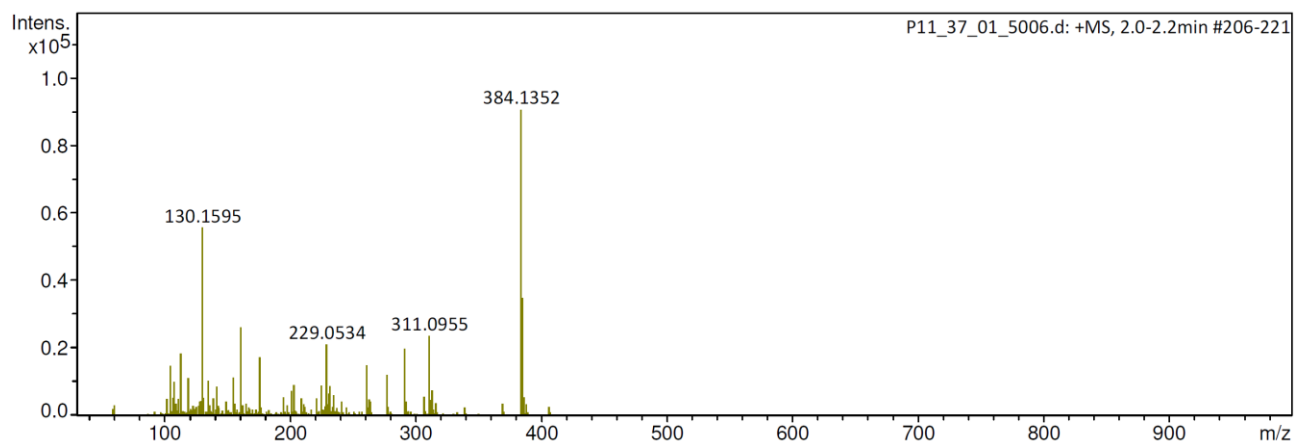

**(3-(2-Chlorophenyl)-5-methyl-1-phenyl-1*H*-pyrazol-4-yl)(phenyl)methanone (6l)**

**<sup>1</sup>H NMR**

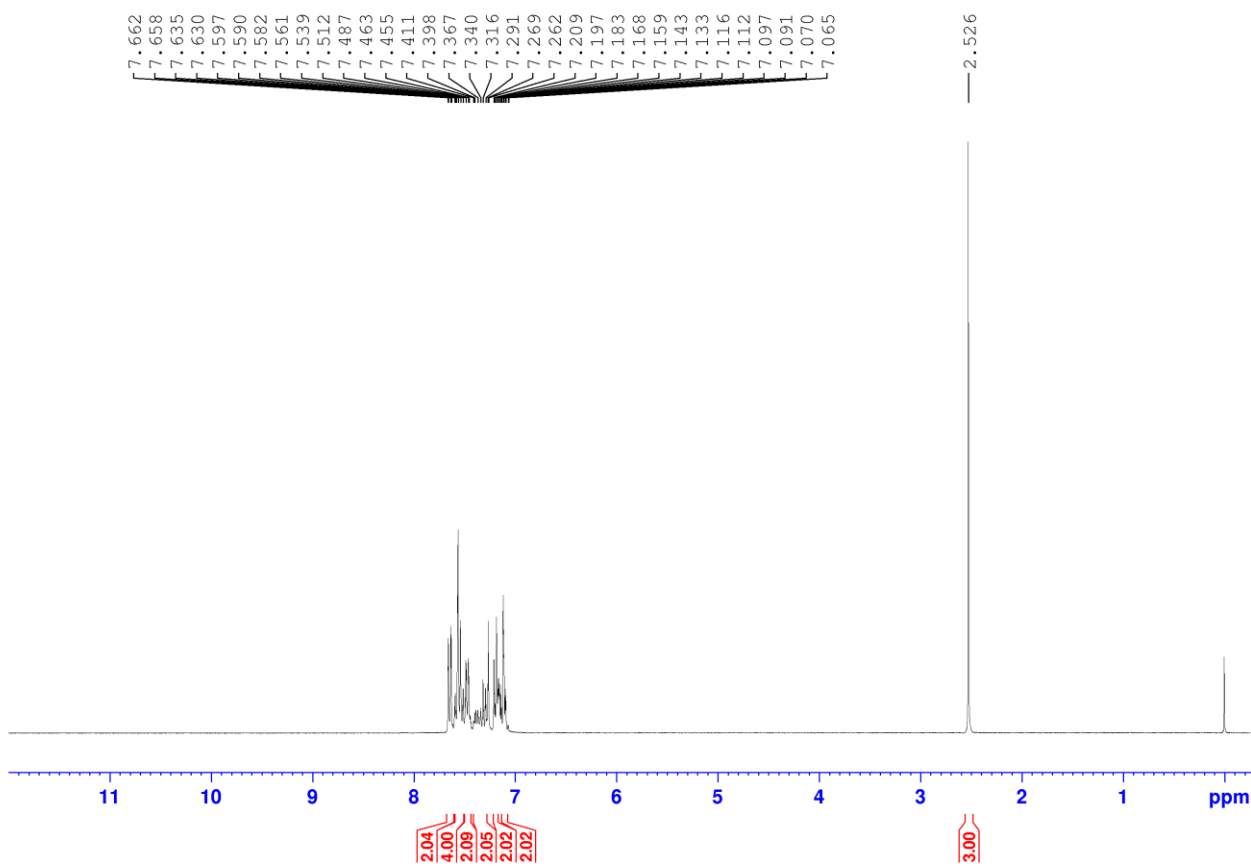

# $^{13}\text{C}$ NMR

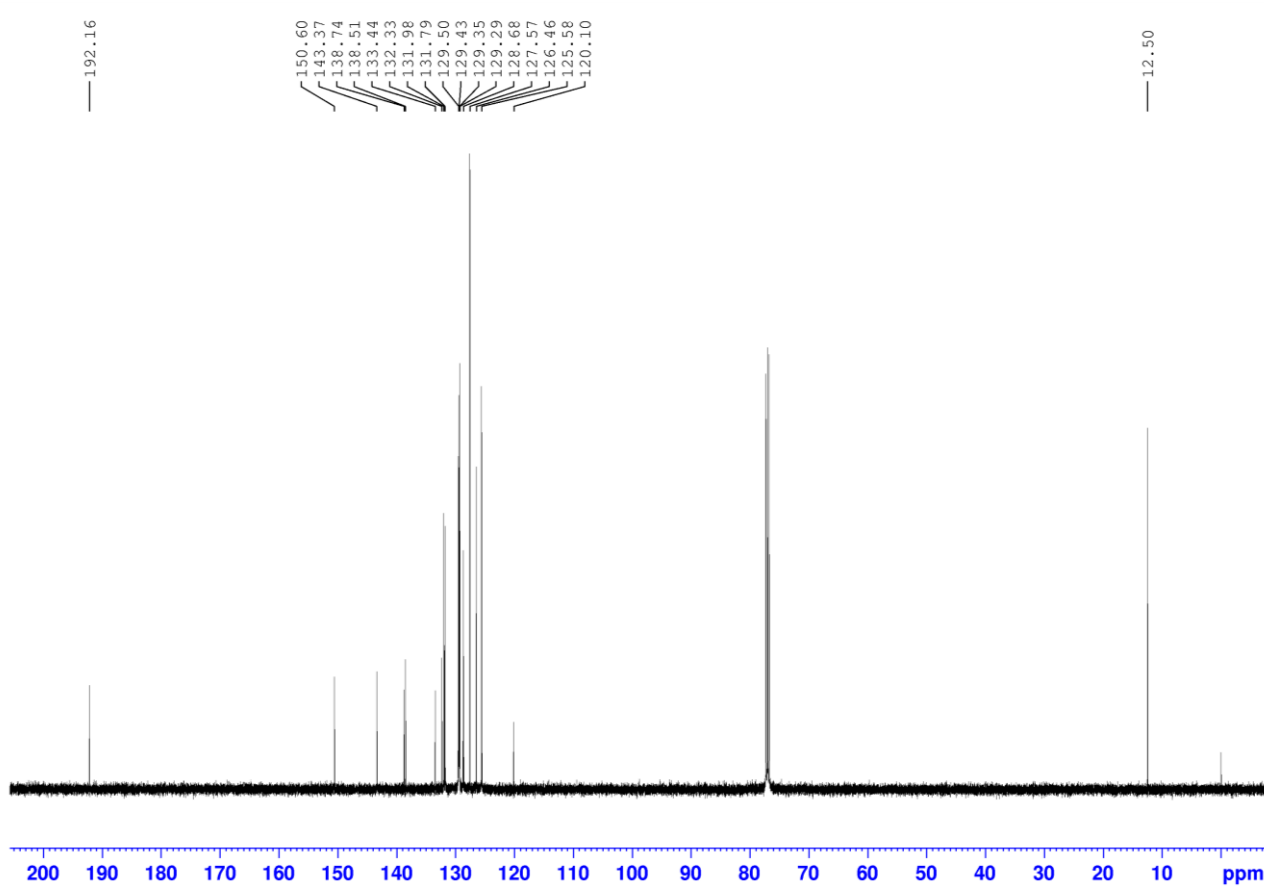

## COSY NMR

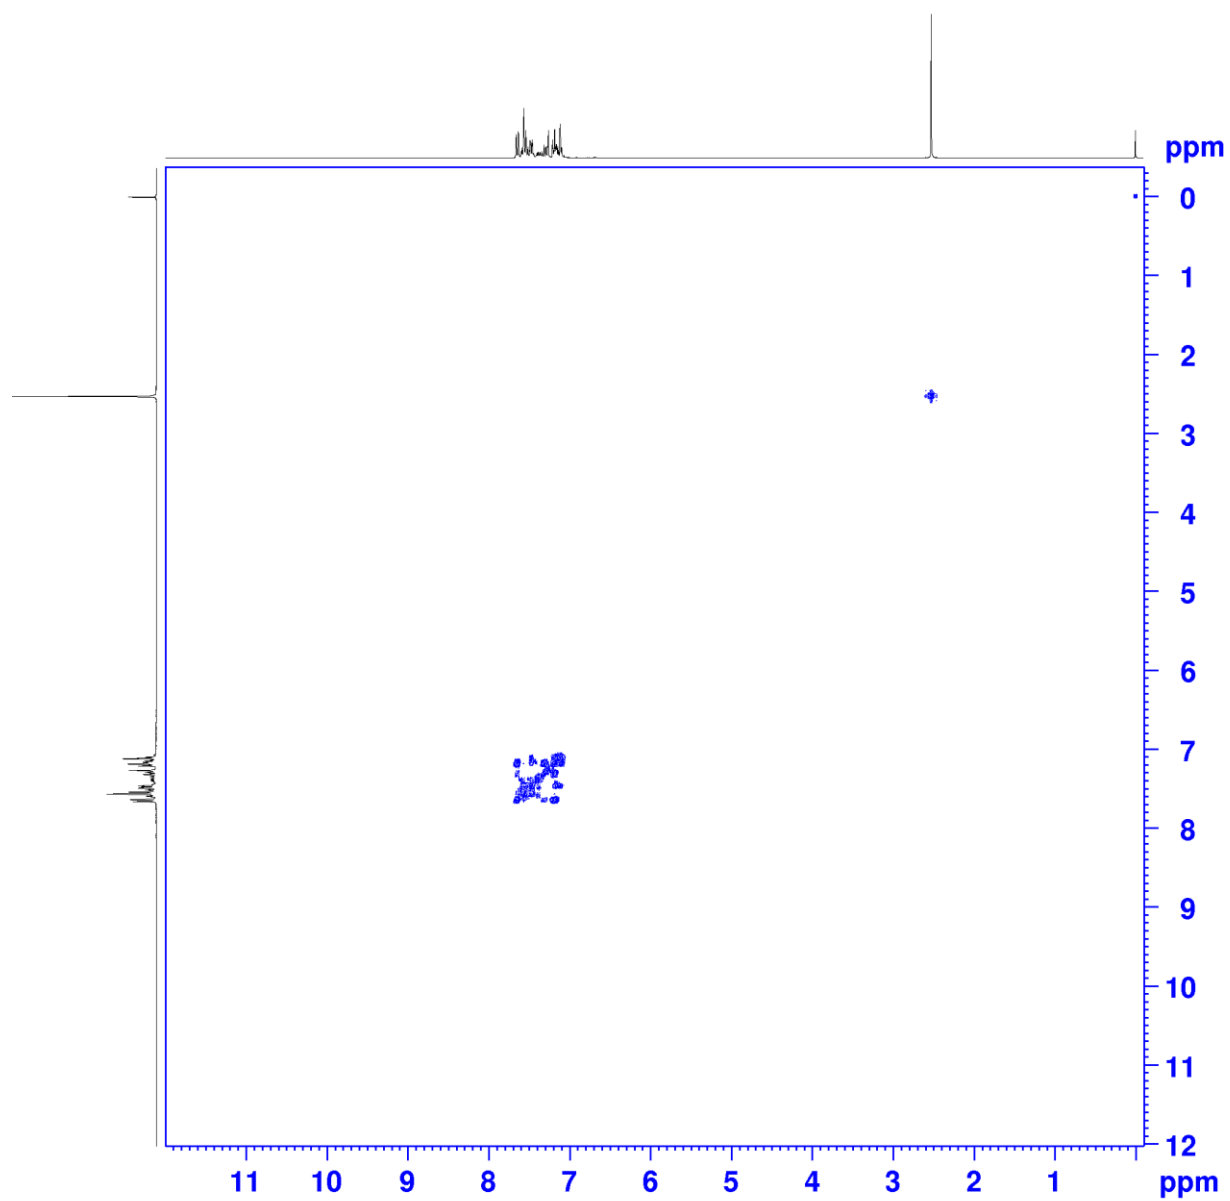



**HRMS**

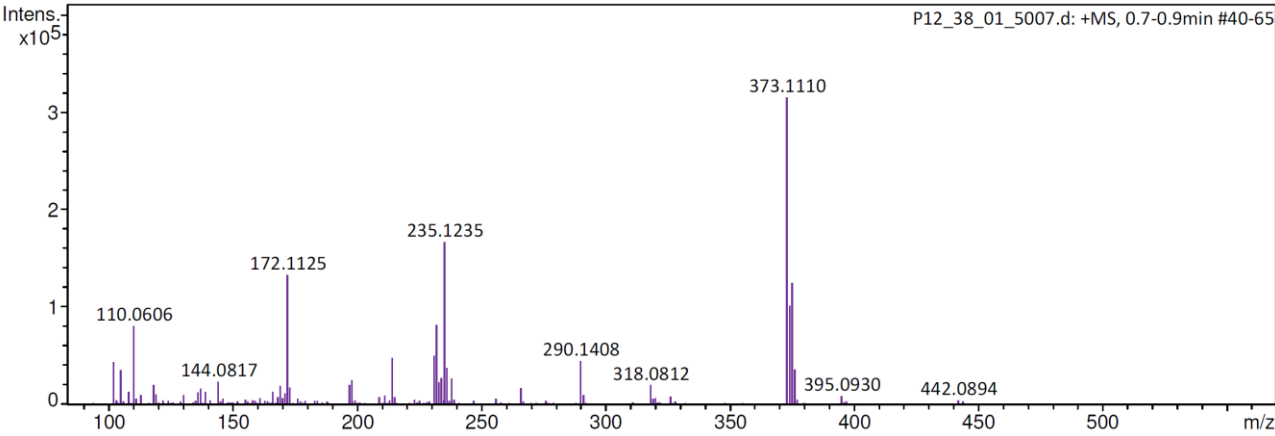

**(3-(3-Chlorophenyl)-5-methyl-1-phenyl-1*H*-pyrazol-4-yl)(phenyl)methanone  
(6m)**

**<sup>1</sup>H NMR**

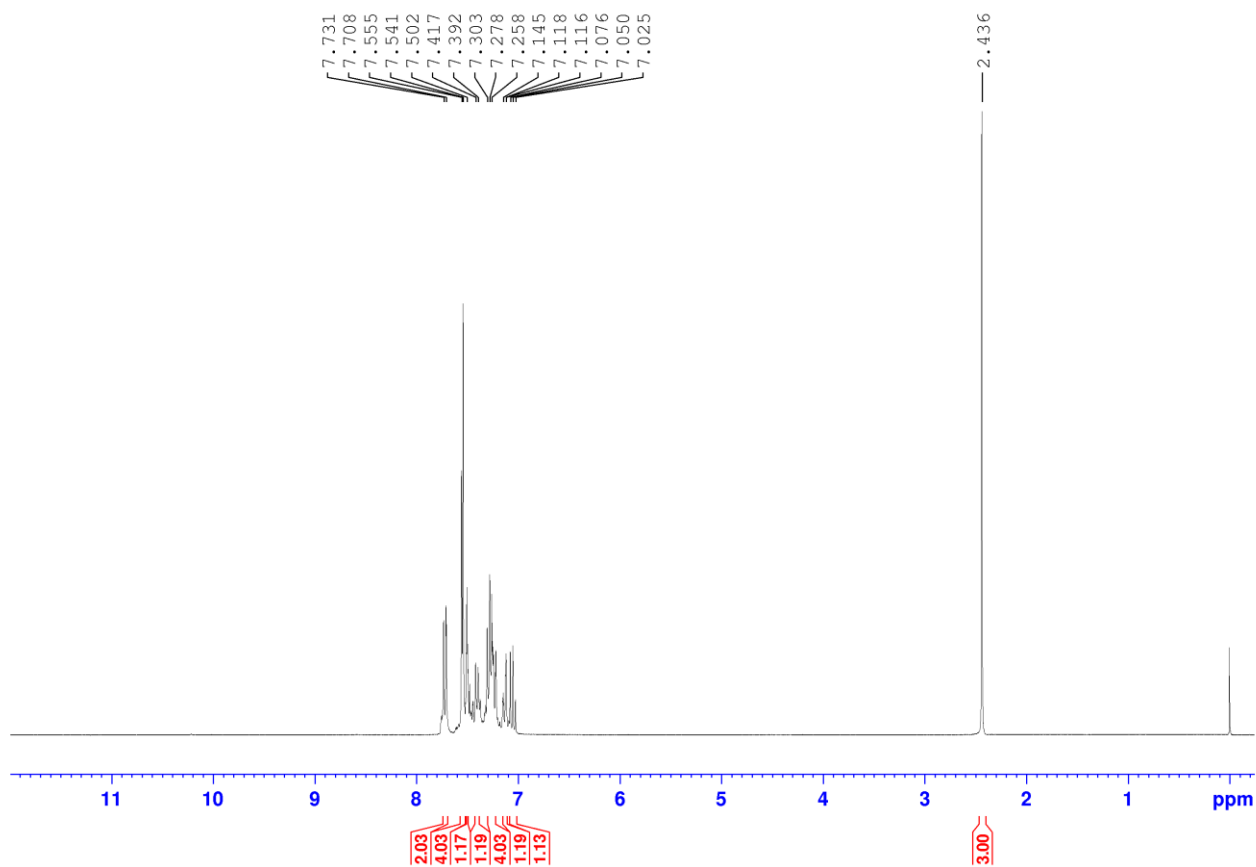

# $^{13}\text{C}$ NMR

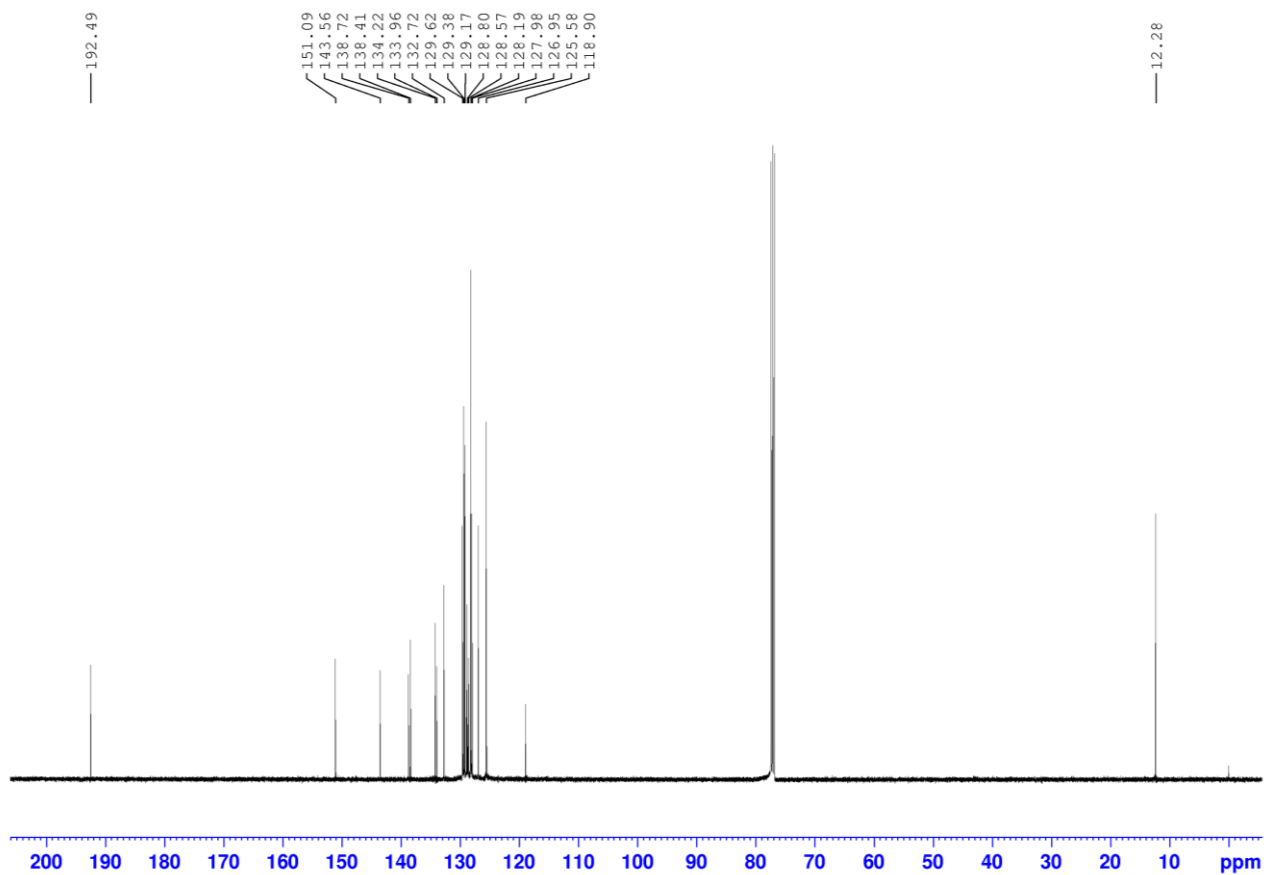

## COSY NMR

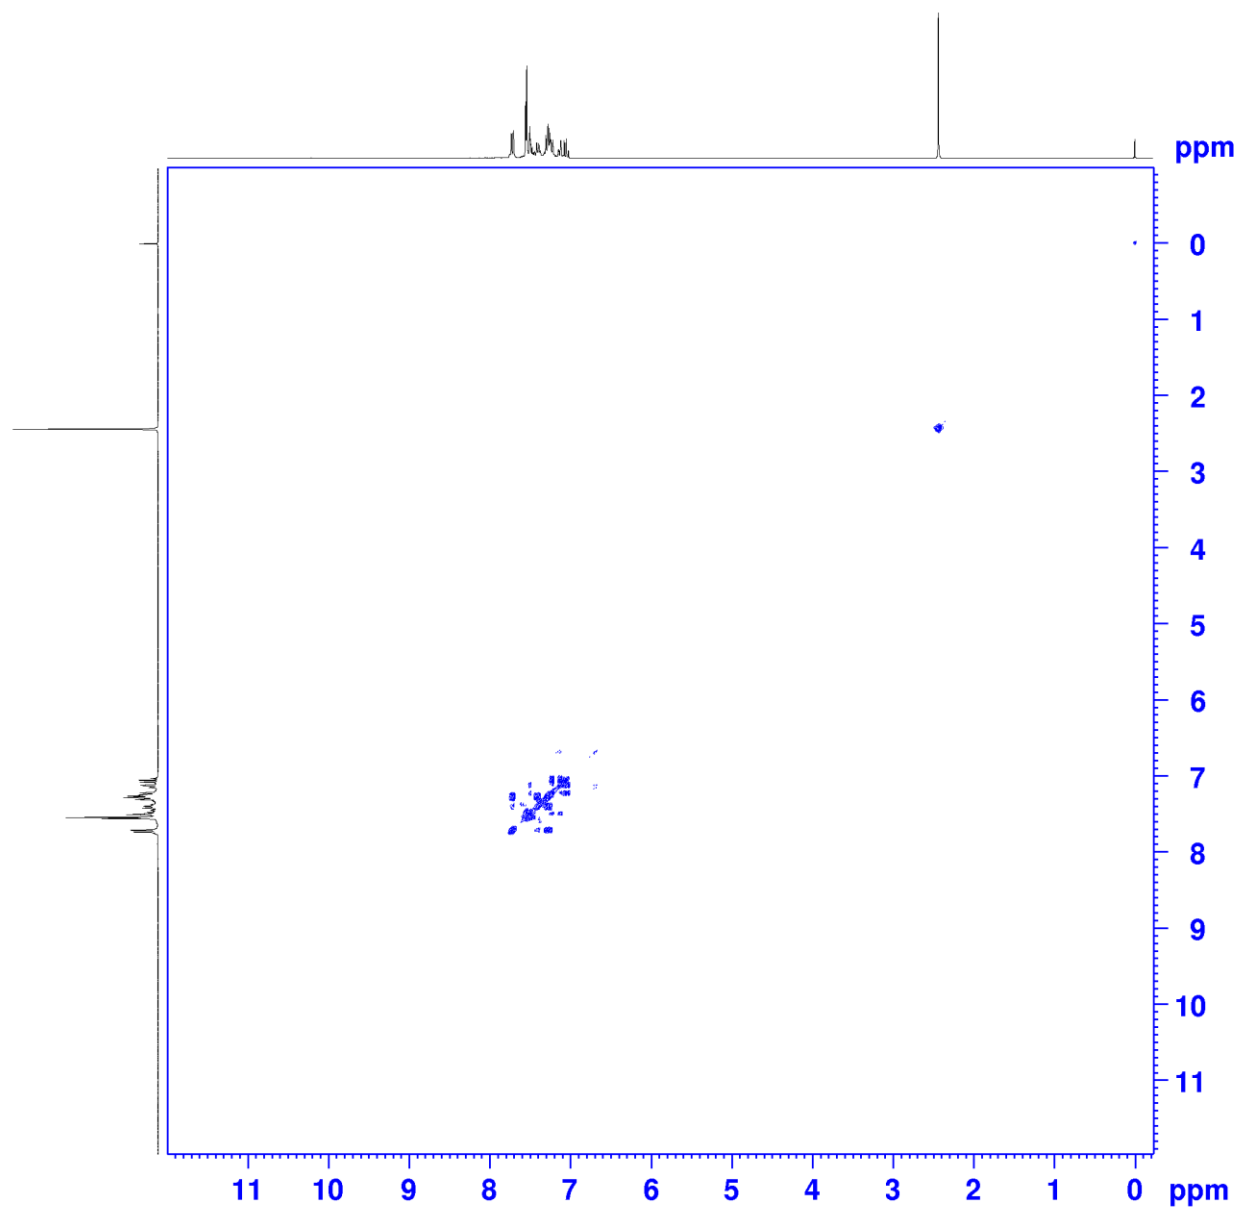

**HRMS**

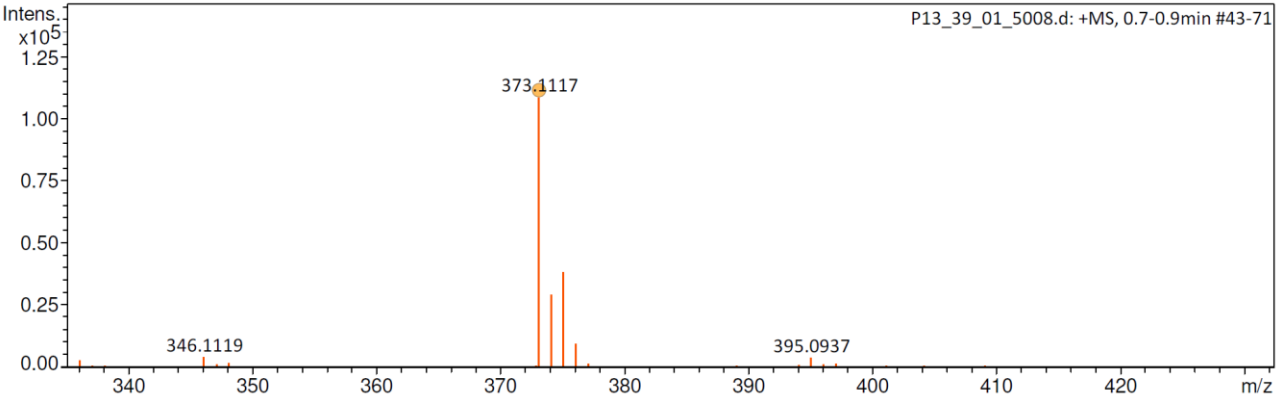

**(3-(4-Chlorophenyl)-5-methyl-1-phenyl-1*H*-pyrazol-4-yl)(phenyl)methanone (6n)**

**<sup>1</sup>H NMR**

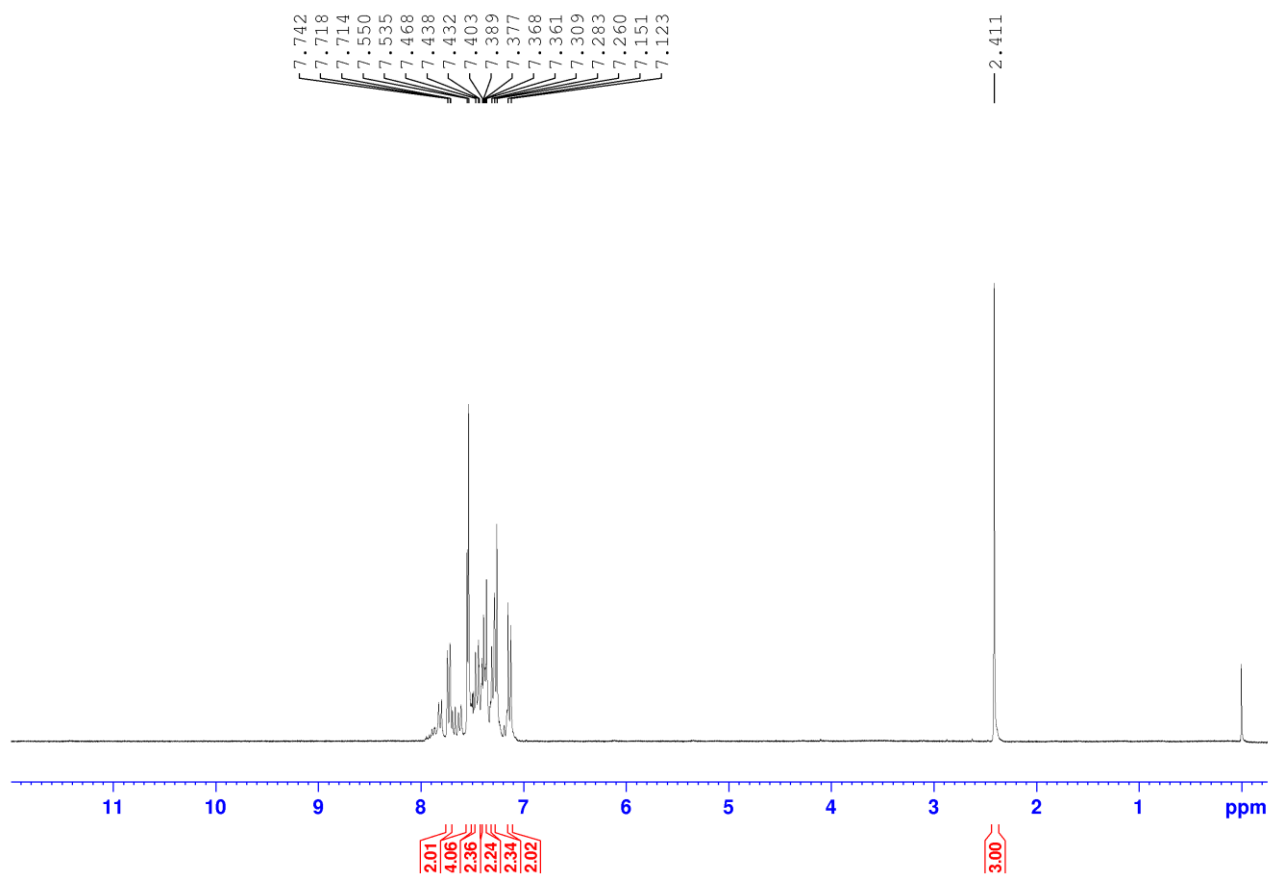

# $^{13}\text{C}$ NMR

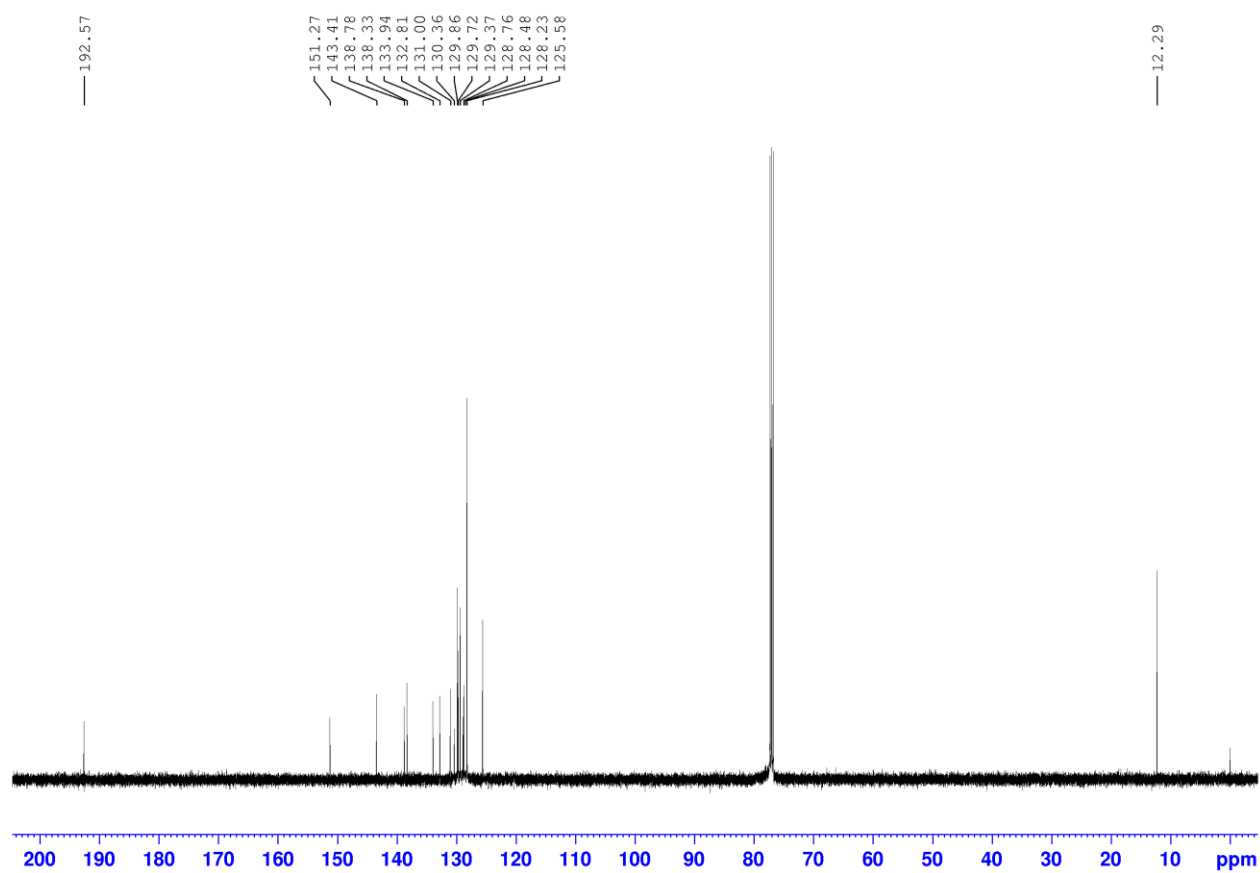

## COSY NMR

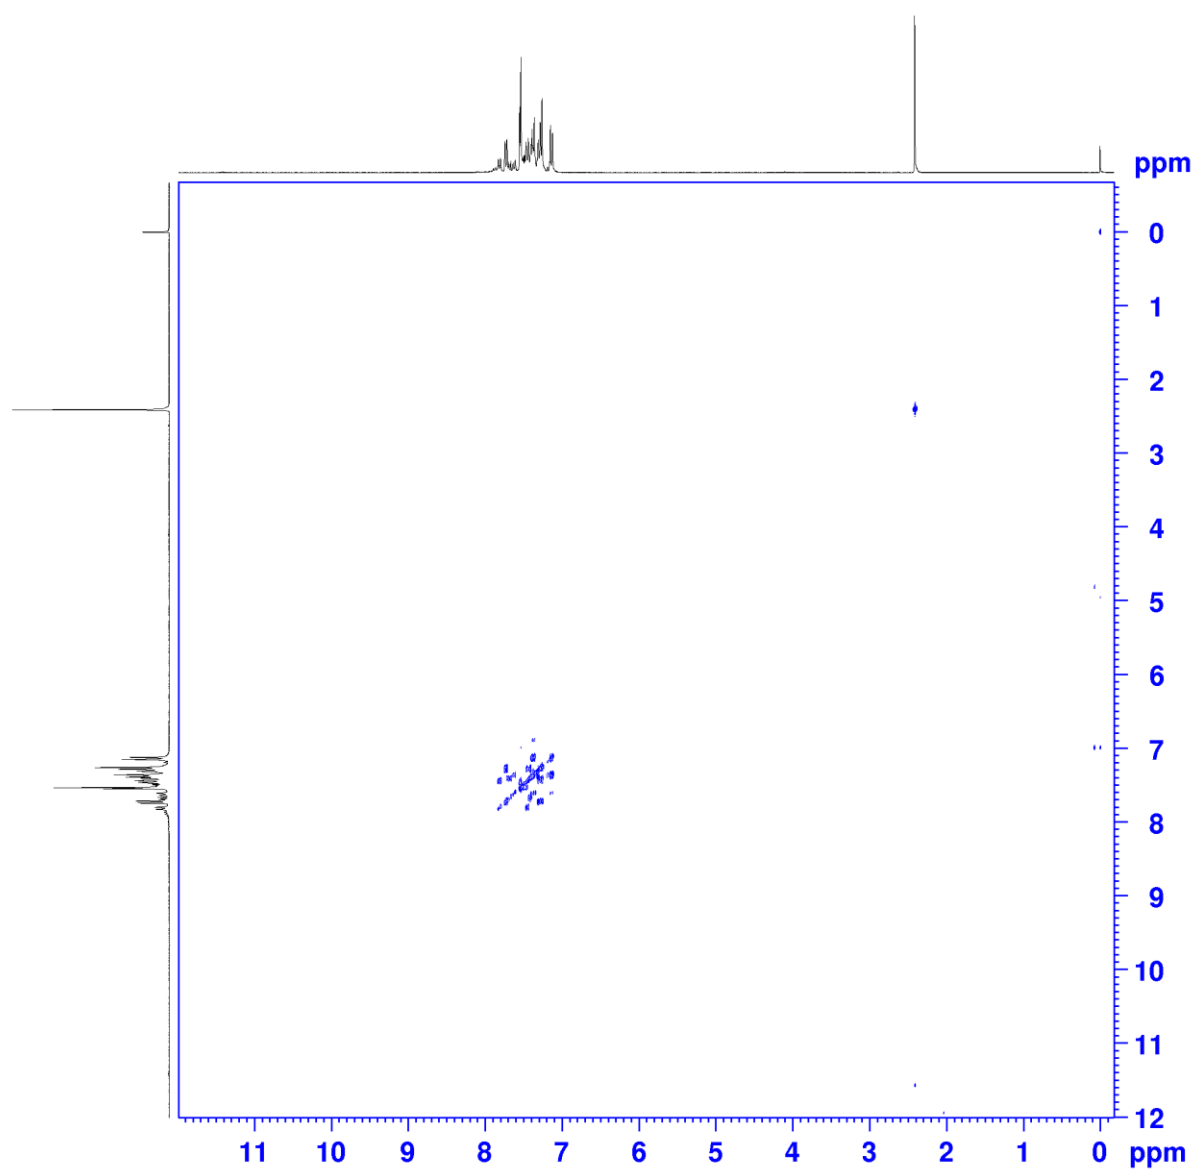



**HRMS**

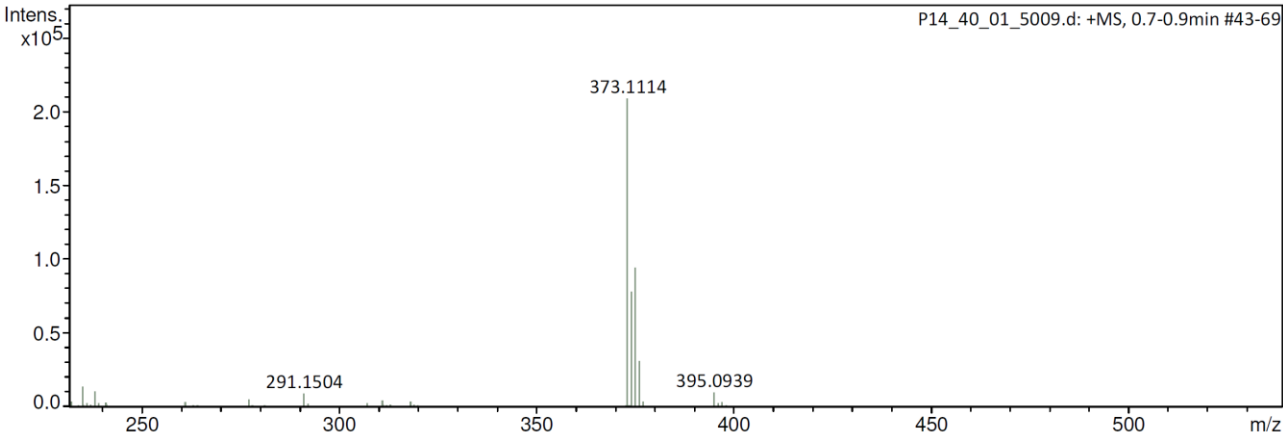

# Phenyl(1,3,5-triphenyl-1*H*-pyrazol-4-yl)methanone (6o)

## <sup>1</sup>H NMR

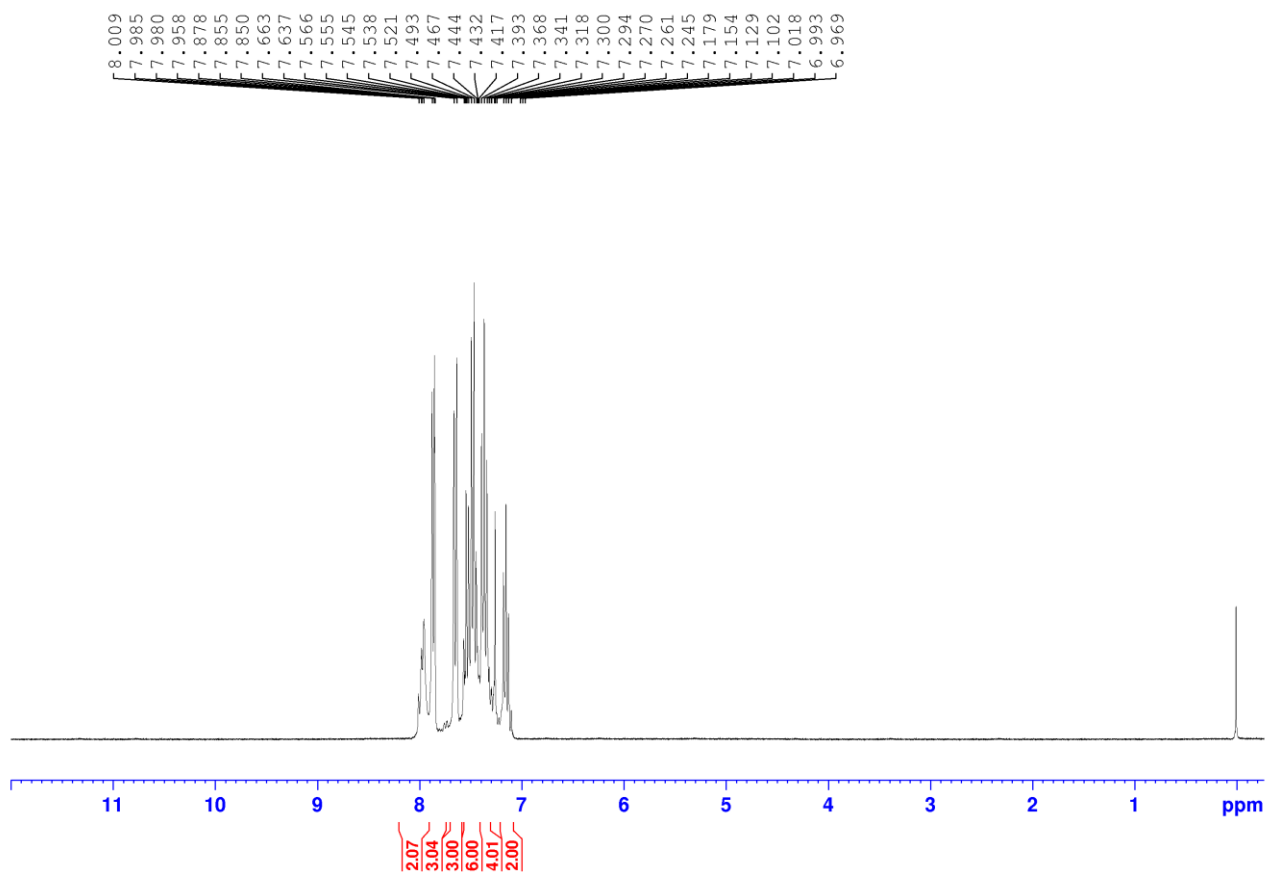

# $^{13}\text{C}$ NMR

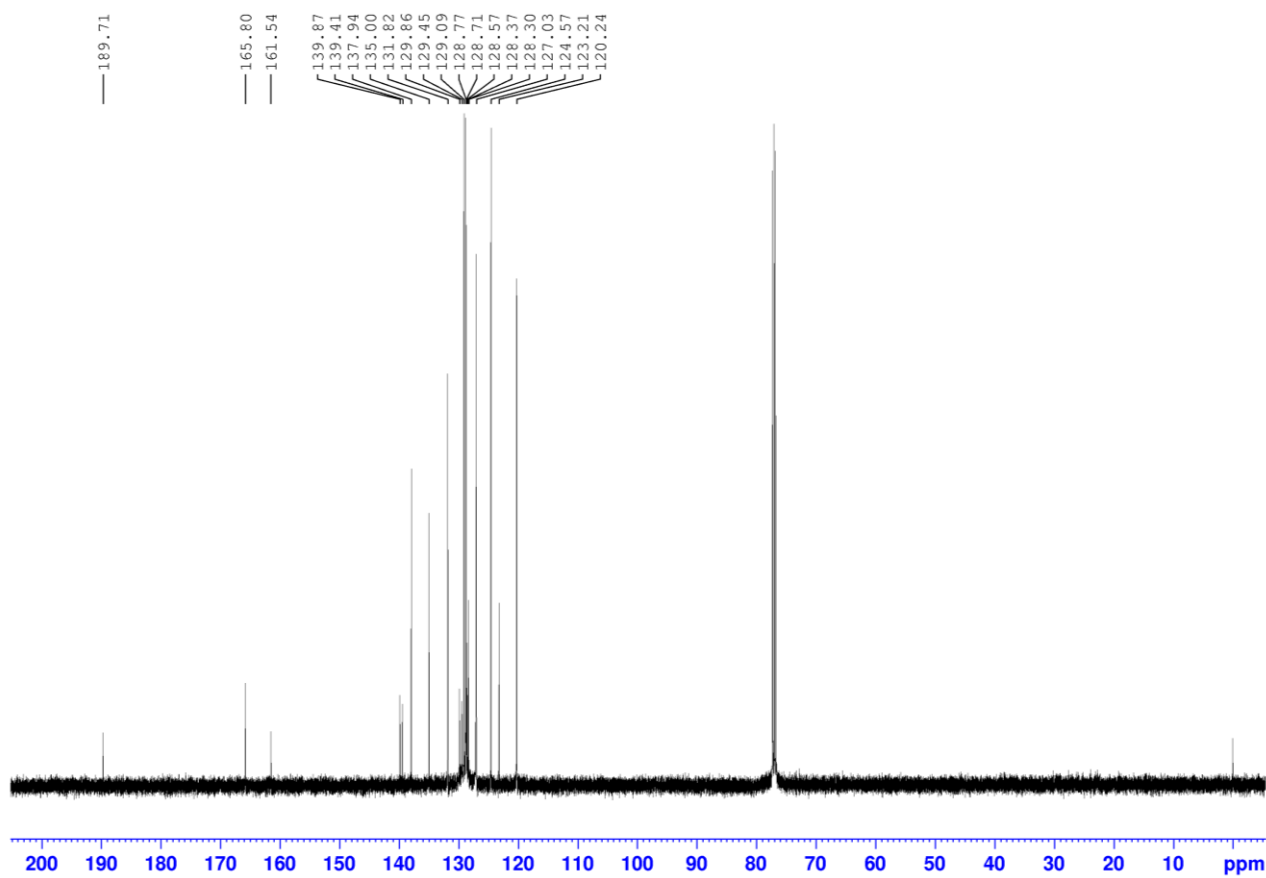

## COSY NMR

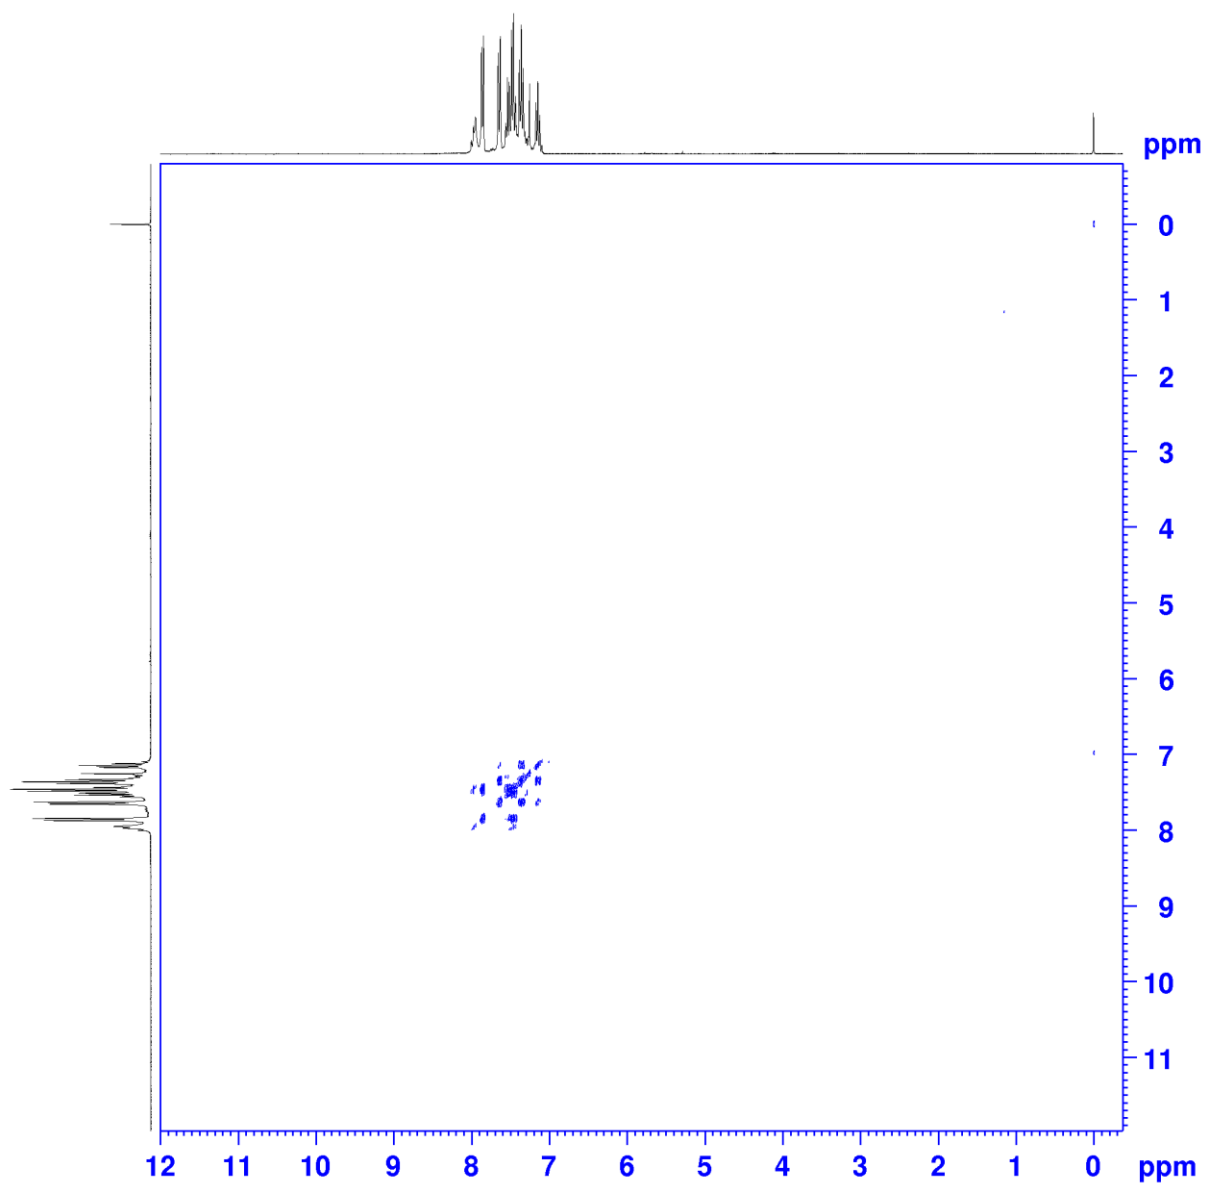

**HRMS**

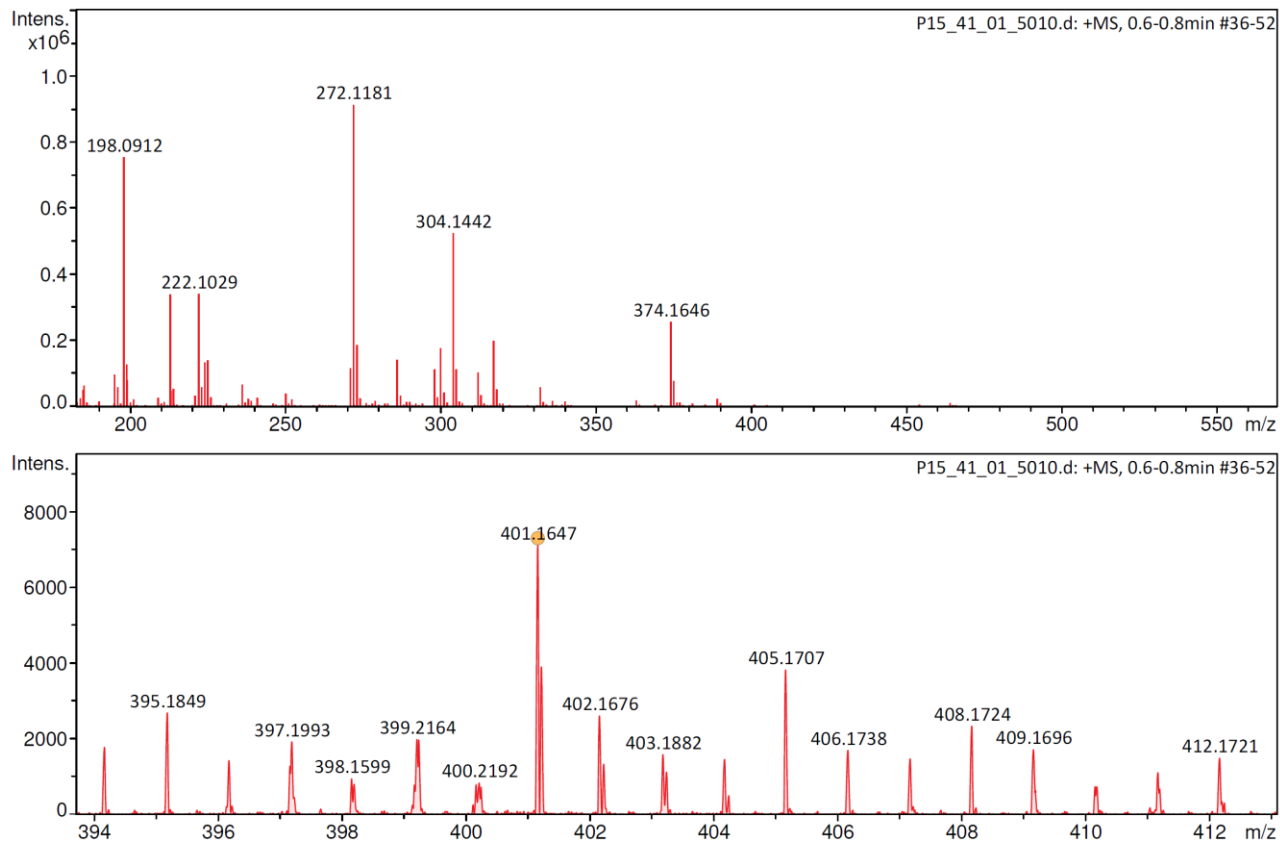

**$^1\text{H}$  NMR spectra of crude reaction mixtures illustrated in Table 1.**

**Entry 1**

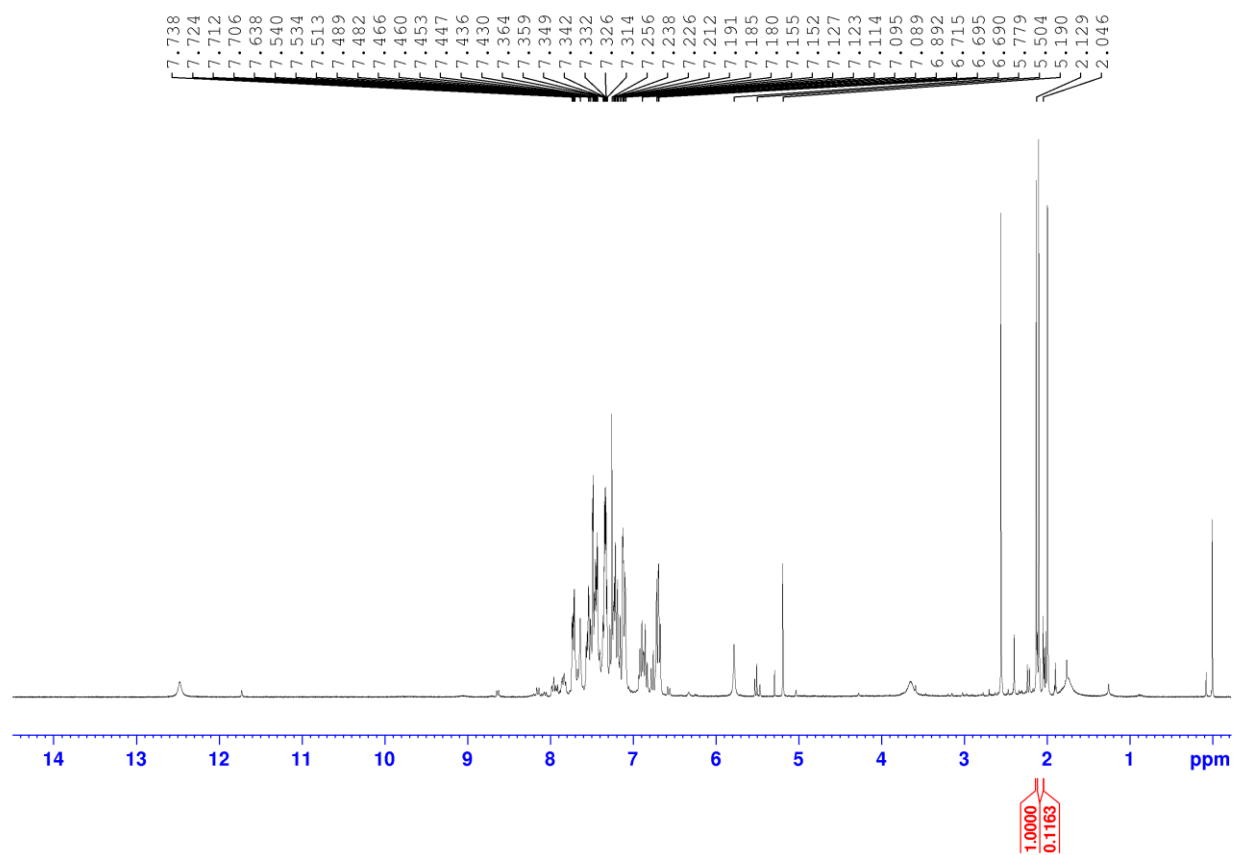

## Entry 2

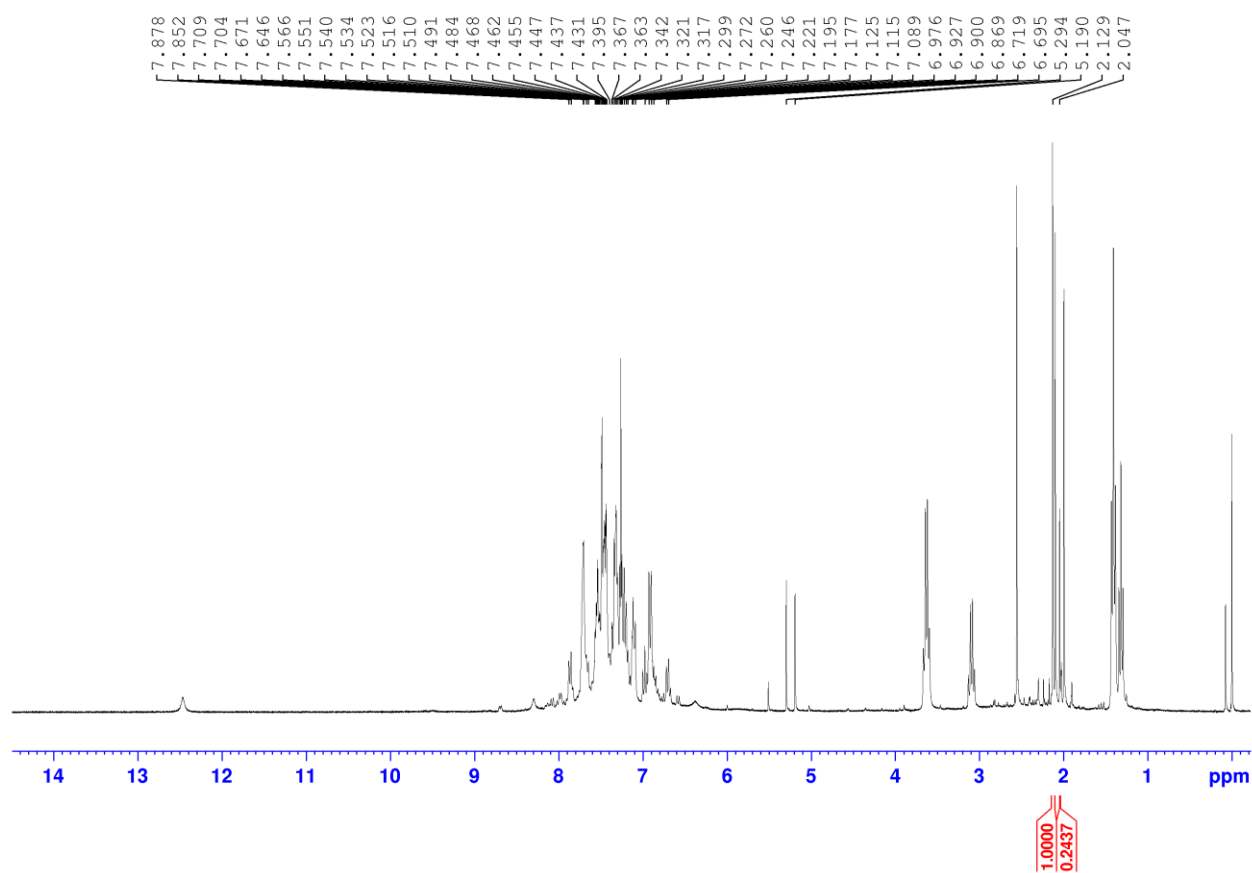

## Entry 3

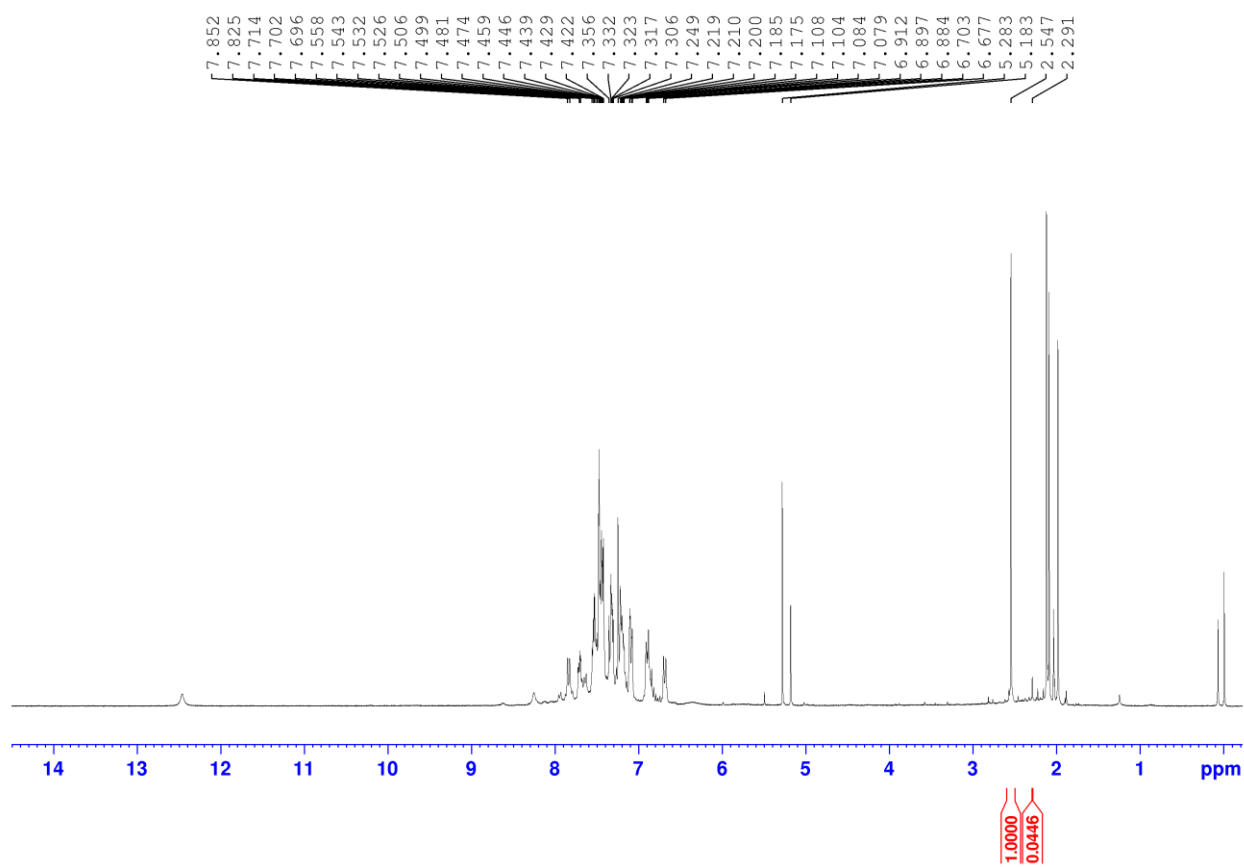



## Entry 4

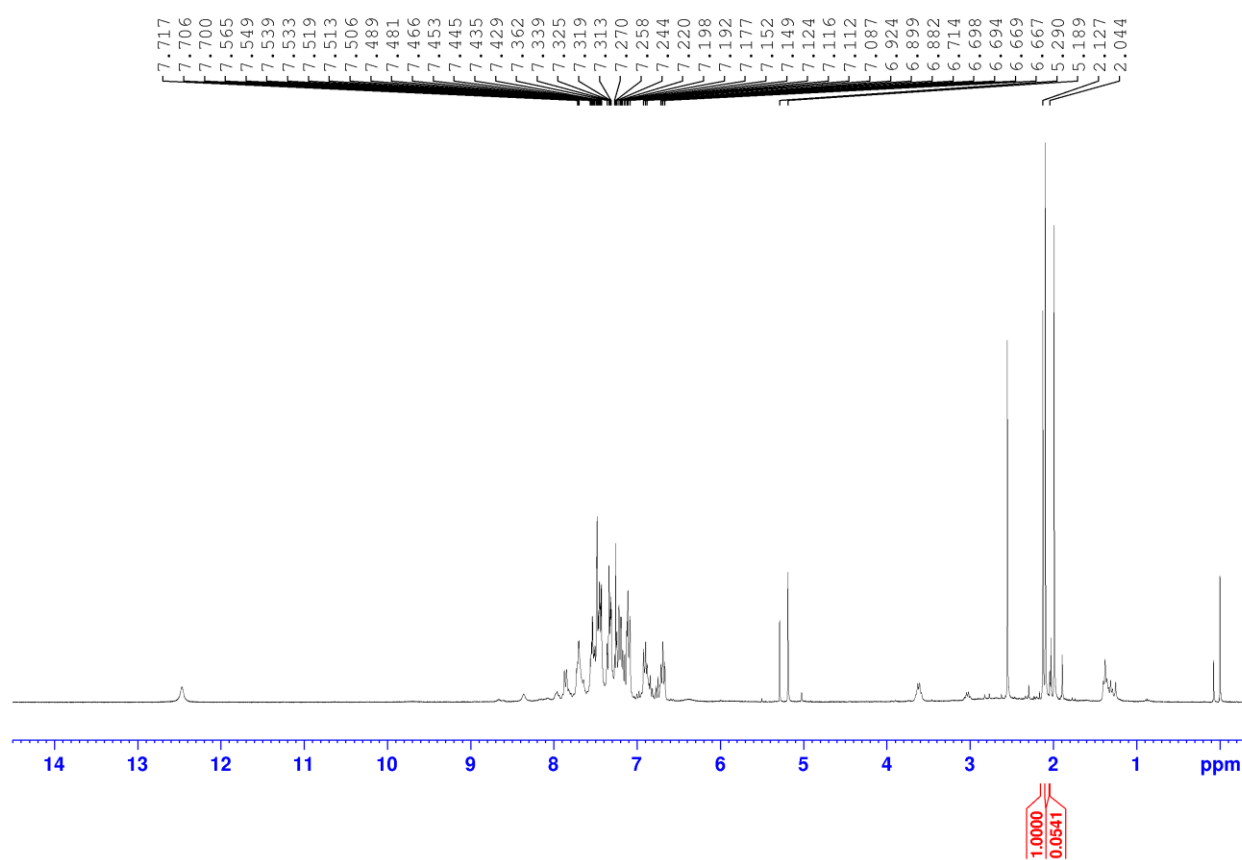

## Entry 5

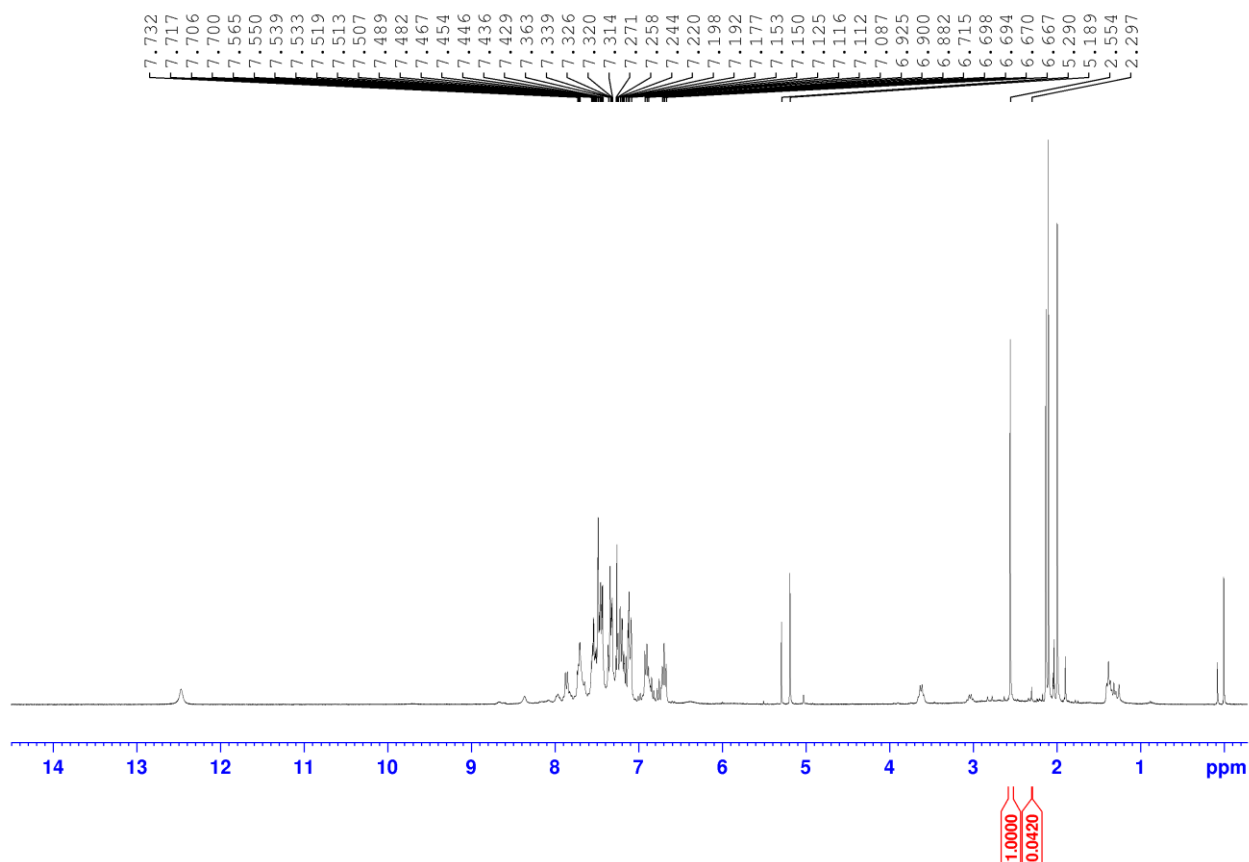

# Entry 6

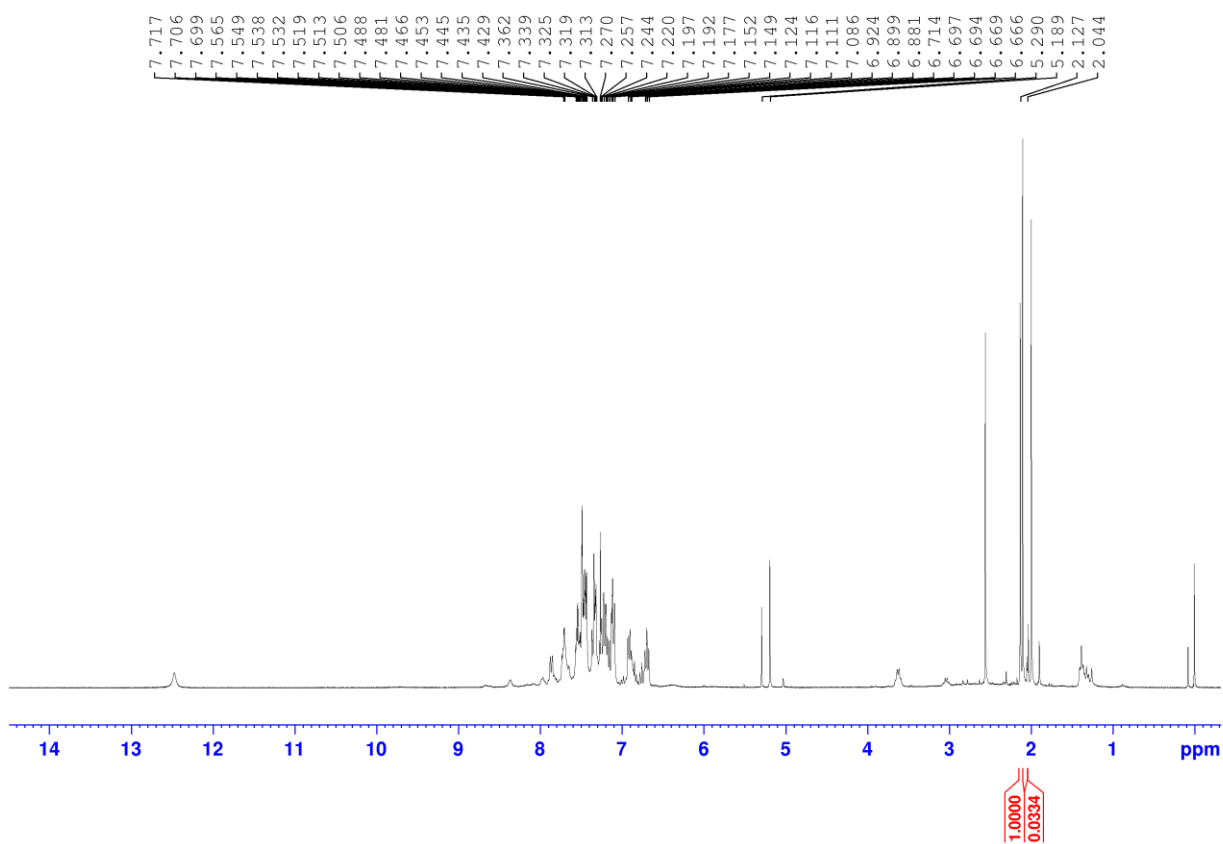

## Entry 8

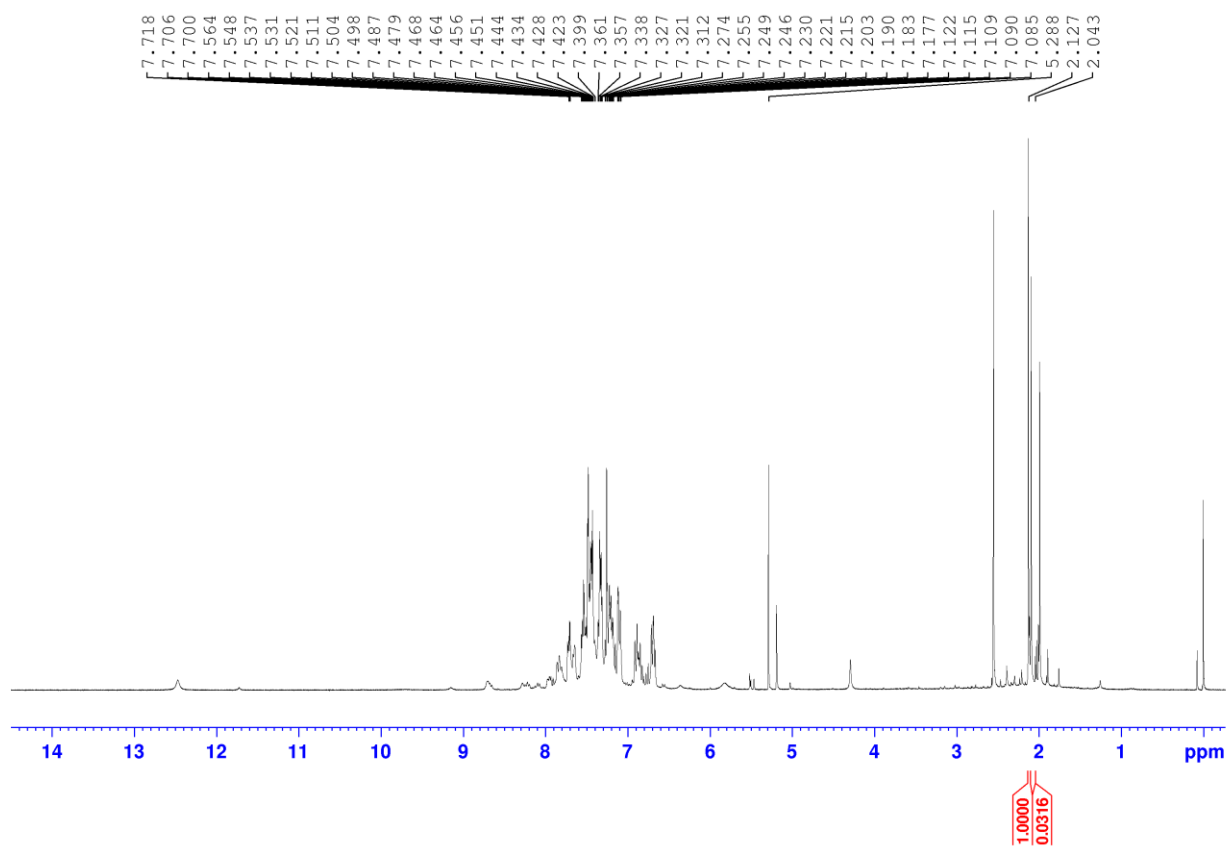

## Entry 9

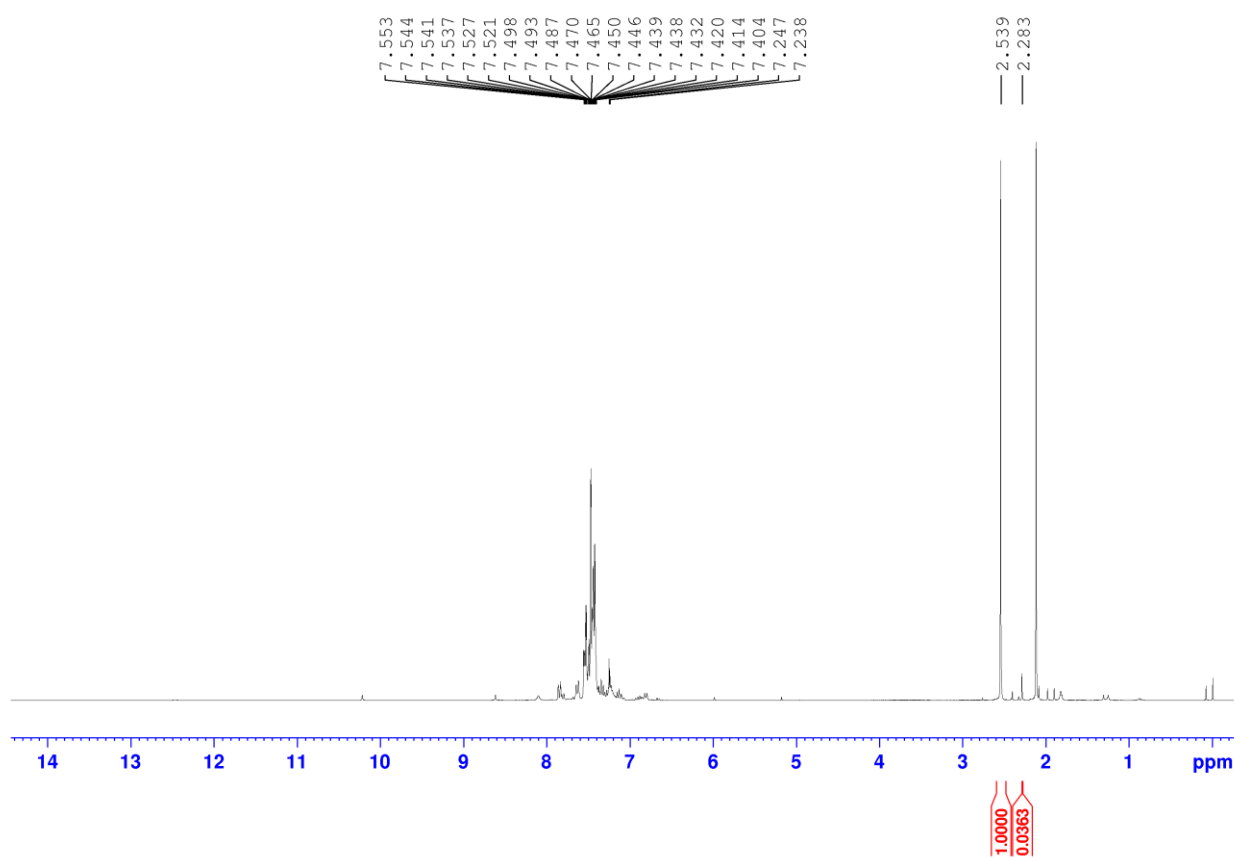

## Entry 10

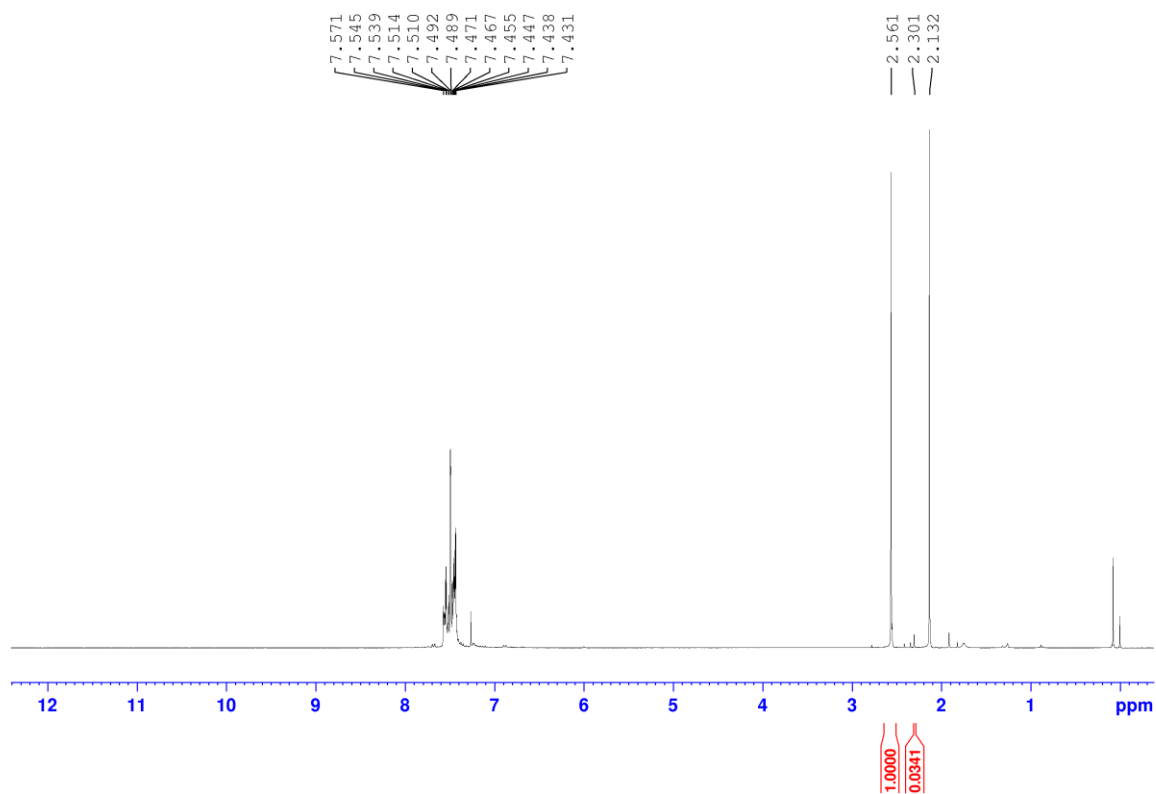

## Entry 11

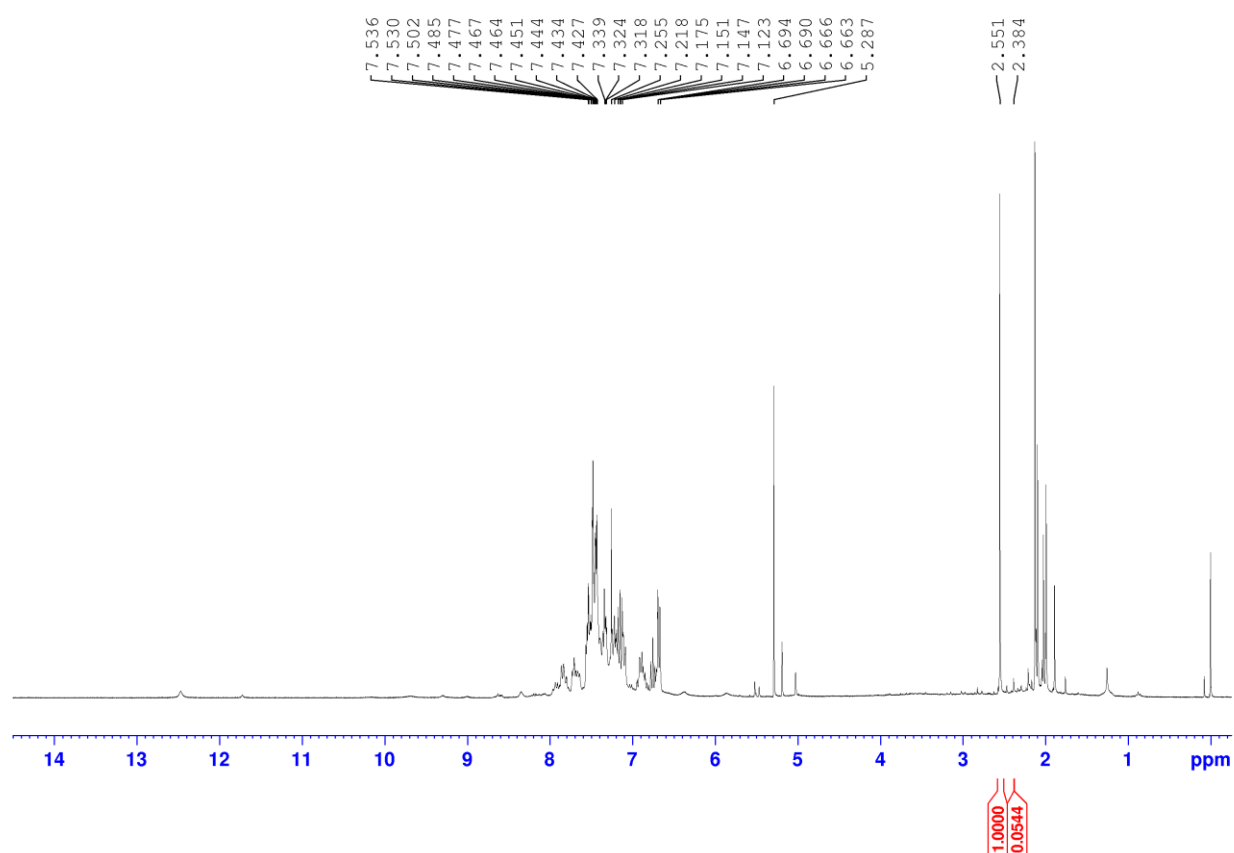

## Entry 12

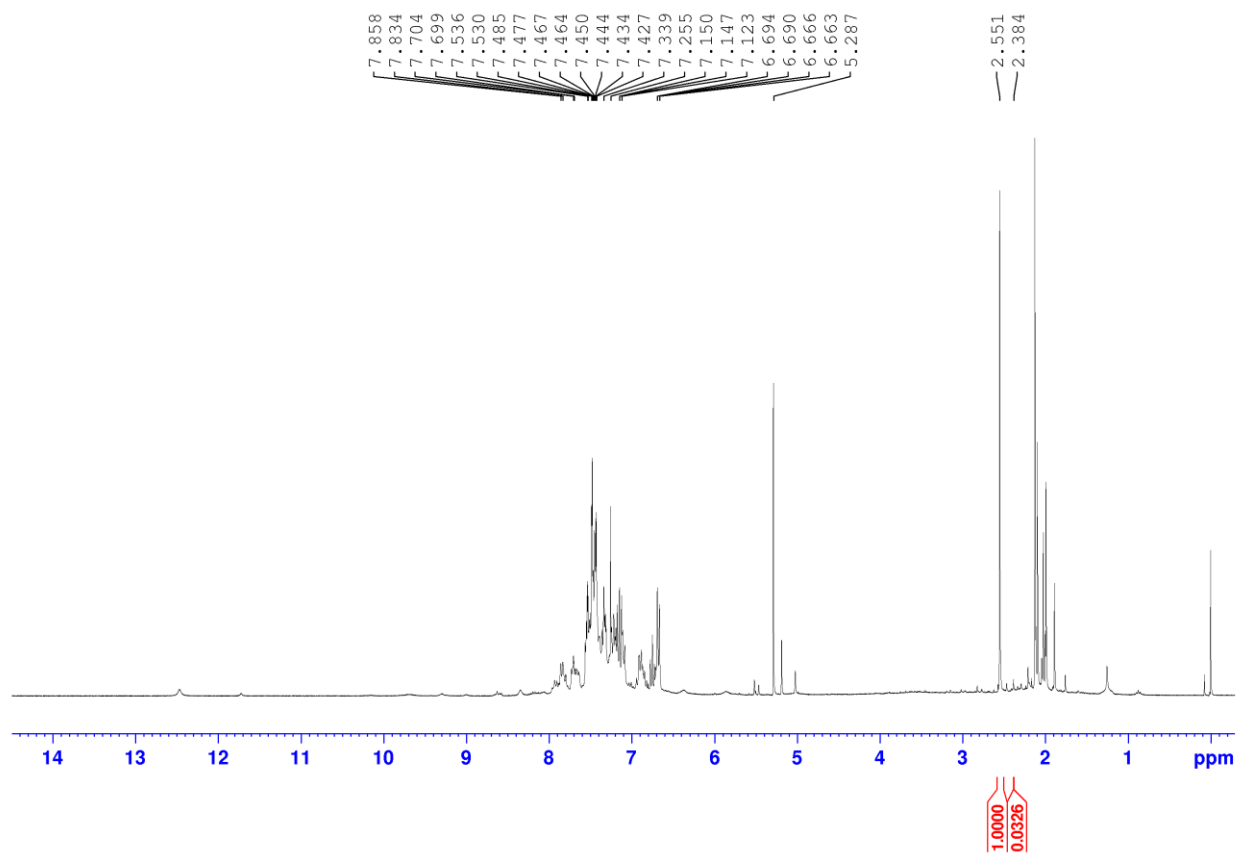



## Entry 13

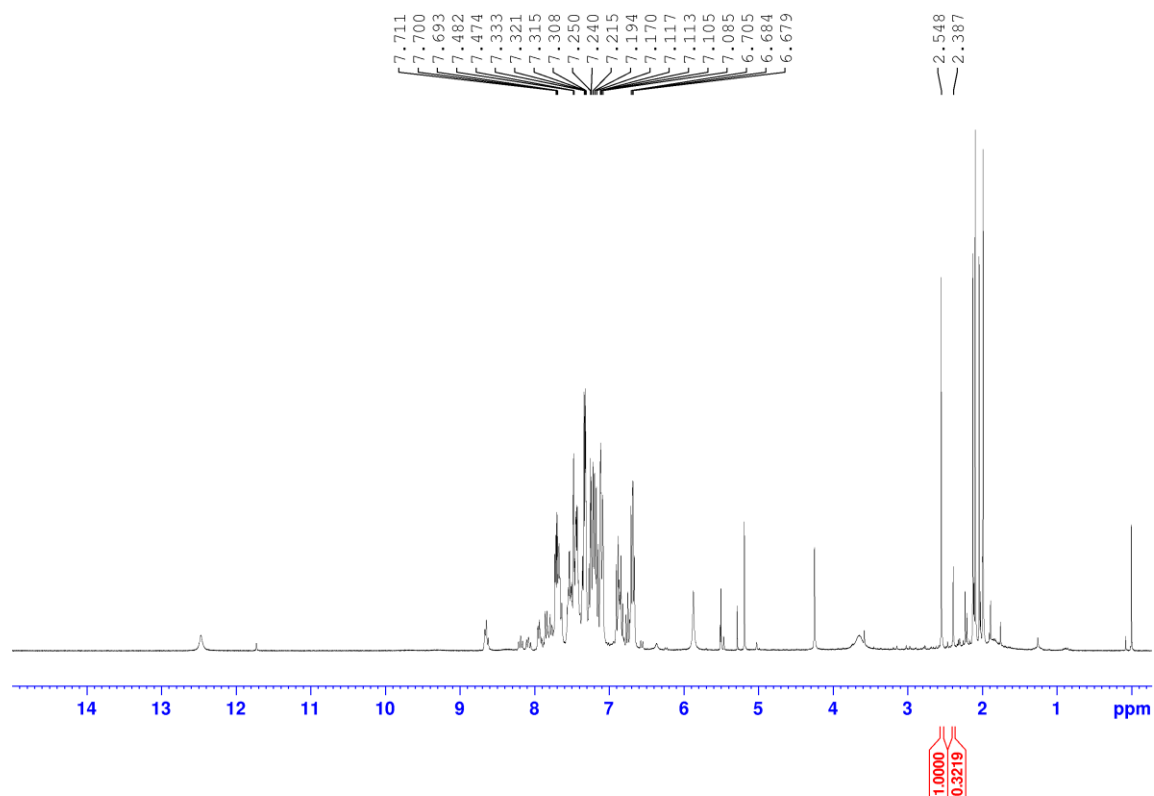

## Entry 14

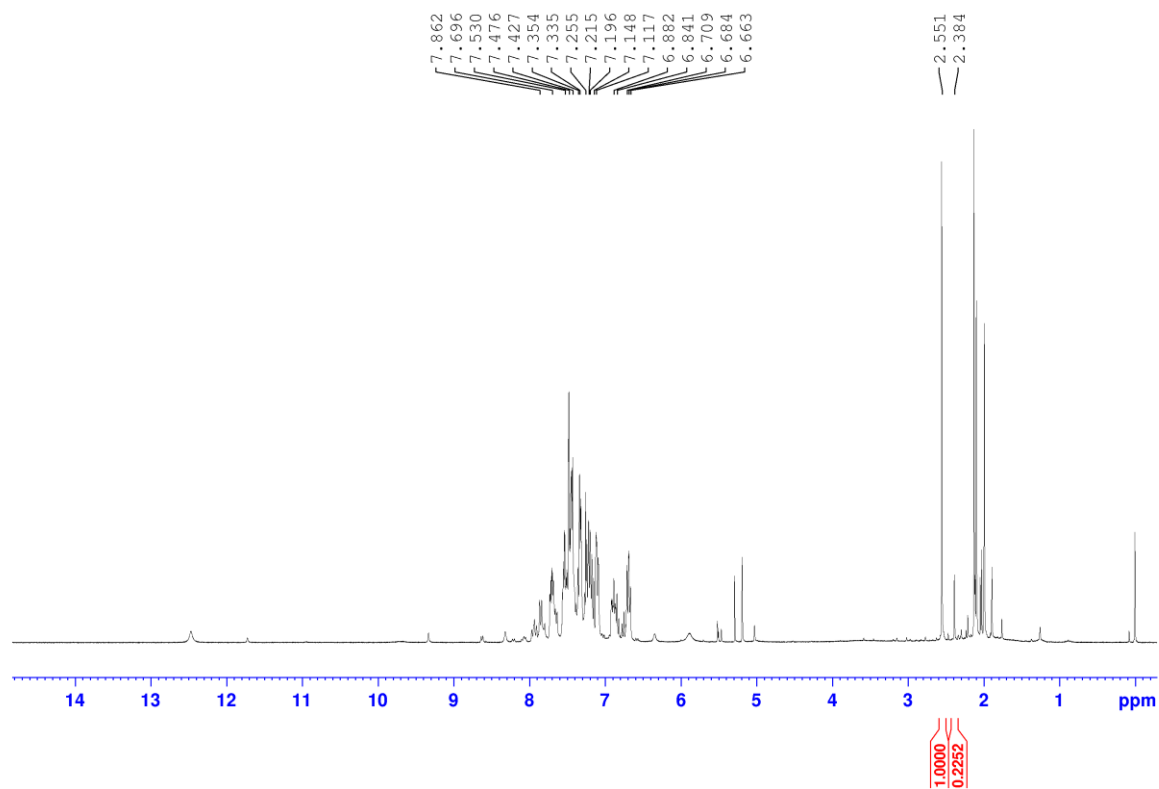

**$^1\text{H}$  NMR spectra of crude reaction mixtures illustrated in Table 2.**

**Entry 1**

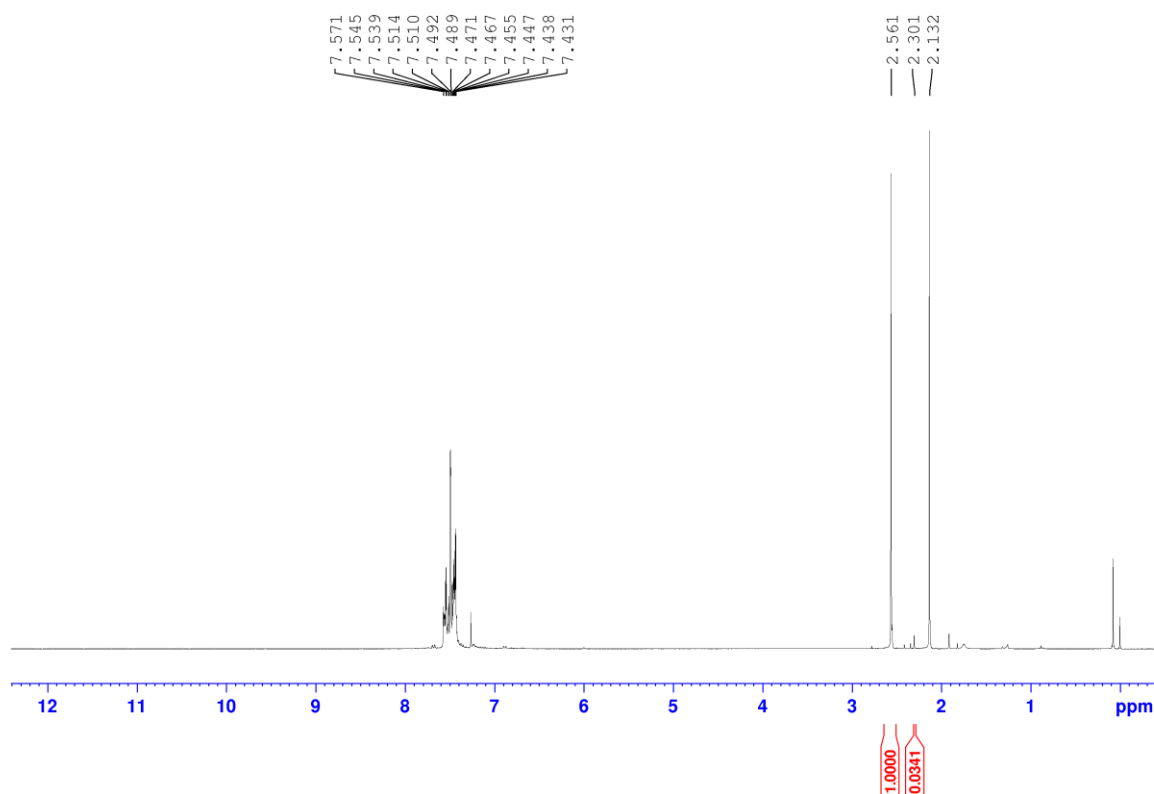

## Entry 2

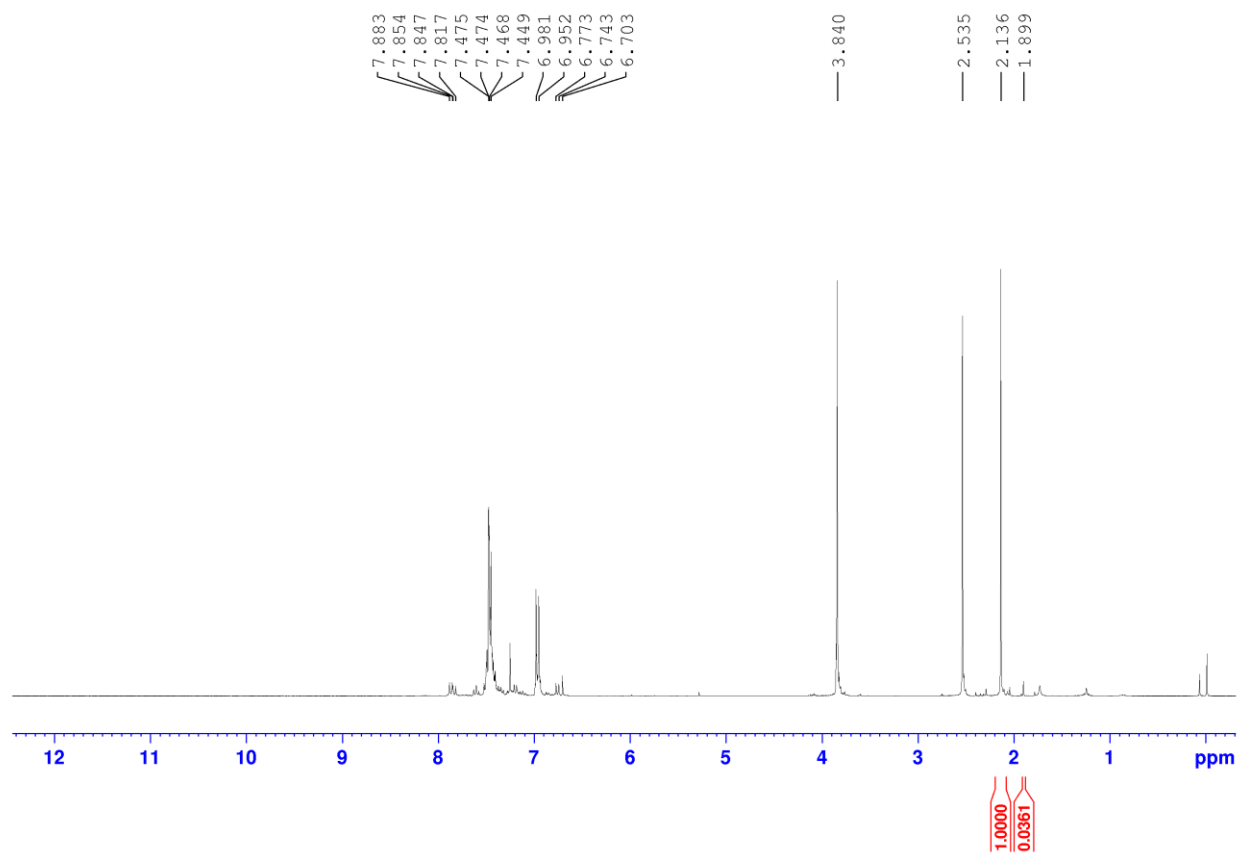

## Entry 3

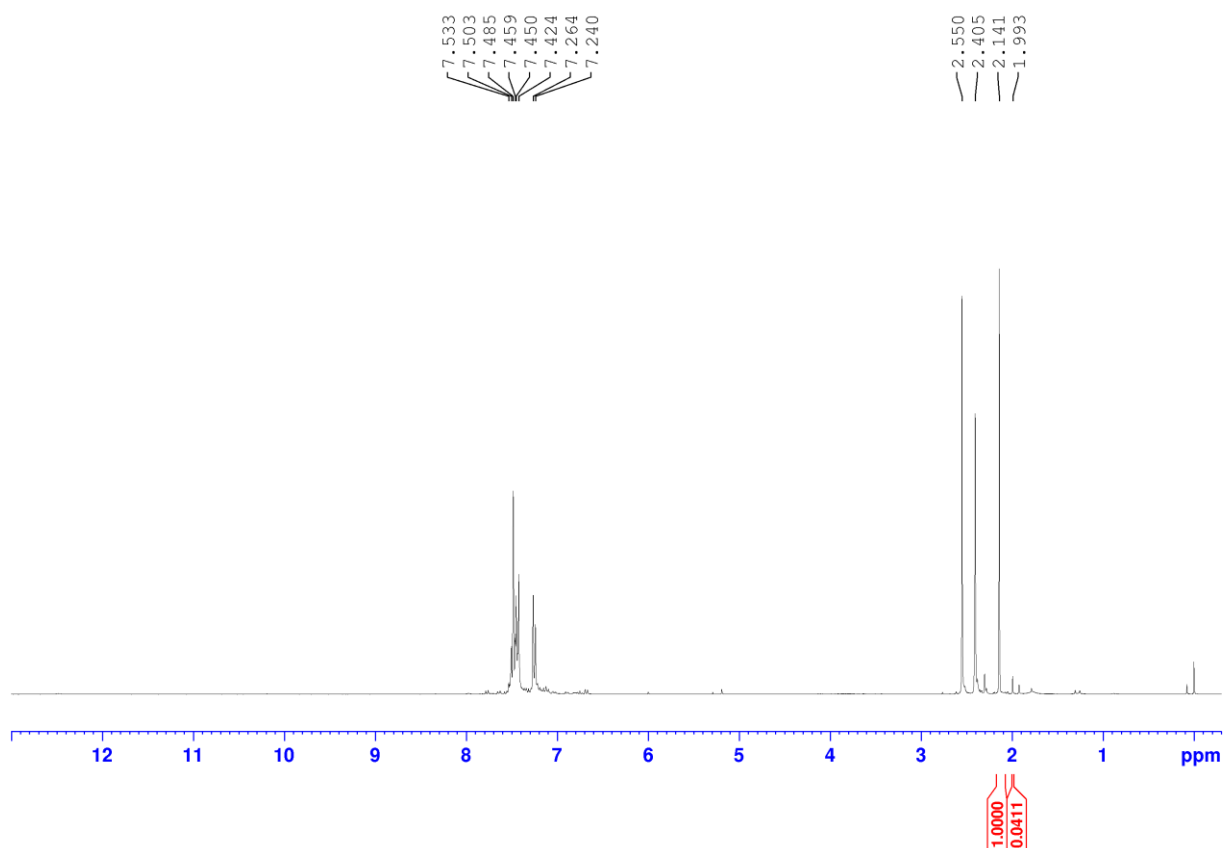

## Entry 4

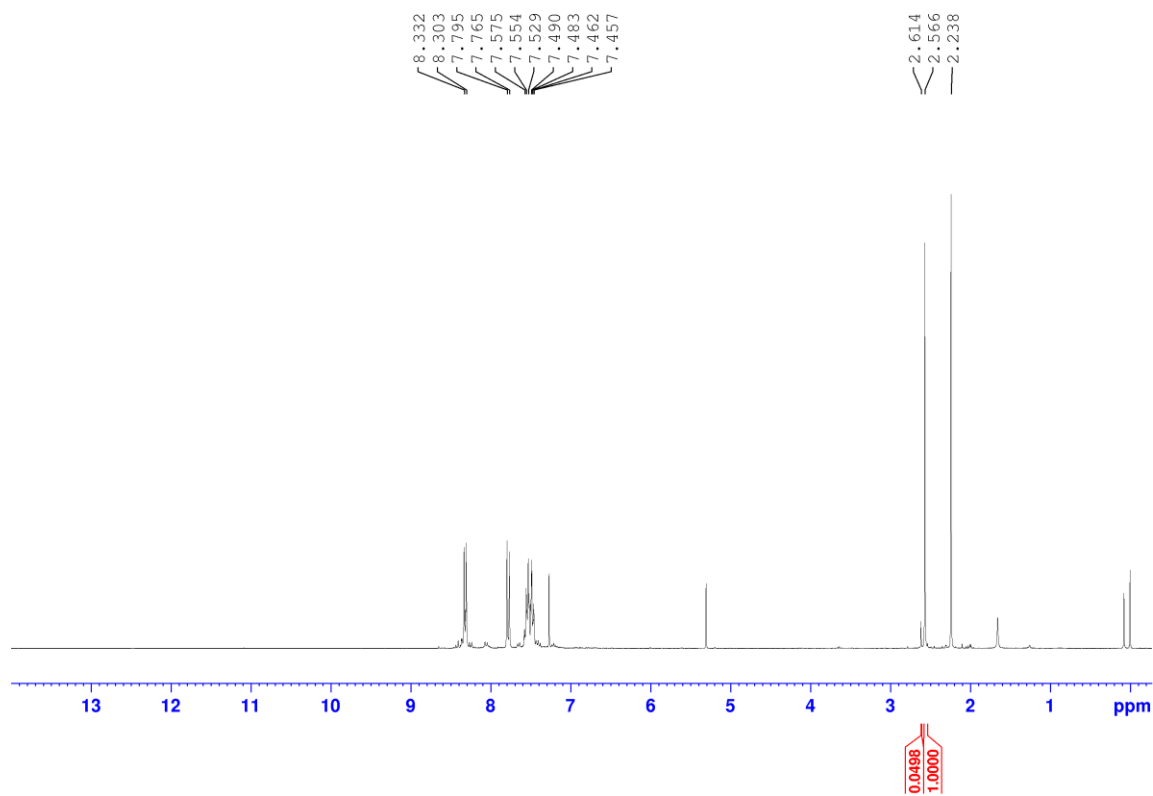

## Entry 5

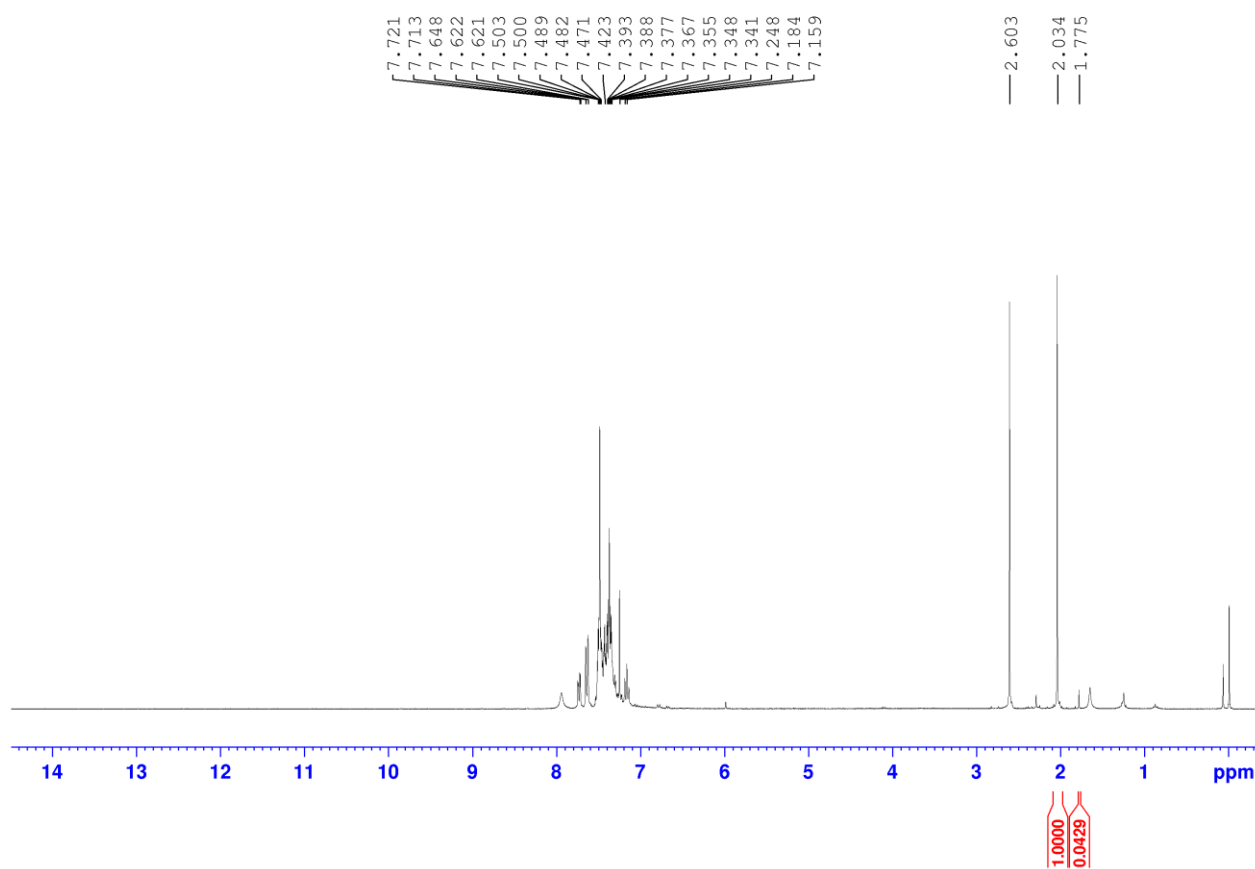

## Entry 6

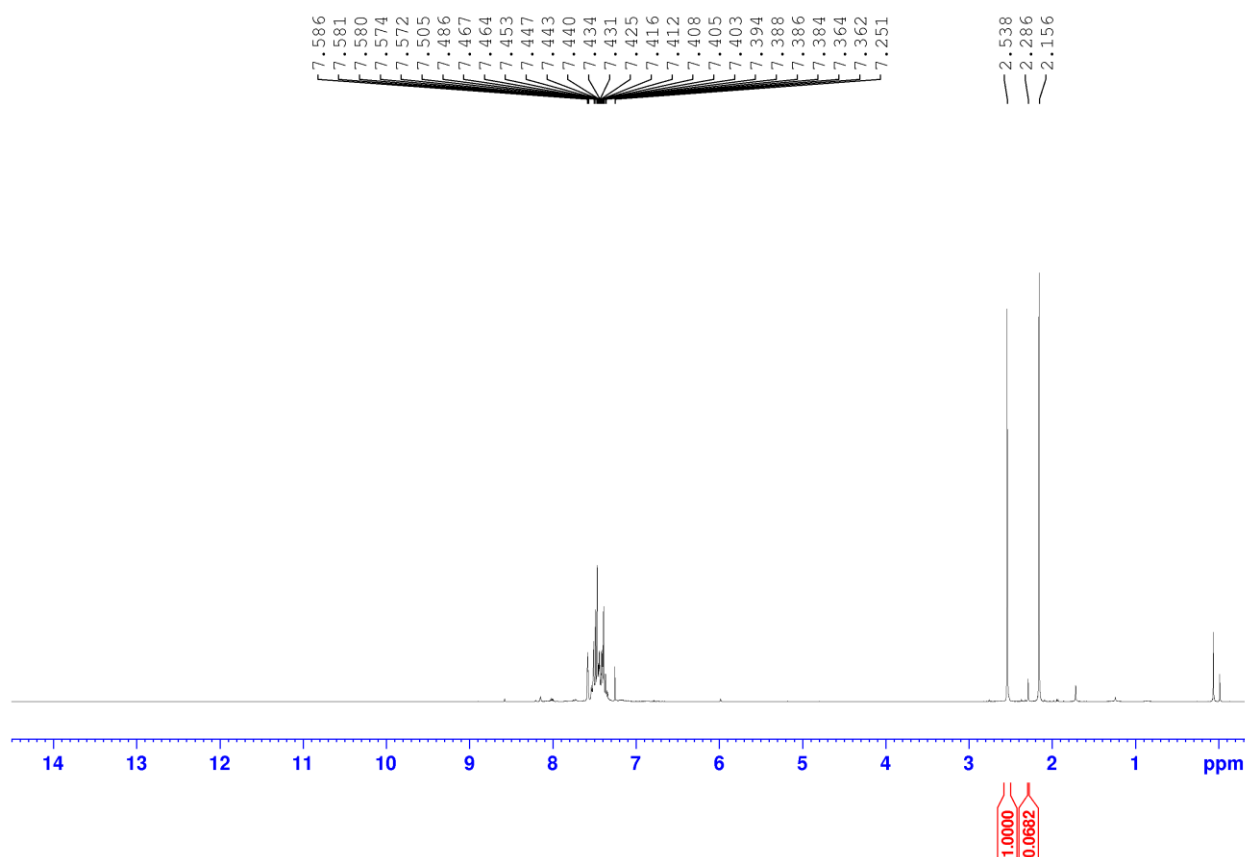



## Entry 7

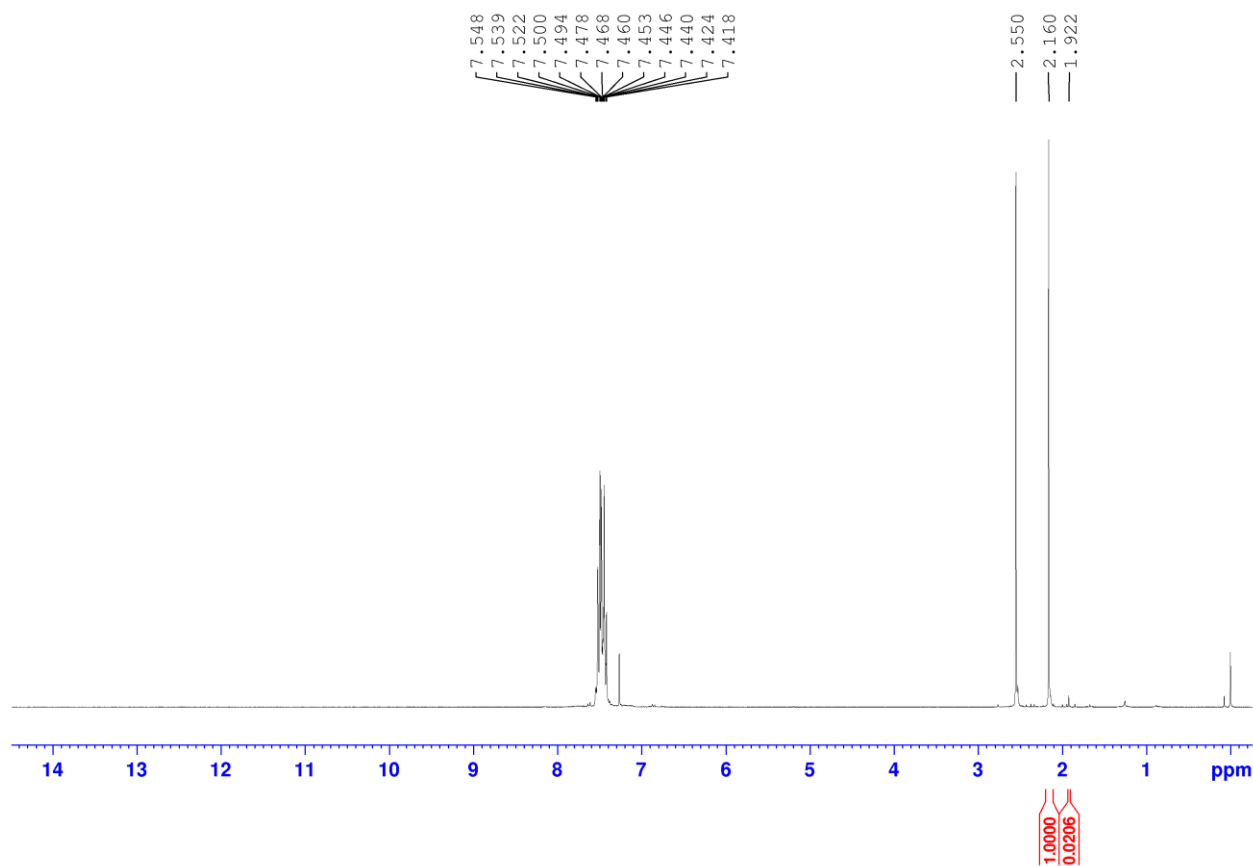

## Entry 8

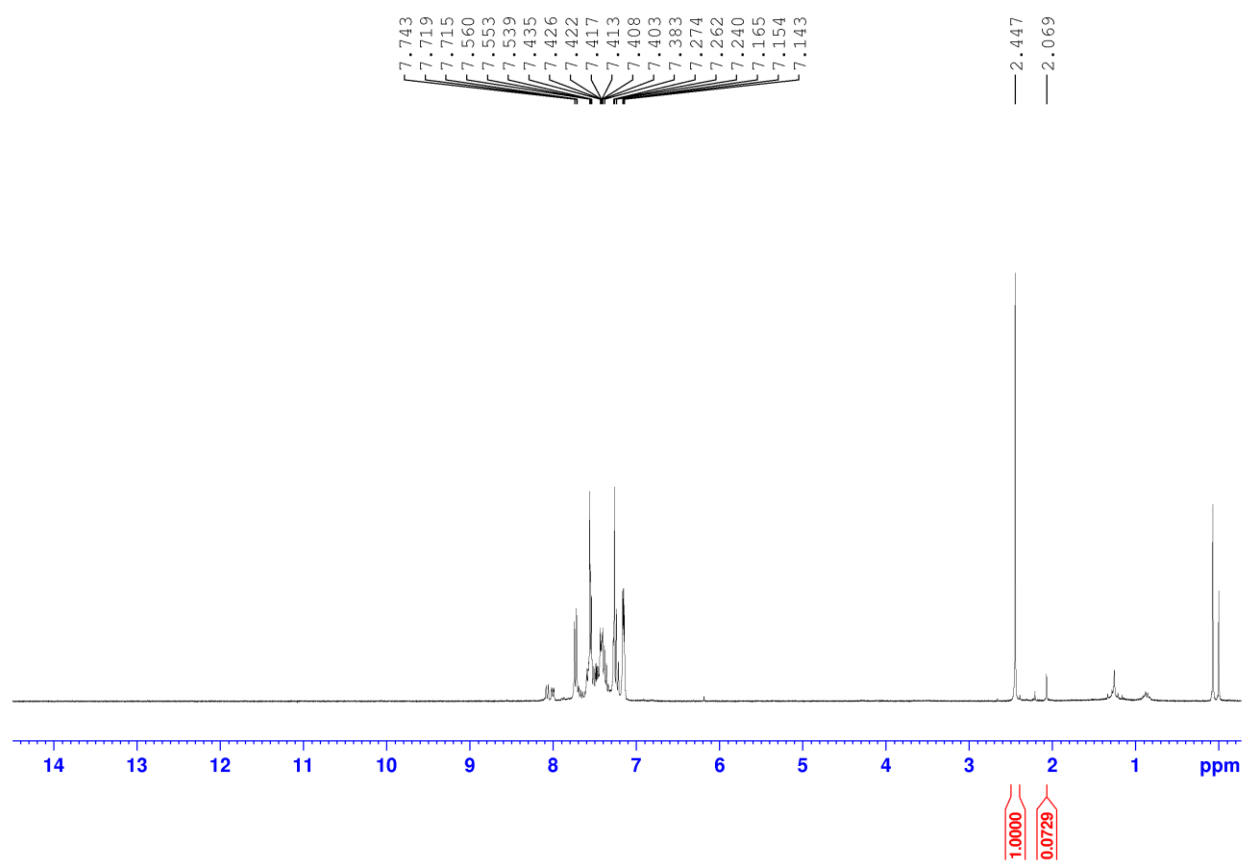

## Entry 9

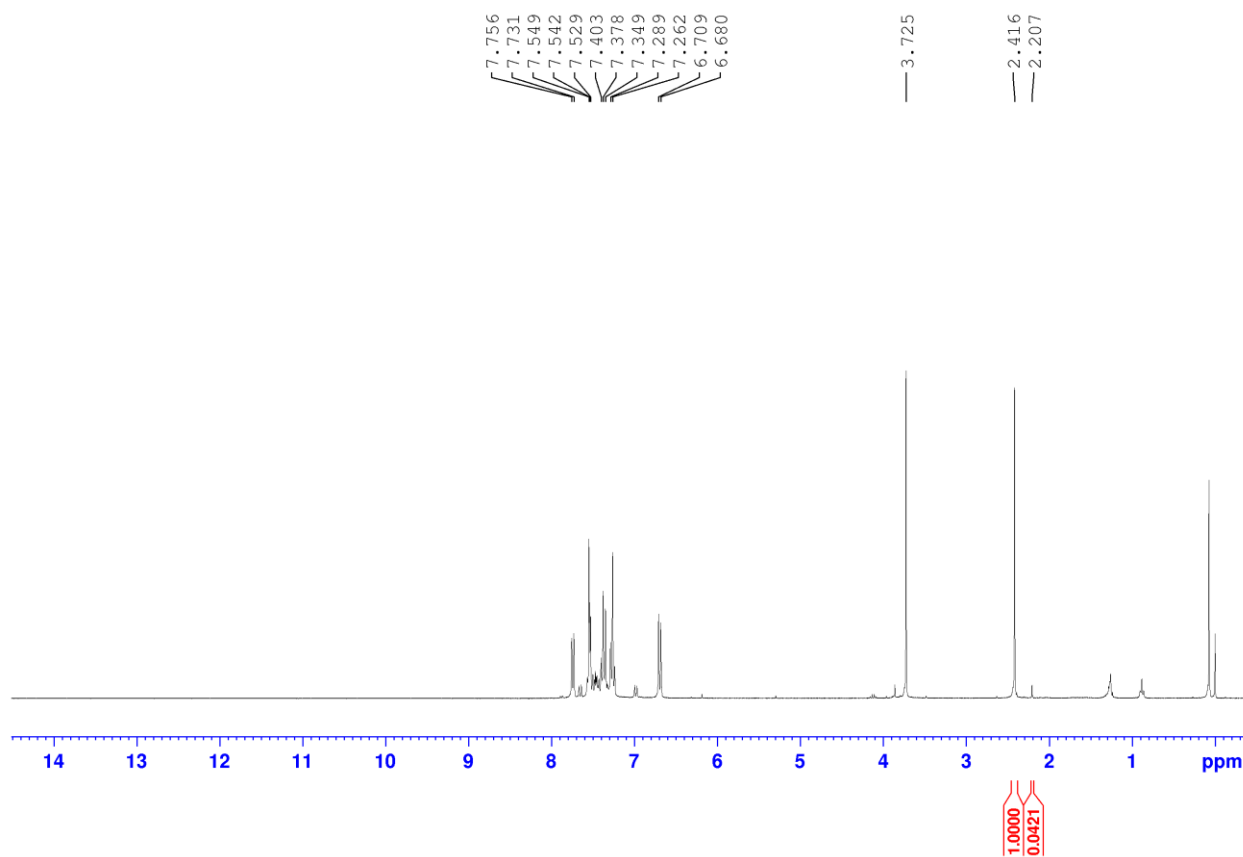

# Entry 10

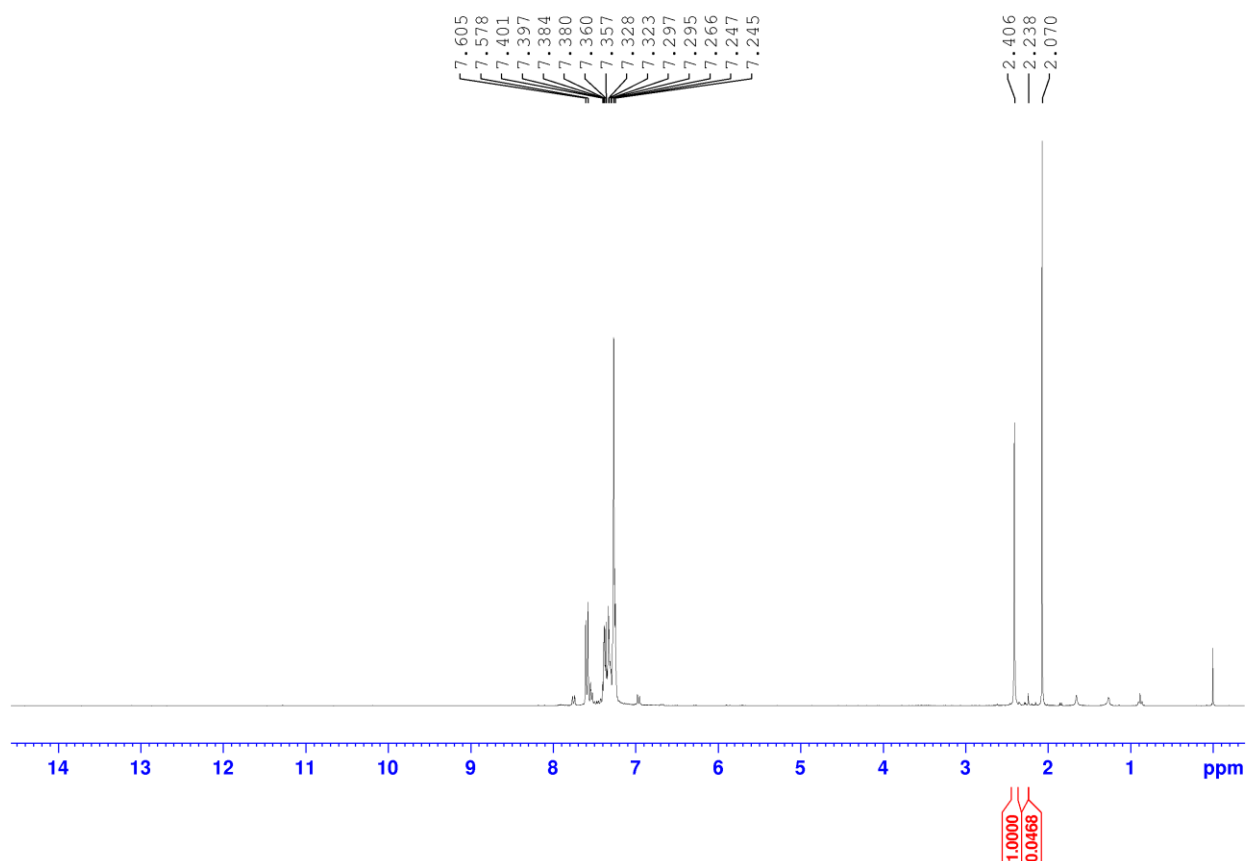

## Entry 11

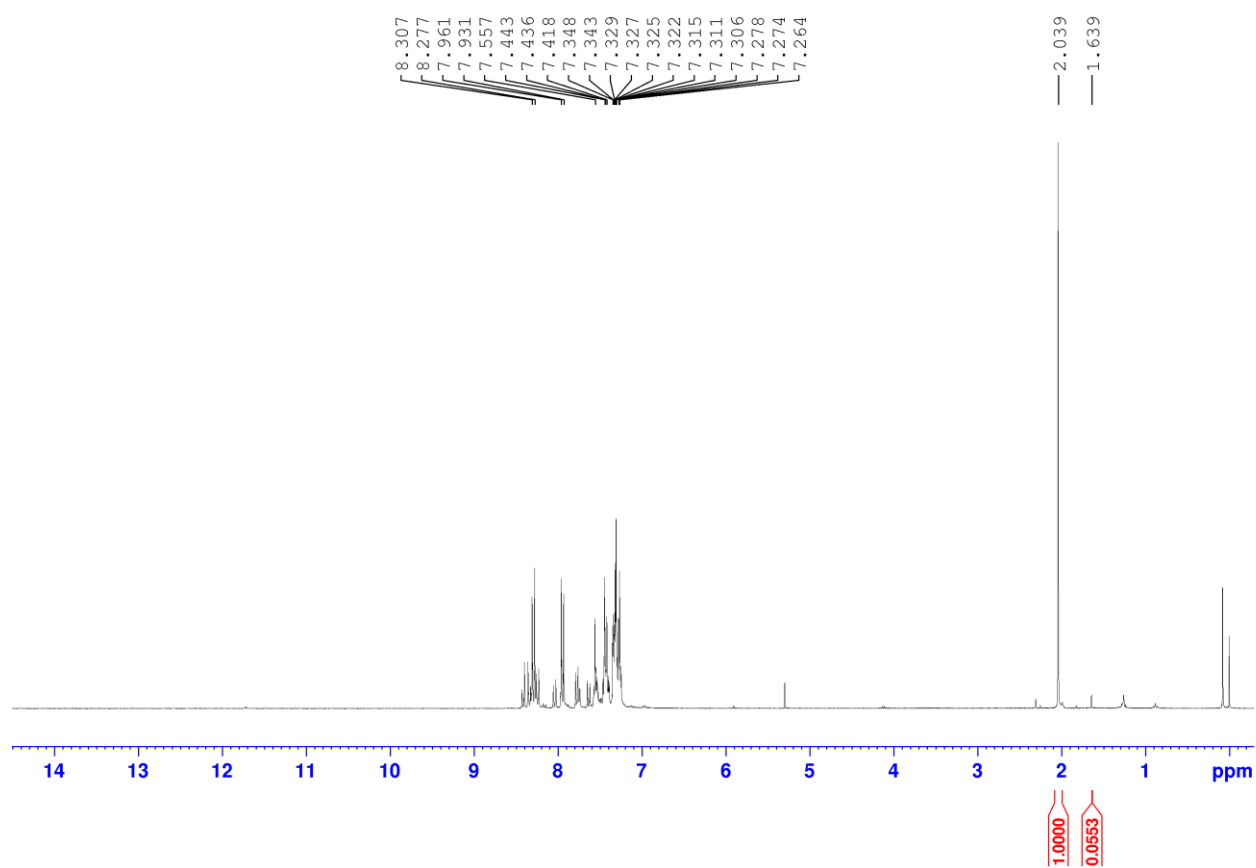

## Entry 12

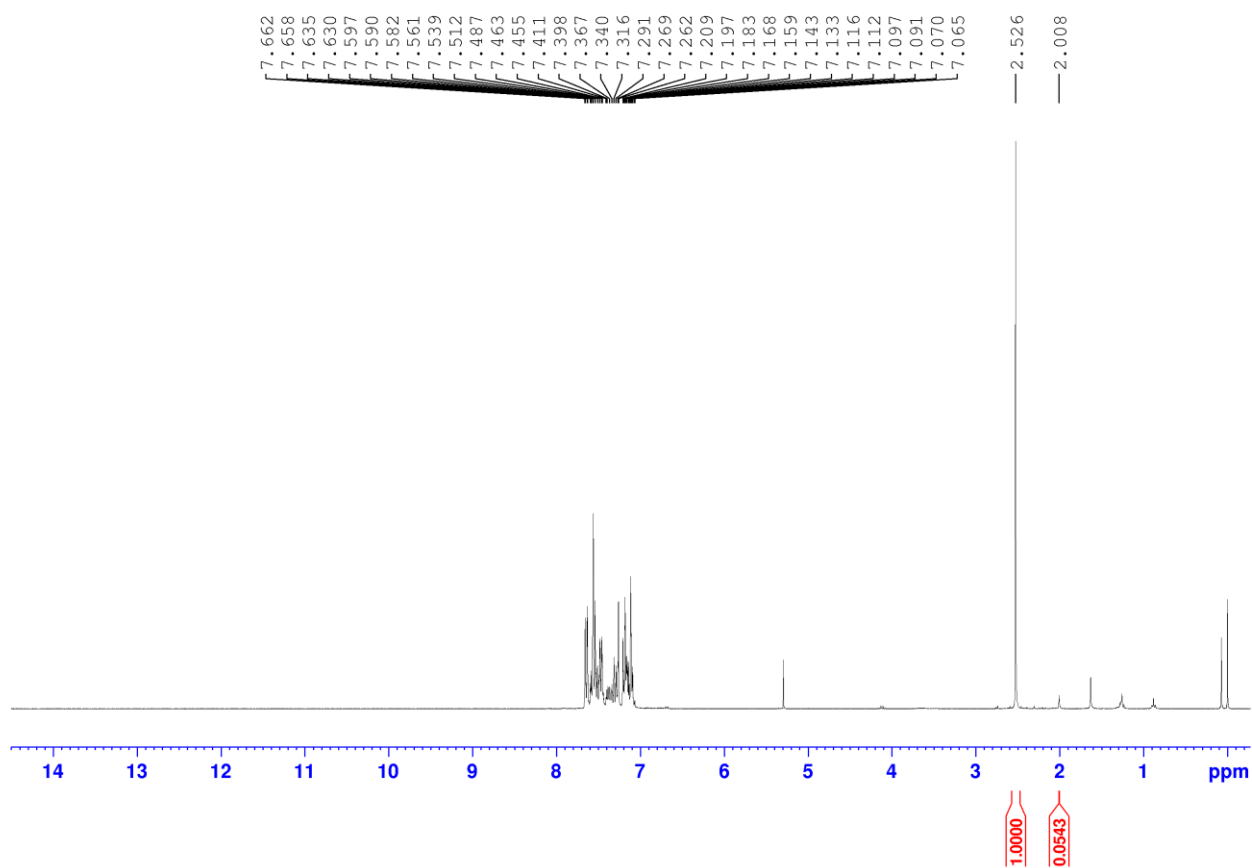

## Entry 13

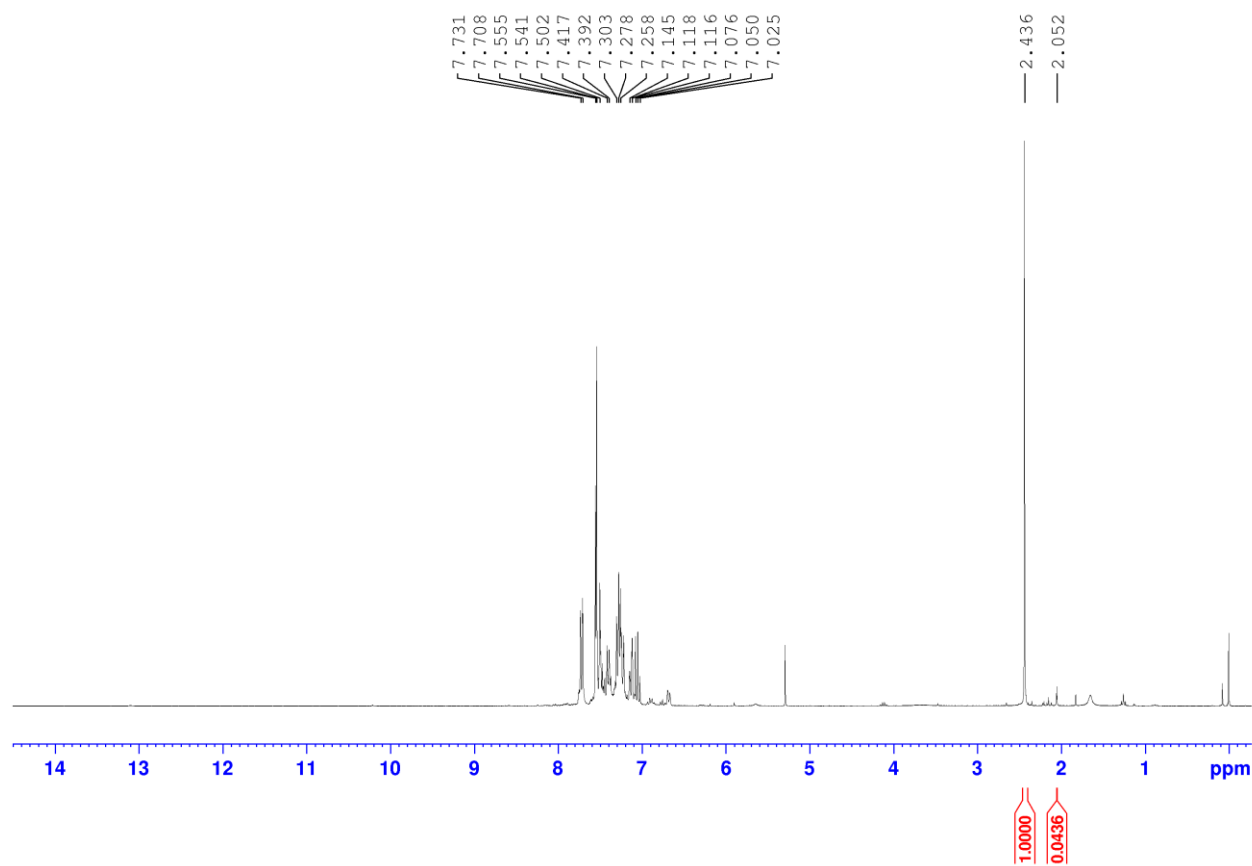

## Entry 14

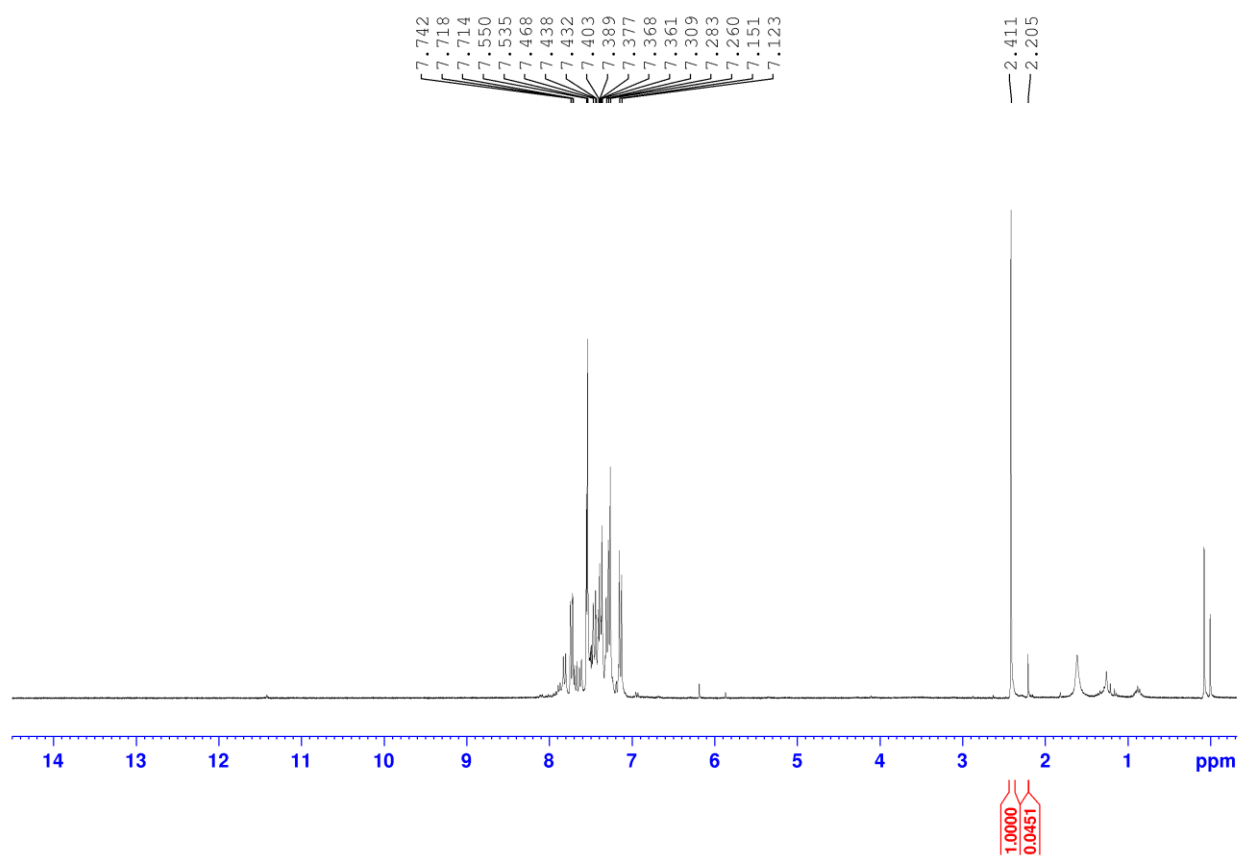



## Entry 15

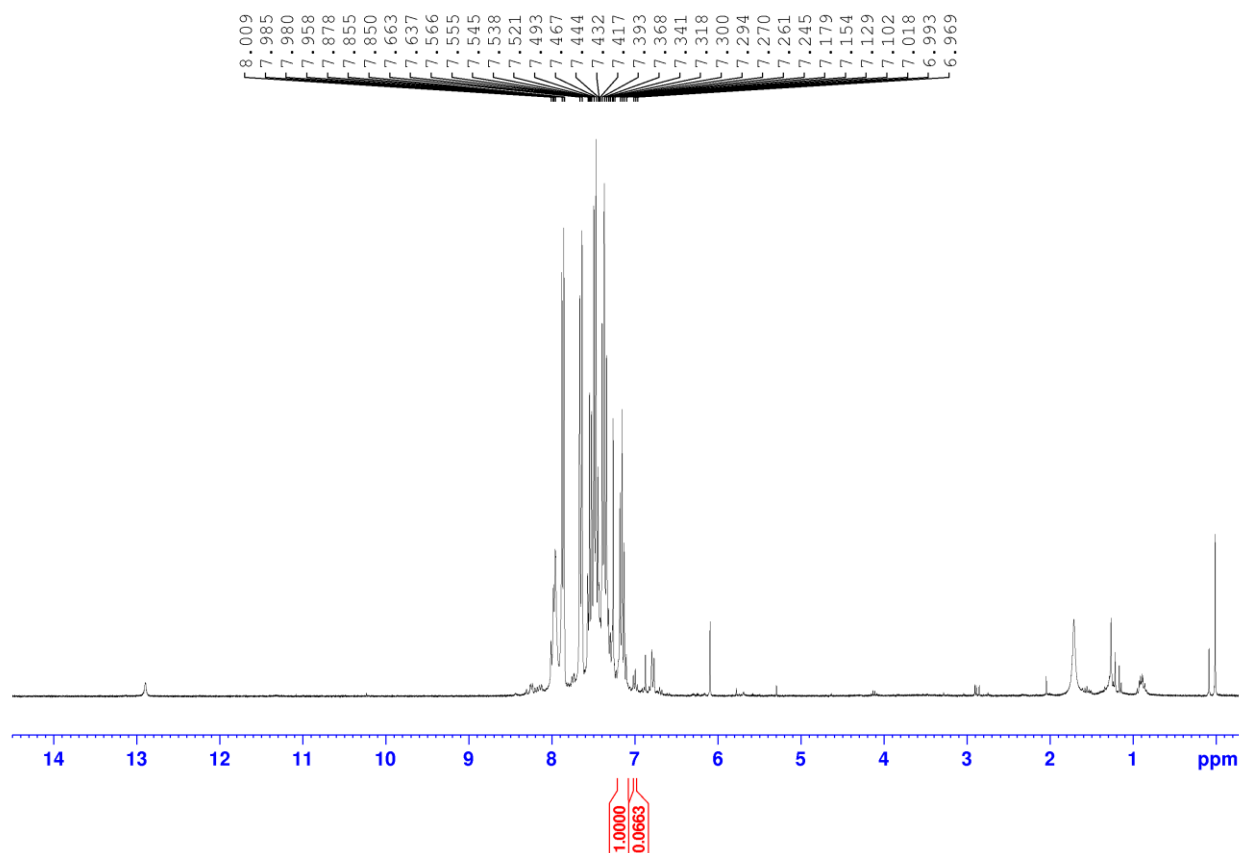

## References

---

- 1 Gallagher, N.; Zangh, H.; Junghoefer, T.; Giangrisostomi, E.; Ovsyannikov, R.; Pink, M.; Rajca, S.; Casu, M.B.; Rajca, A. Thermally and magnetically robust triplet ground state diradical. *J.Am.Chem.Soc.*, **2019**, *141*, 4764–4774.
- 2 Zhang, C.-Y.; Liu, X.-H.; Wang, B.-L.; Wang, S.-H.; Li, Z.-M. Synthesis and antifungal activities of new pyrazole derivatives via 1,3-dipolar cycloaddition reaction. *Chem. Biol. Drug. Des.*, **2010**, *75*, 489–493.
- 3 De Nino, A.; Maiuolo, L.; Merino, P.; Nardi, M.; Procopio, A.; Roca-López, D.; Russo, B.; Algieri, V. Efficient Organocatalyst Supported on a Simple Ionic Liquid as a Recoverable System for the Asymmetric Diels-Alder Reaction in the Presence of Water. *ChemCatChem*, **2015**, *7*, 830–835.
